# Supplementary material for: NH vs. CH hydrogen bond formation in metal–organic anion receptors containing pyrrolylpyridine ligands
Source: Royal Society of Chemistry journal article supplement (doi:10.1039/b510506d), 2005-01-01
Supplement: b510506d.pdf [file b510506d.pdf]

# NH vs CH<sup>-</sup> anion hydrogen bond formation in platinum(tetrakispyridine) complexes

Ismael El Drubi Vega,<sup>a</sup> Philip A. Gale<sup>\*a</sup>, Mark E. Light<sup>a</sup> and Stephen J. Loeb<sup>b</sup>

## INDEX

|                                                                                                                    |           |
|--------------------------------------------------------------------------------------------------------------------|-----------|
| <b>Titration tetrakispyridineplatinum(II) tetrafluoroborate 1.</b>                                                 | <b>3</b>  |
| • Tetrabutylammonium iodide.                                                                                       | 3         |
| • Tetrabutylammonium bromide.                                                                                      | 4         |
| • Tetrabutylammonium chloride.                                                                                     | 5         |
| • Tetrabutylammonium benzoate.                                                                                     | 6         |
| • Tetrabutylammonium acetate.                                                                                      | 7         |
| • Tetrabutylammonium methanesulfonate.                                                                             | 8         |
| • Tetrabutylammonium hydrogensulfate.                                                                              | 9         |
| <b>Titration tetrakis(<i>m</i>-(1<i>H</i>-pyrrole)pyridine)platinum(II) tetrafluoroborate 2.</b>                   | <b>10</b> |
| • Tetrabutylammonium iodide.                                                                                       | 10        |
| • Tetrabutylammonium bromide.                                                                                      | 12        |
| • Tetrabutylammonium chloride.                                                                                     | 14        |
| • Tetrabutylammonium acetate.                                                                                      | 16        |
| • Tetrabutylammonium benzoate.                                                                                     | 19        |
| • Tetrabutylammonium hydrogensulfate.                                                                              | 21        |
| • Tetrabutylammonium methanesulfonate.                                                                             | 23        |
| • Tetrabutylammonium nitrate.                                                                                      | 25        |
| • Tetrabutylammonium triflate.                                                                                     | 27        |
| <b>Titration tetrakis(<i>p</i>-(1<i>H</i>-pyrrole)pyridine)platinum(II) tetrafluoroborate 3.</b>                   | <b>28</b> |
| • Tetrabutylammonium iodide.                                                                                       | 28        |
| • Tetrabutylammonium bromide.                                                                                      | 29        |
| • Tetrabutylammonium chloride.                                                                                     | 30        |
| • Tetrabutylammonium hydrogensulfate.                                                                              | 31        |
| • Tetrabutylammonium nitrate.                                                                                      | 32        |
| • Tetrabutylammonium methanesulfonate.                                                                             | 33        |
| • Tetrabutylammonium acetate.                                                                                      | 34        |
| • Tetrabutylammonium benzoate.                                                                                     | 36        |
| <b>Titration tetrakis(<i>m</i>-(1<i>H</i>-pyrrole)pyridine)platinum(II) tetrafluoroborate 2 in other solvents.</b> | <b>39</b> |
| MeNO <sub>2</sub> - <i>d</i> <sub>3</sub> .                                                                        | 39        |
| • Tetrabutylammonium methanesulfonate.                                                                             | 39        |
| MeCN- <i>d</i> <sub>3</sub> .                                                                                      | 40        |
| • Tetrabutylammonium methanesulfonate.                                                                             | 40        |
| <b>Ligands synthesis</b>                                                                                           | <b>41</b> |
| <i>N</i> -methoxy- <i>N</i> -methylnicotinamide <b>4</b> .                                                         | 42        |
| 3-(1,3-dioxolan-2-yl)-1-(pyridin-3-yl)propan-1-one <b>5</b> .                                                      | 42        |
| 4-oxo-4-(pyridin-3-yl)butanal <b>6</b> .                                                                           | 42        |
| 3-(1 <i>H</i> -pyrrol-2-yl)pyridine <b>7</b> .                                                                     | 42        |
| <i>N</i> -methoxy- <i>N</i> -methylisonicotinamide <b>8</b> .                                                      | 42        |
| 3-(1,3-dioxolan-2-yl)-1-(pyridin-4-yl)propan-1-one <b>9</b> .                                                      | 42        |
| 4-oxo-4-(pyridin-4-yl)butanal <b>10</b> .                                                                          | 42        |
| 4-(1 <i>H</i> -pyrrol-2-yl)pyridine <b>11</b> .                                                                    | 42        |

|                                                                     |           |
|---------------------------------------------------------------------|-----------|
| <b>Stack plots .....</b>                                            | <b>43</b> |
| Methanesulfonate in DMSO- <i>d</i> <sub>6</sub> .....               | 43        |
| Iodide in DMSO- <i>d</i> <sub>6</sub> .....                         | 43        |
| Bromide in DMSO- <i>d</i> <sub>6</sub> .....                        | 44        |
| Chloride in DMSO- <i>d</i> <sub>6</sub> .....                       | 44        |
| Acetate in DMSO- <i>d</i> <sub>6</sub> .....                        | 45        |
| Methanesulfonate in MeNO <sub>2</sub> - <i>d</i> <sub>3</sub> ..... | 45        |
| Methanesulfonate in MeCN- <i>d</i> <sub>3</sub> .....               | 46        |
| Chloride in MeNO <sub>2</sub> - <i>d</i> <sub>3</sub> .....         | 46        |
| Bromide in MeNO <sub>2</sub> - <i>d</i> <sub>3</sub> .....          | 47        |
| Iodide in MeNO <sub>2</sub> - <i>d</i> <sub>3</sub> .....           | 47        |
| Hydrogensulfate in MeNO <sub>2</sub> - <i>d</i> <sub>3</sub> .....  | 48        |
| Nitrate in MeNO <sub>2</sub> - <i>d</i> <sub>3</sub> .....          | 48        |
| <b>Shifts overview .....</b>                                        | <b>49</b> |
| <b>CH correlation experiments. ....</b>                             | <b>51</b> |
| HMQC of compound <b>2</b> .....                                     | 51        |
| HMQC of compound <b>3</b> .....                                     | 52        |
| <b>Spectroscopic data.....</b>                                      | <b>53</b> |
| Compound <b>1</b> .....                                             | 53        |
| <sup>1</sup> H NMR.....                                             | 53        |
| <sup>13</sup> C NMR.....                                            | 54        |
| HR Mass spectrum .....                                              | 55        |
| Compound <b>2</b> .....                                             | 56        |
| <sup>1</sup> H NMR.....                                             | 56        |
| <sup>13</sup> C NMR.....                                            | 57        |
| HR Mass spectrum .....                                              | 58        |
| Compound <b>3</b> .....                                             | 59        |
| <sup>1</sup> H NMR.....                                             | 59        |
| <sup>13</sup> C NMR.....                                            | 60        |
| HR Mass spectrum .....                                              | 61        |

# Titration tetrakispyridineplatinum(II) tetrafluoroborate **1**.

- Tetrabutylammonium iodide.

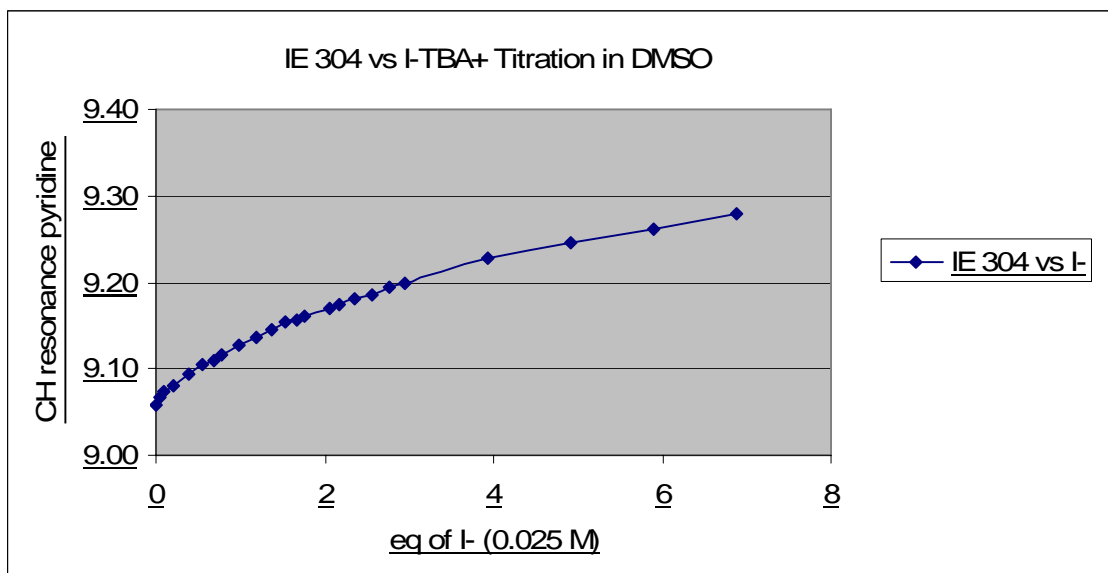

Graph 1 NMR titration shift graph.

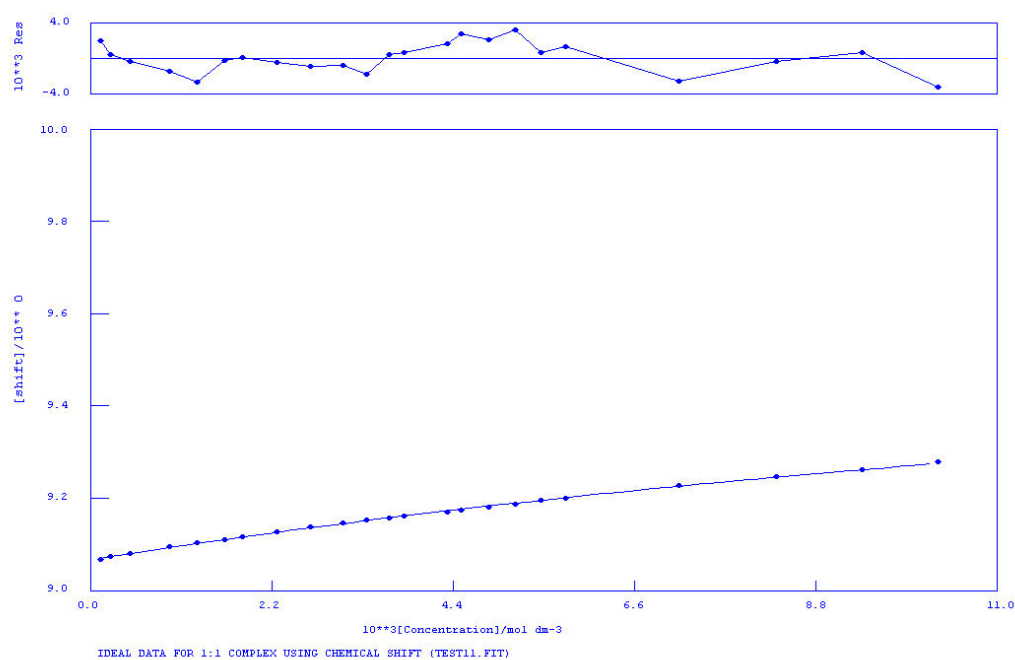

Fit 1 WinNMR fit.

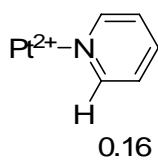

Figure 1 Shift at 3 eq.

- Tetrabutylammonium bromide.

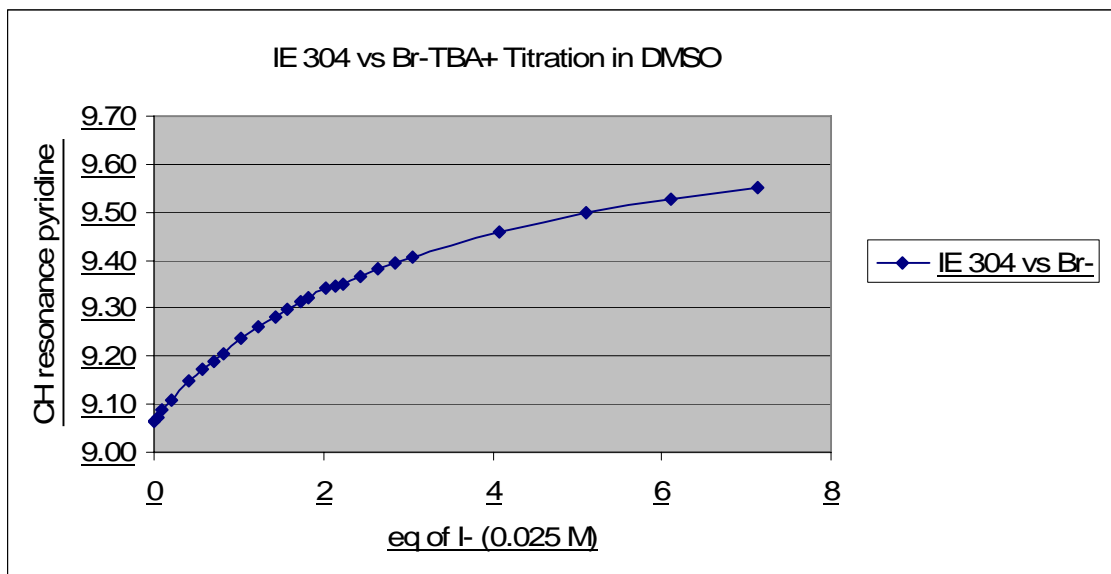

Graph 2 NMR titration shift graph.

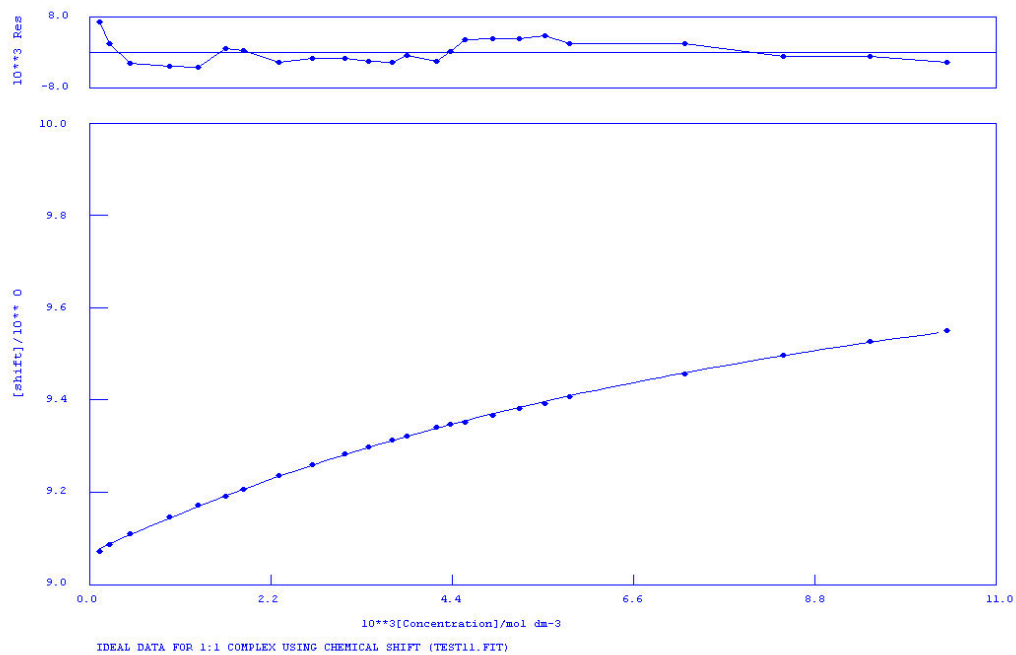

Fit 2 WinNMR fit.

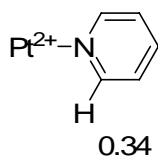

Figure 2 Shift at 3 eq.

- Tetrabutylammonium chloride.

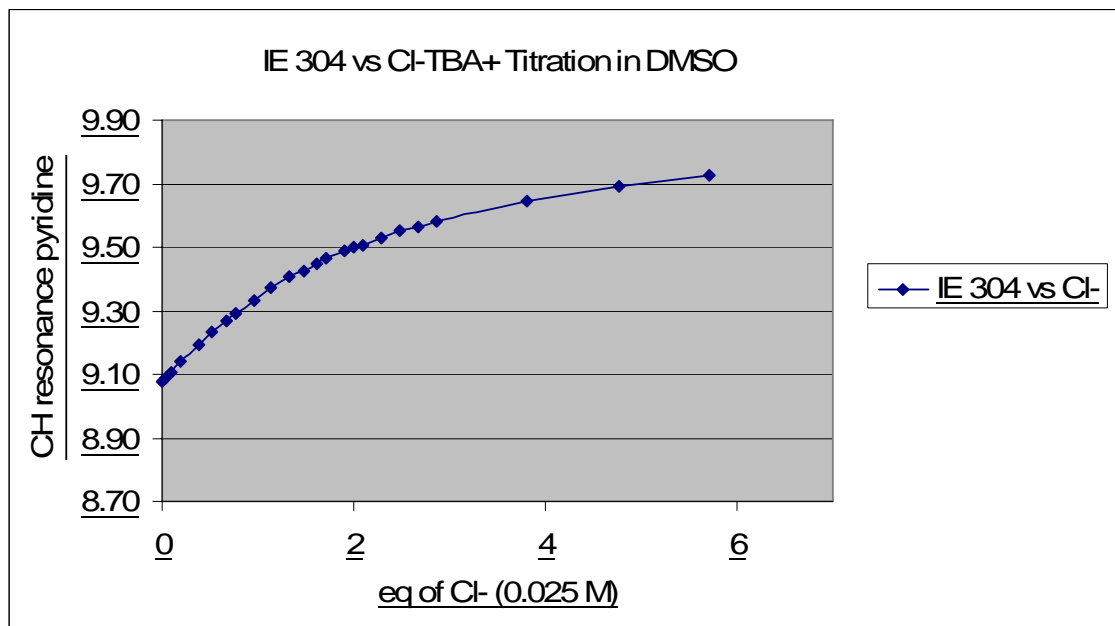

**Graph 3** NMR titration shift graph.

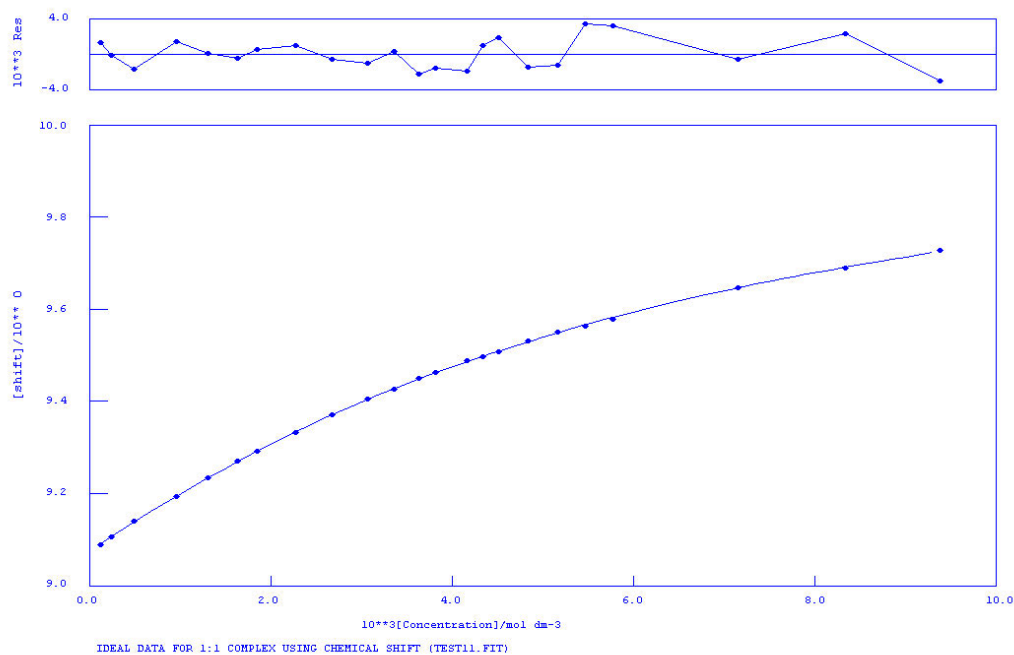

**Fit 3** WinNMR fit.

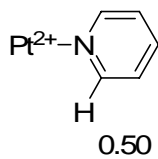

**Figure 3** Shift at 3 eq.

- Tetrabutylammonium benzoate.

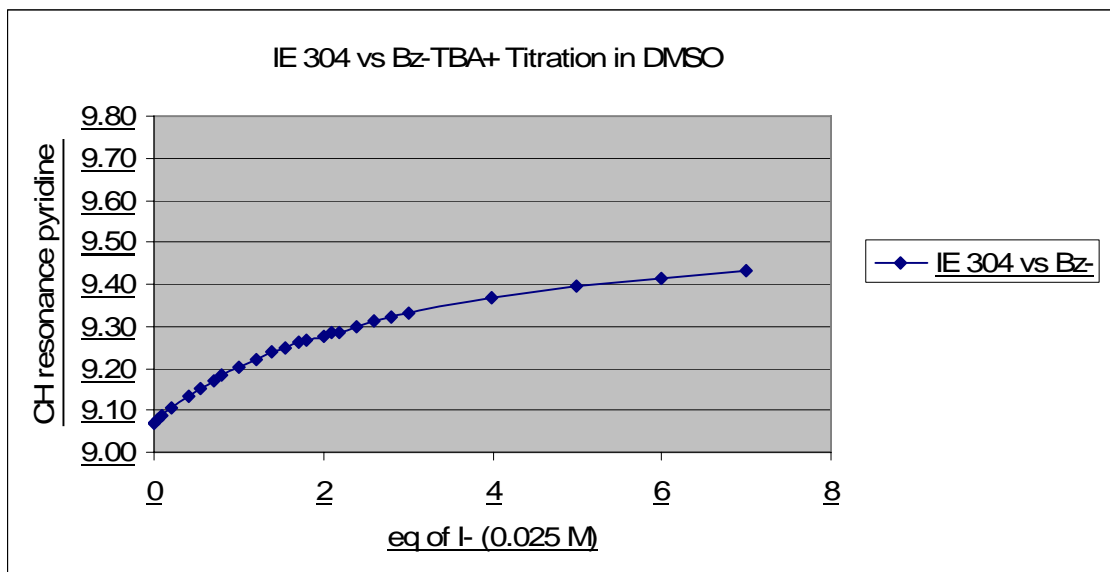

Graph 4 NMR titration shift graph.

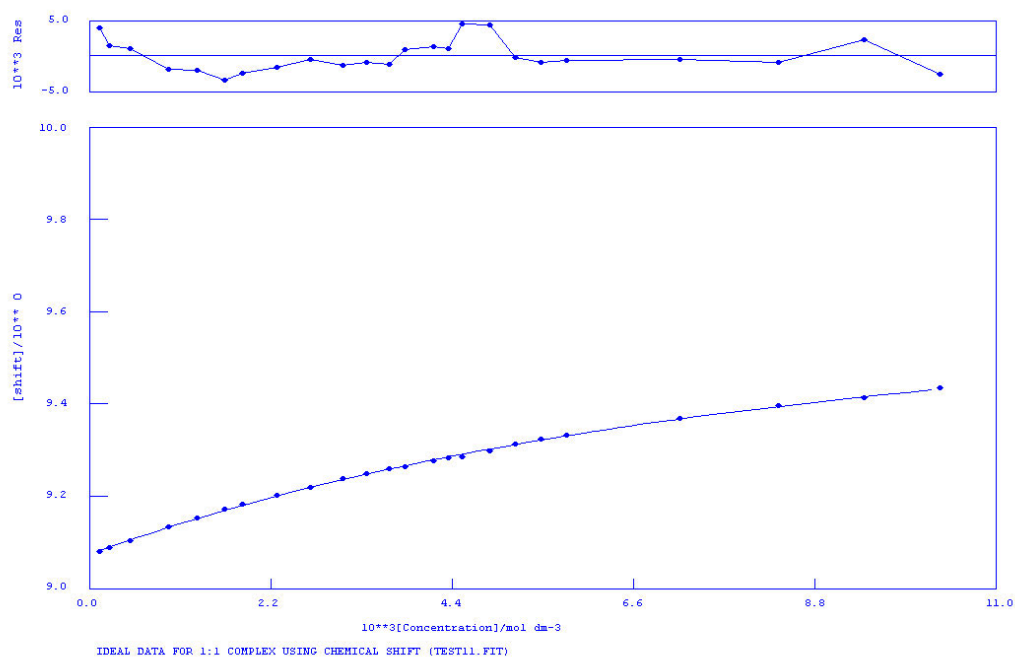

Fit 4 WinNMR fit.

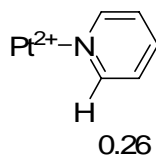

Figure 4 Shift at 3 eq.

- Tetrabutylammonium acetate.

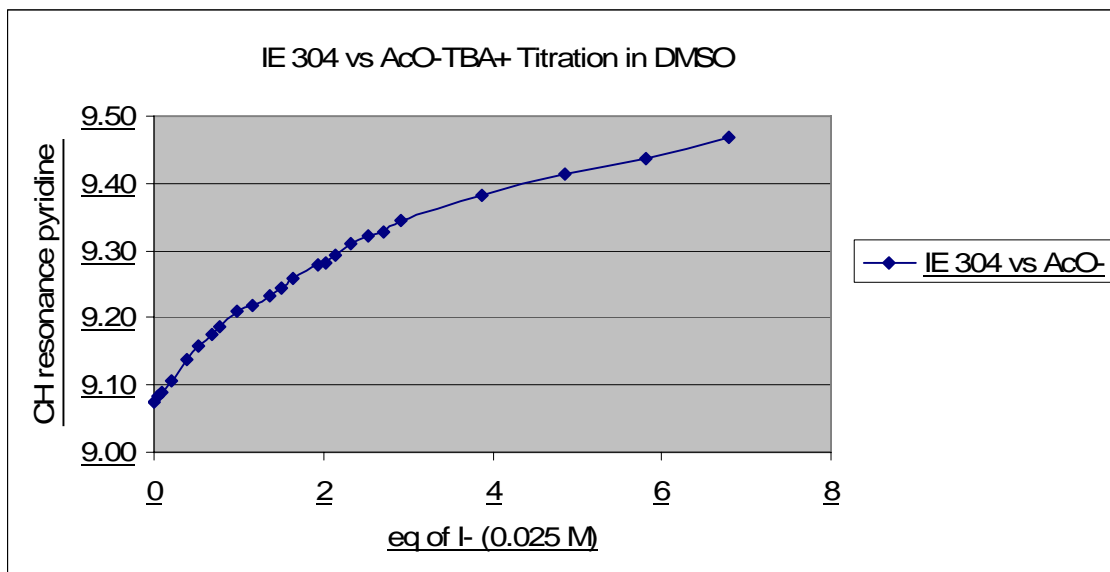

Graph 5 NMR titration shift graph.

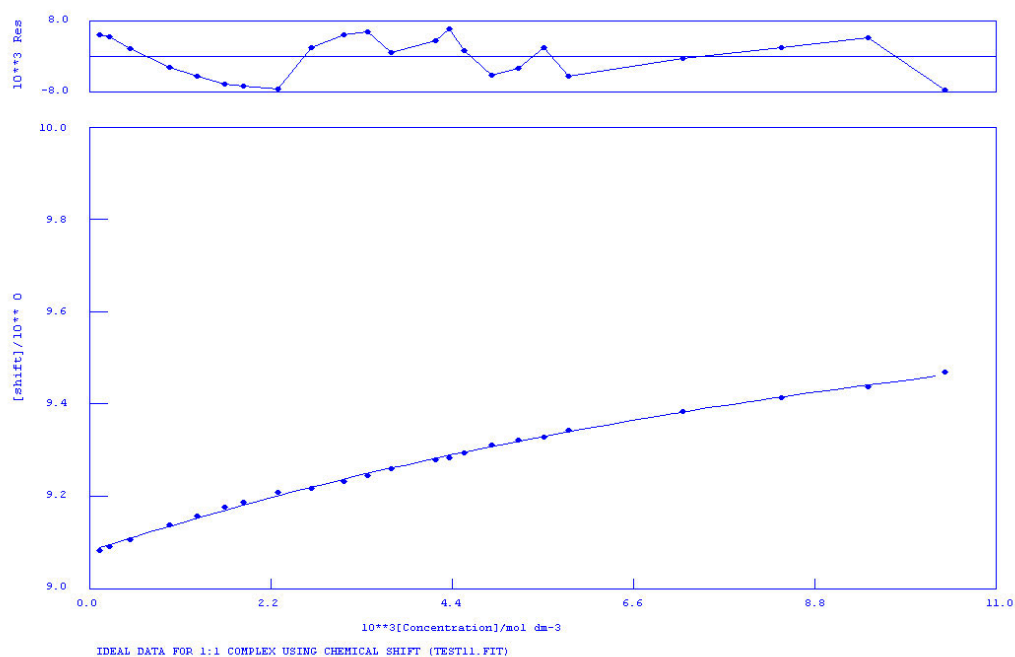

Fit 5 WinNMR fit.

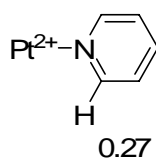

Figure 5 Shift at 3 eq.

- Tetrabutylammonium methanesulfonate.

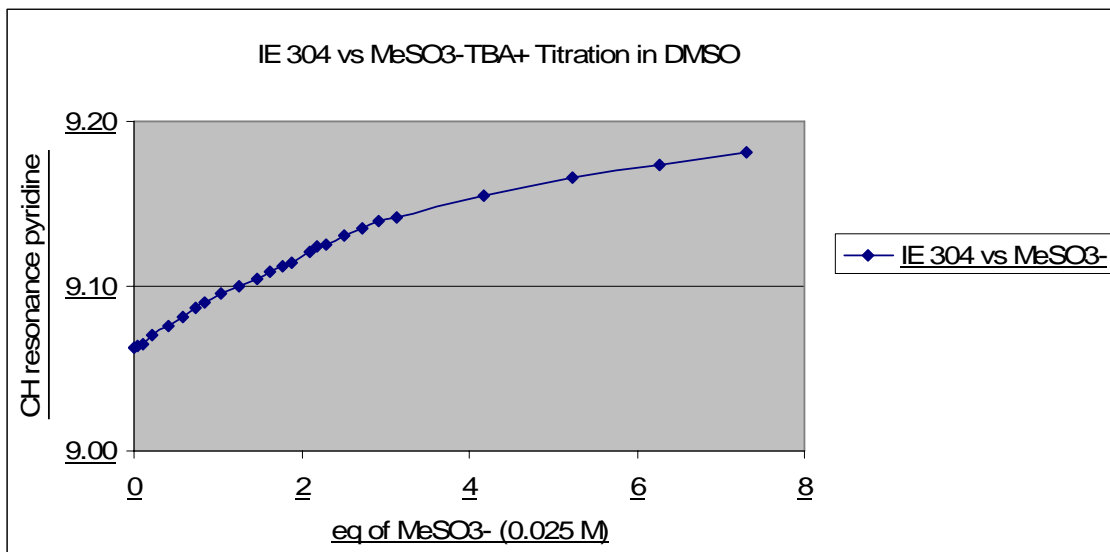

Graph 6 NMR titration shift graph.

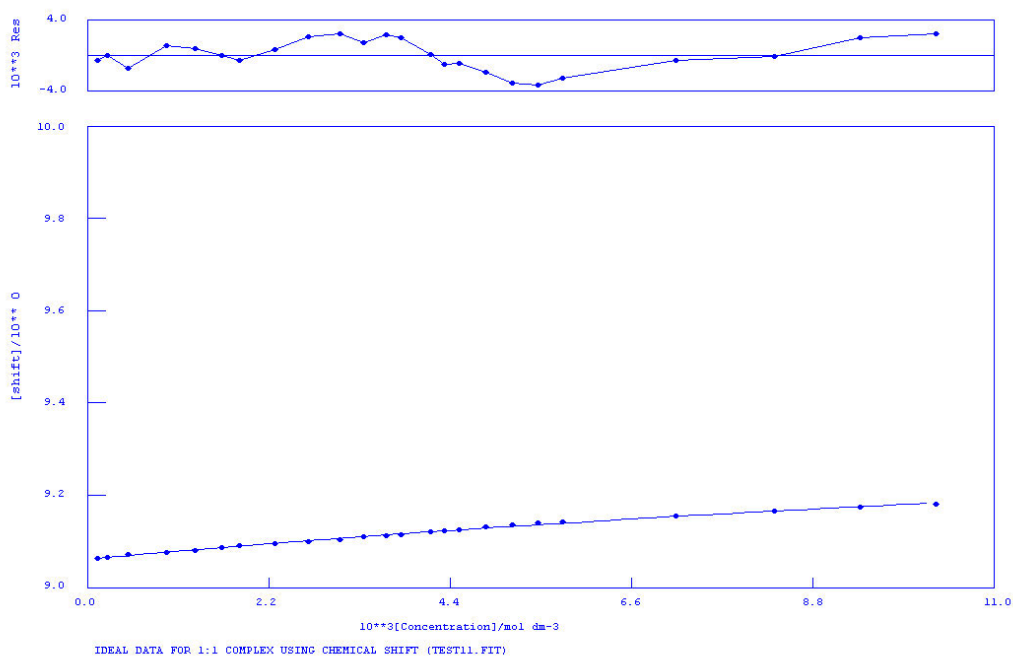

Fit 6 WinNMR fit.

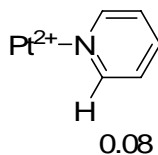

Figure 6 Shift at 3 eq.



- Tetrabutylammonium hydrogensulfate.

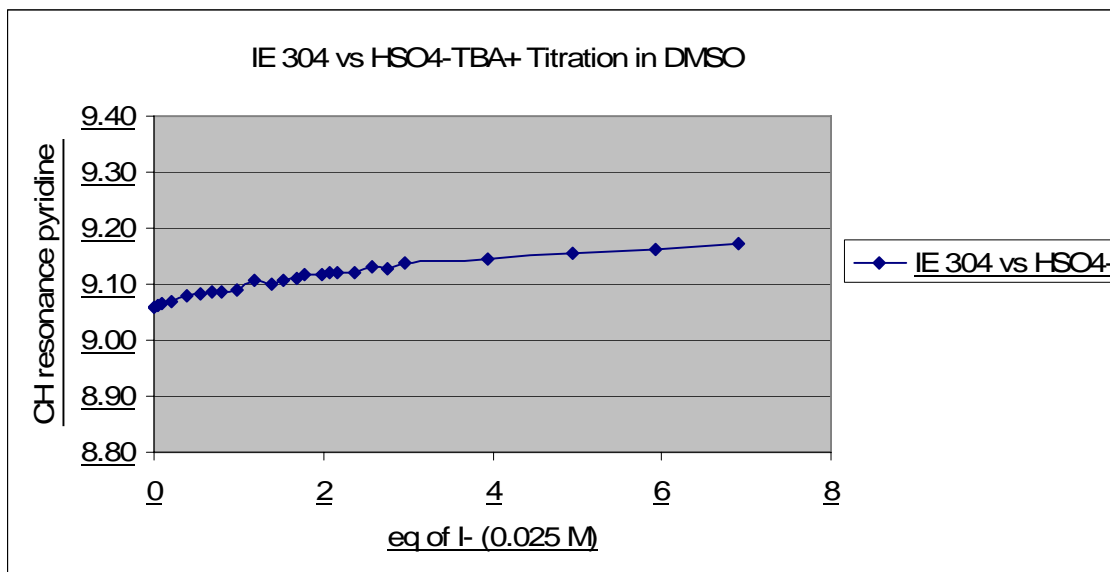

Graph 7 NMR titration shift graph.

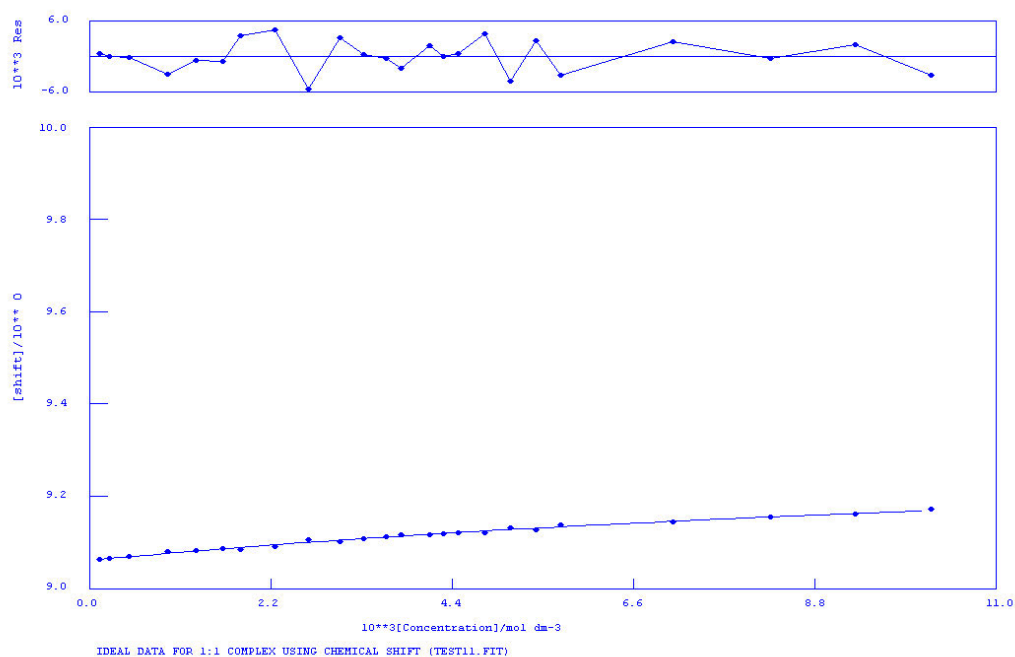

Fit 7 WinNMR fit.

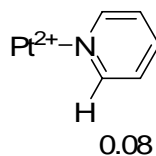

Figure 7 Shift at 3 eq.

Titration tetrakis(m-(1H-pyrrole)pyridine)platinum(II) tetrafluoroborate **2**.

- Tetrabutylammonium iodide.
  - CH Pyridine

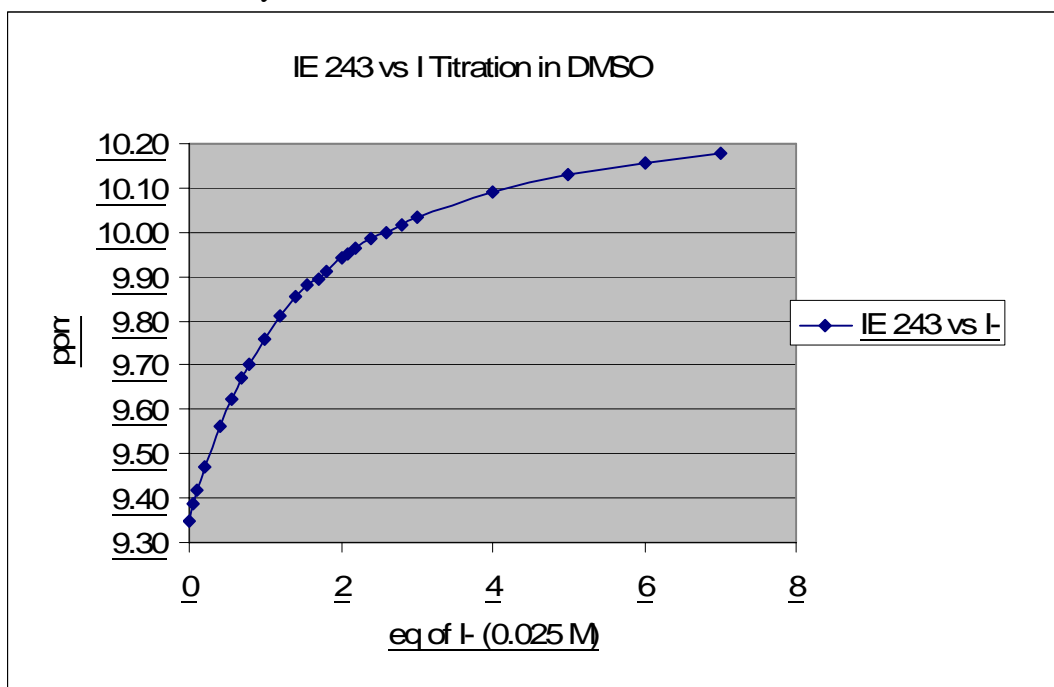

Graph 8 NMR titration shift graph.

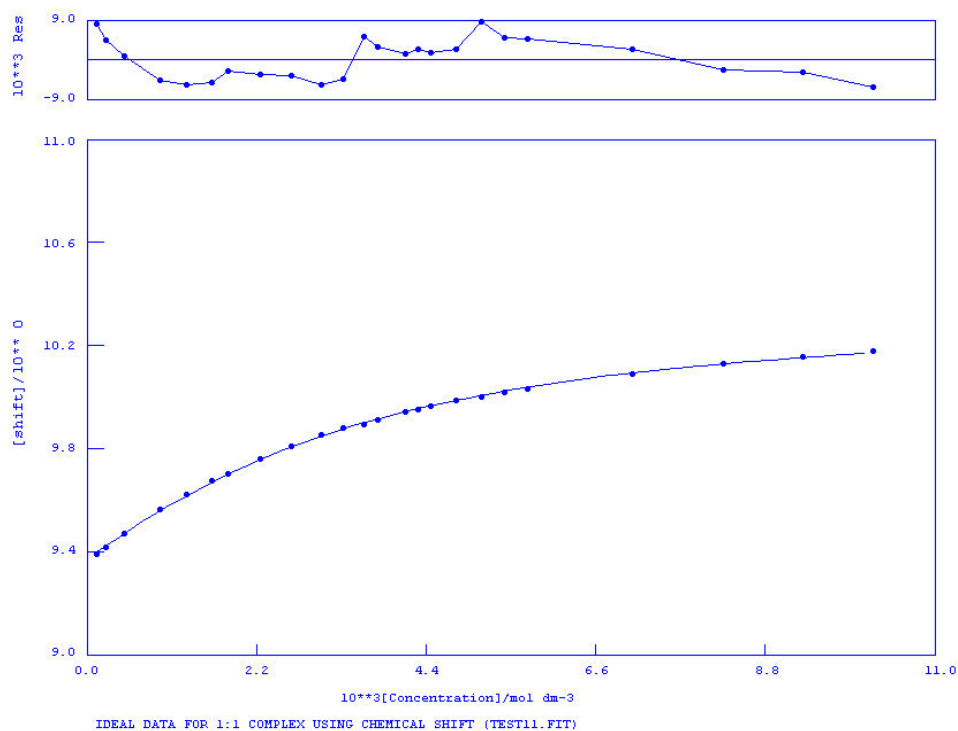

Fit 8 WinNMR fit.

➤ CH pyrrole

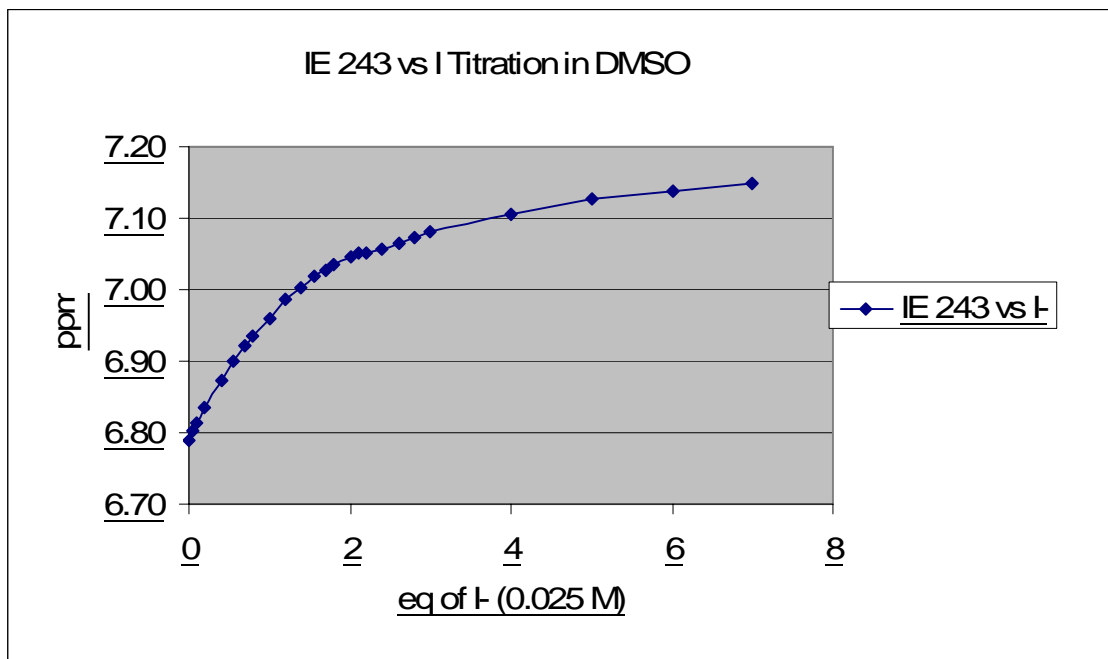

**Graph 9** NMR titration shift graph.

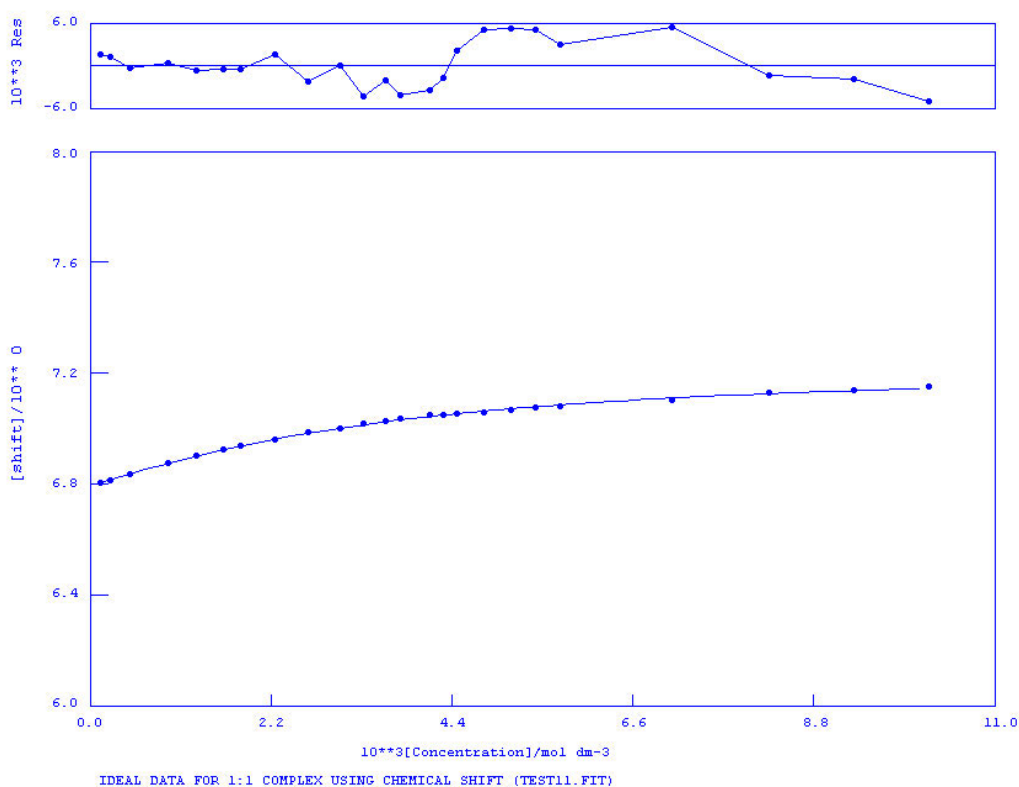

**Fit 9** WinNMR fit.

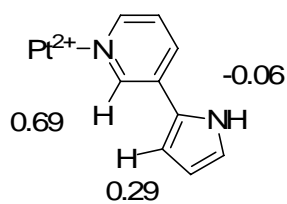

**Figure 8** Shift at 3 eq.

- Tetrabutylammonium bromide.
  - CH Pyridine

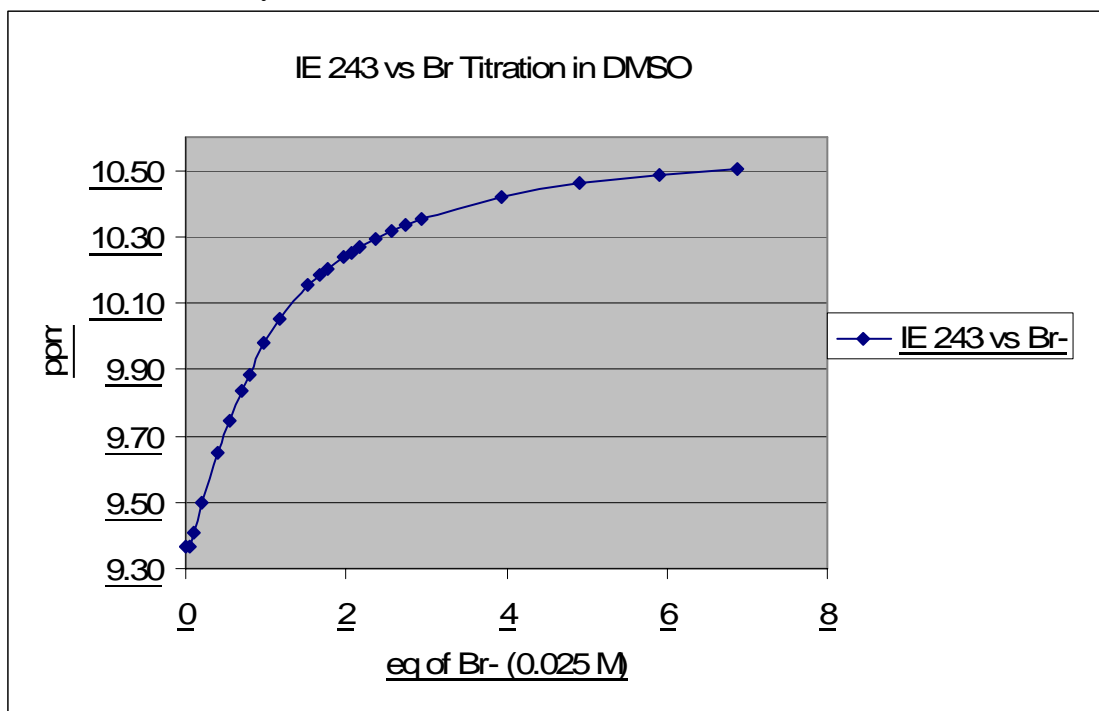

Graph 10 NMR titration shift graph.

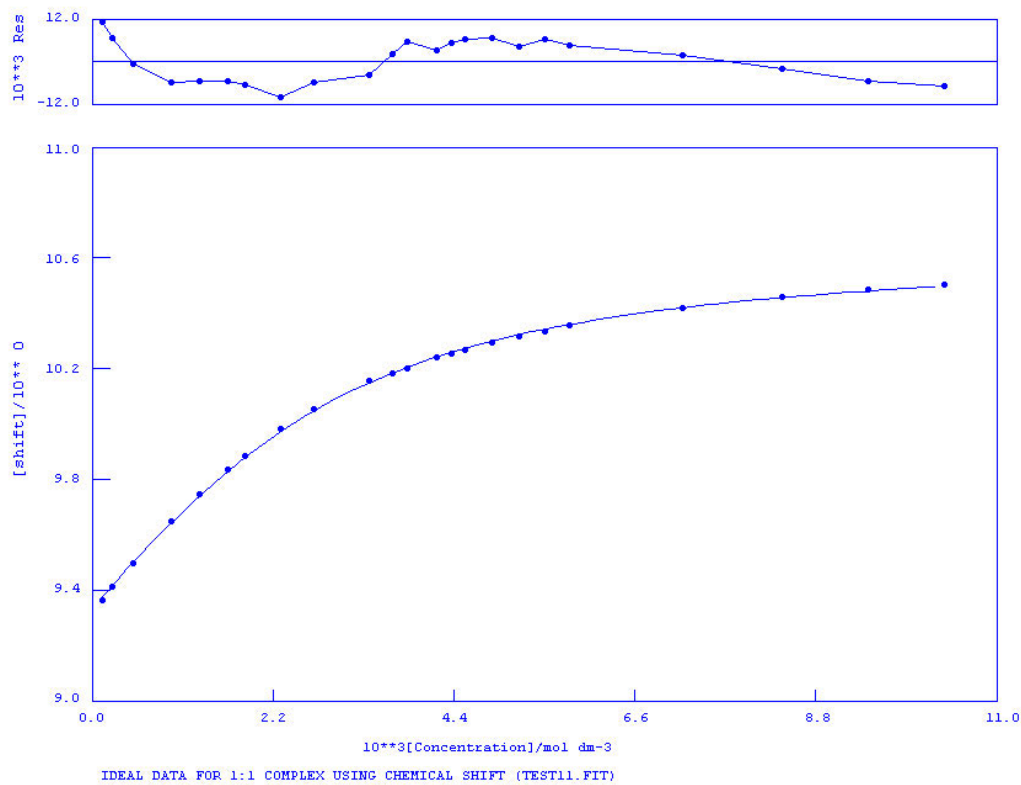

Fit 10 WinNMR fit.

➤ CH pyrrole

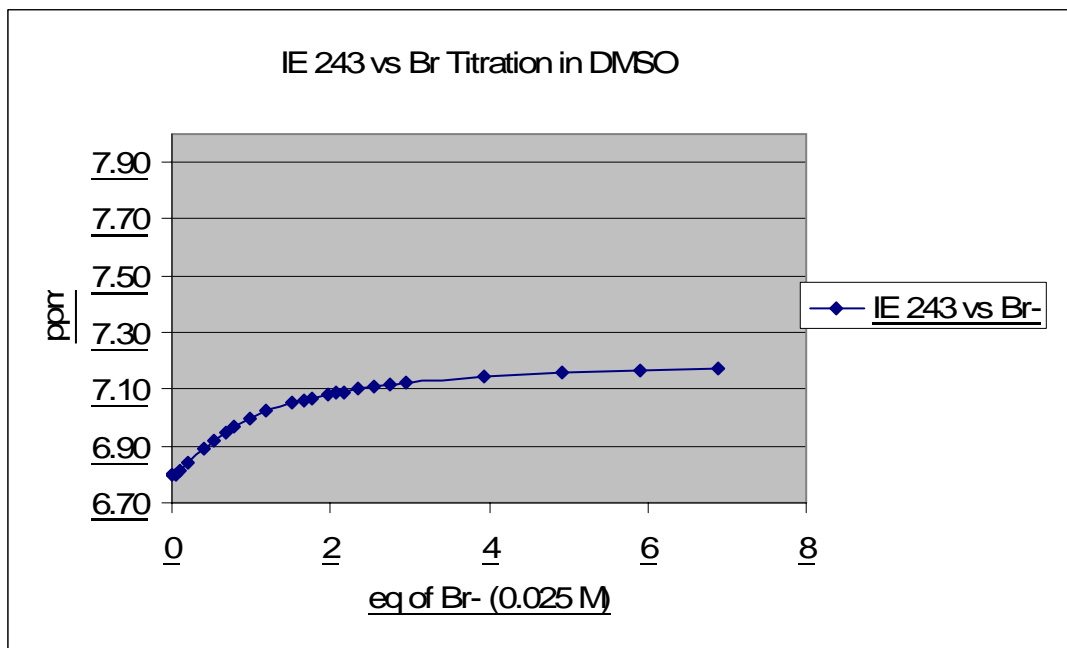

Graph 11 NMR titration shift graph.

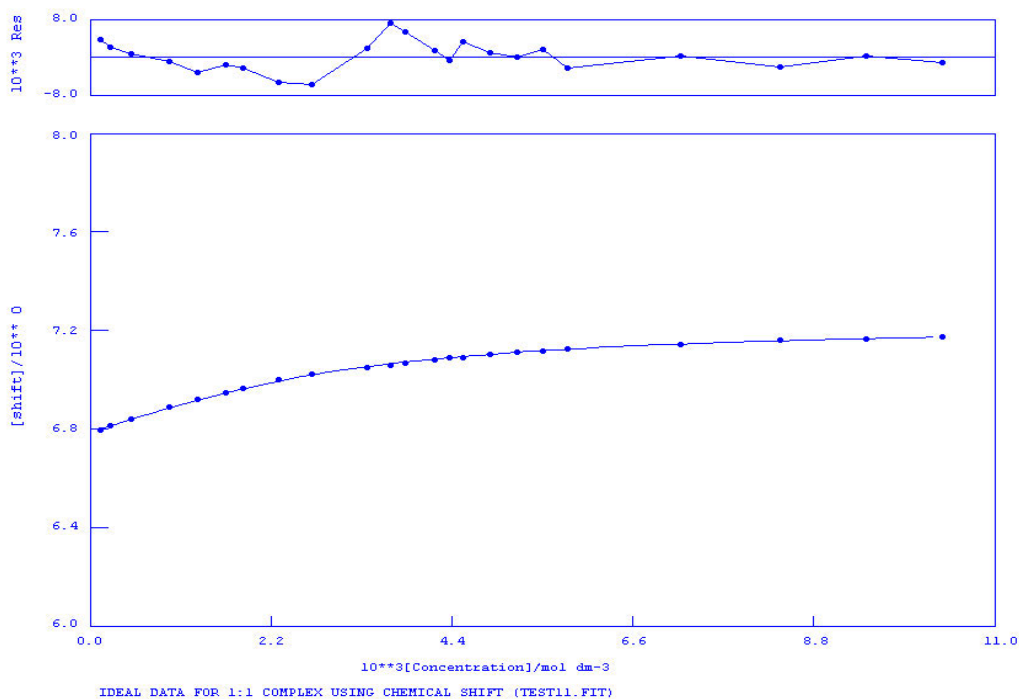

Fit 11 WinNMR fit.

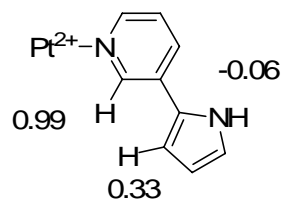

Figure 9 Shift at 3 eq.

- Tetrabutylammonium chloride.
  - CH Pyridine

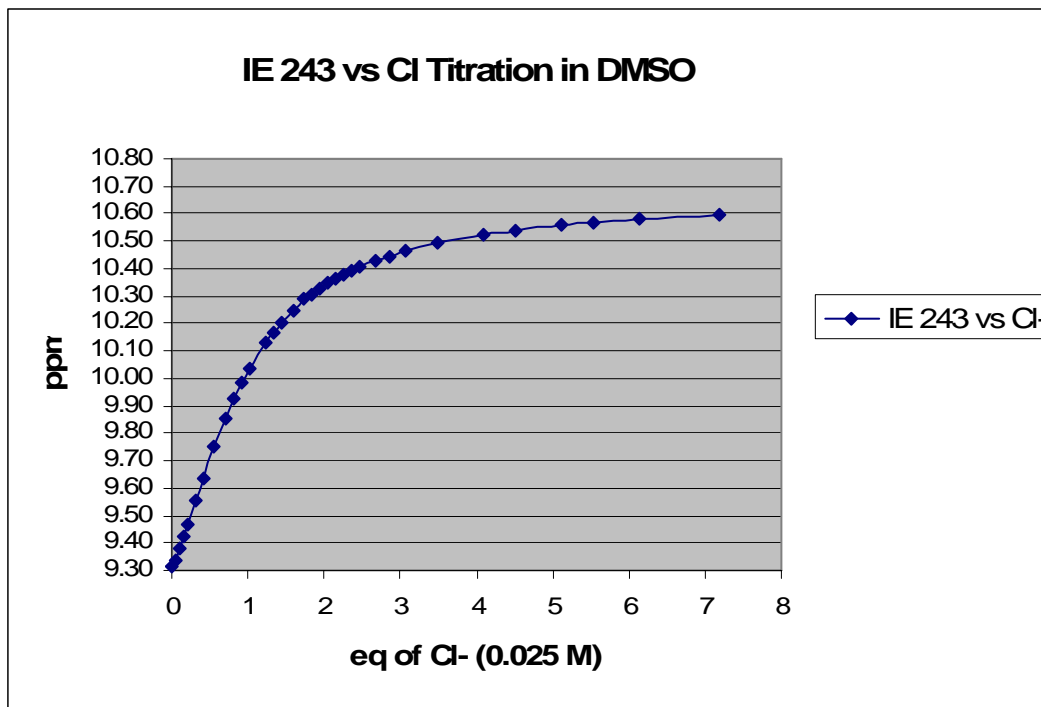

Graph 12 NMR titration shift graph.

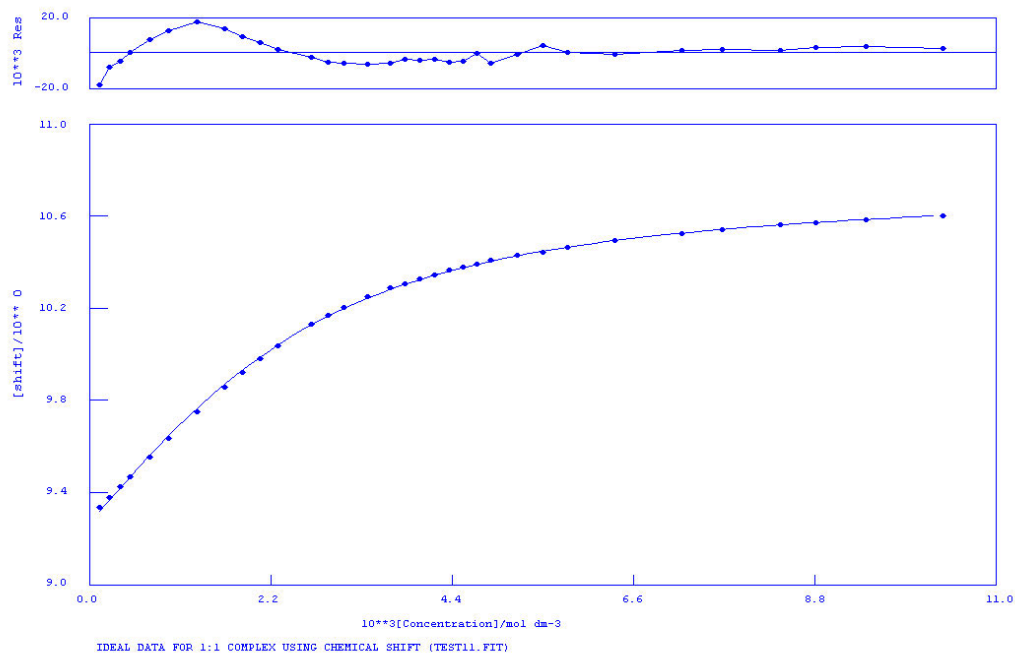

Fit 12 WinNMR fit.

➤ CH Pyrrole

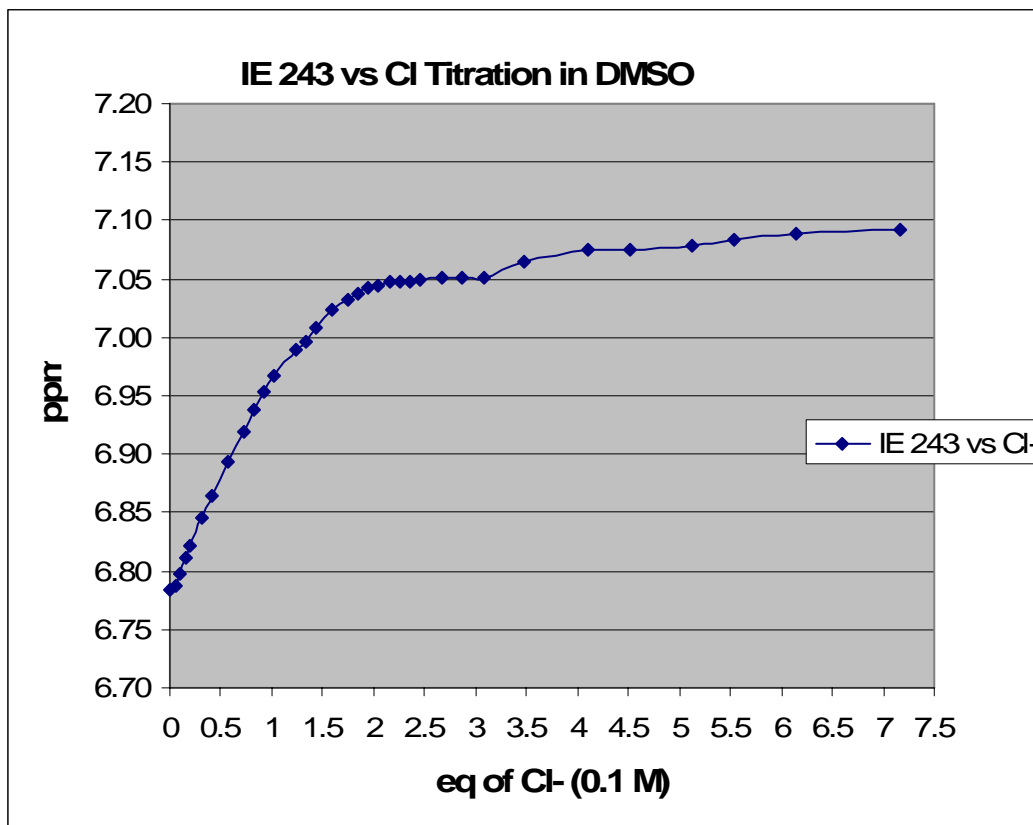

Graph 13 NMR titration shift graph.

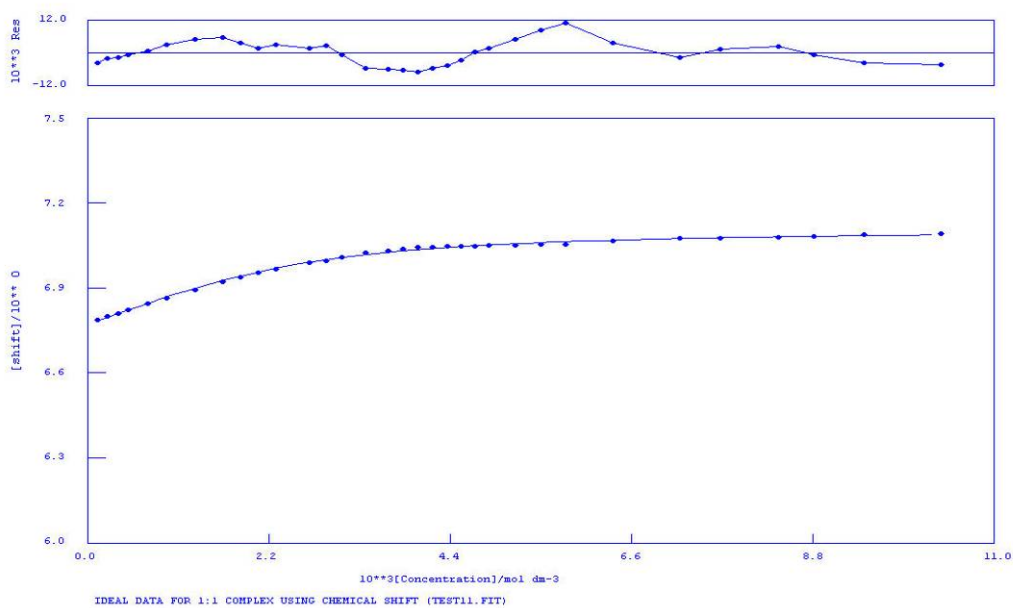

Fit 13 WinNMR fit.

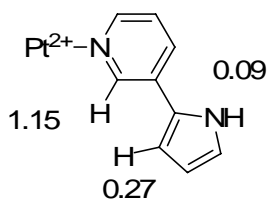

Figure 10 Shift at 3 eq.

- Tetrabutylammonium acetate.

➤ CH Pyridine

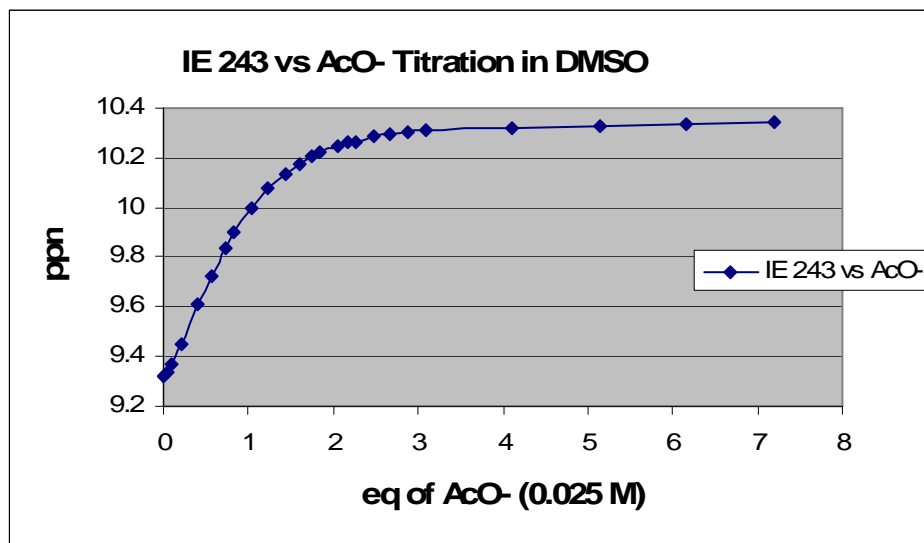

Graph 14 NMR titration shift graph.



➤ CH pyrrole

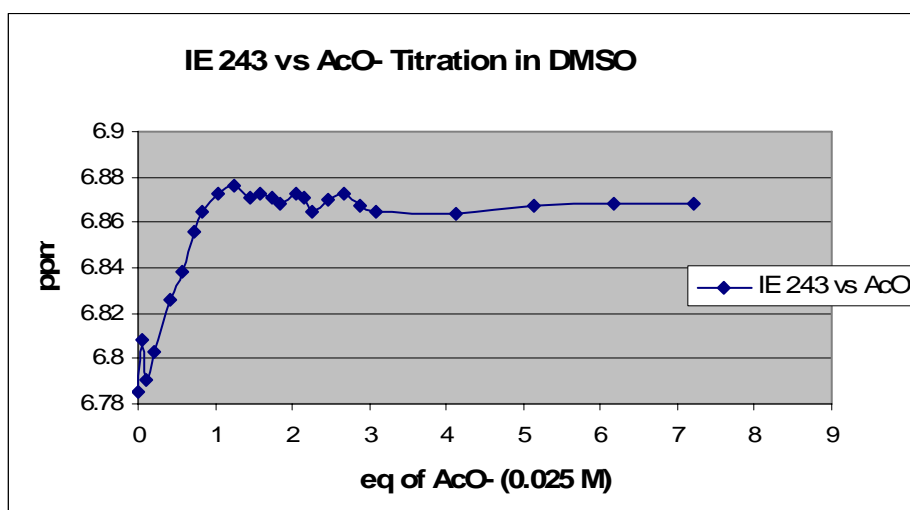

Graph 15 NMR titration shift graph.

➤ NH pyrrole

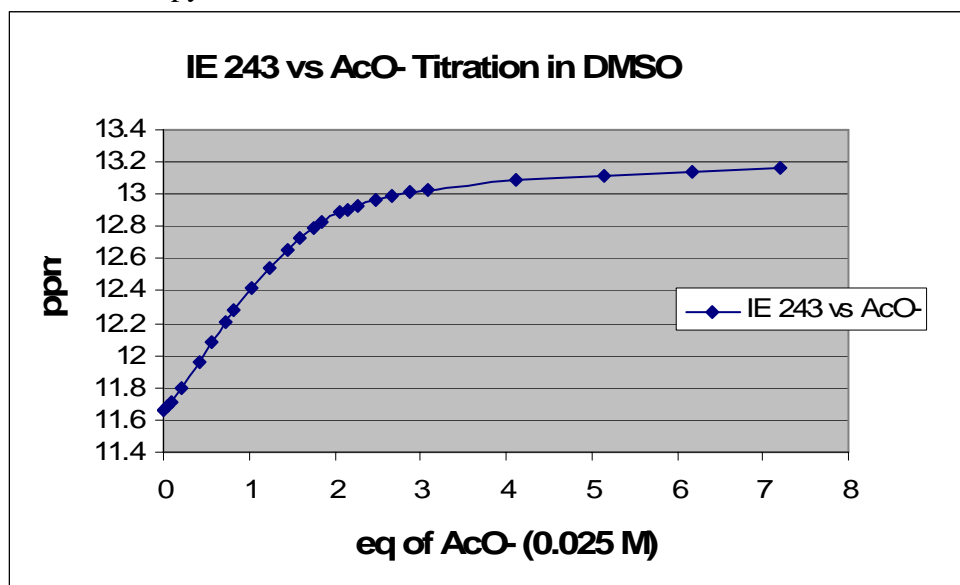

Graph 16 NMR titration shift graph.

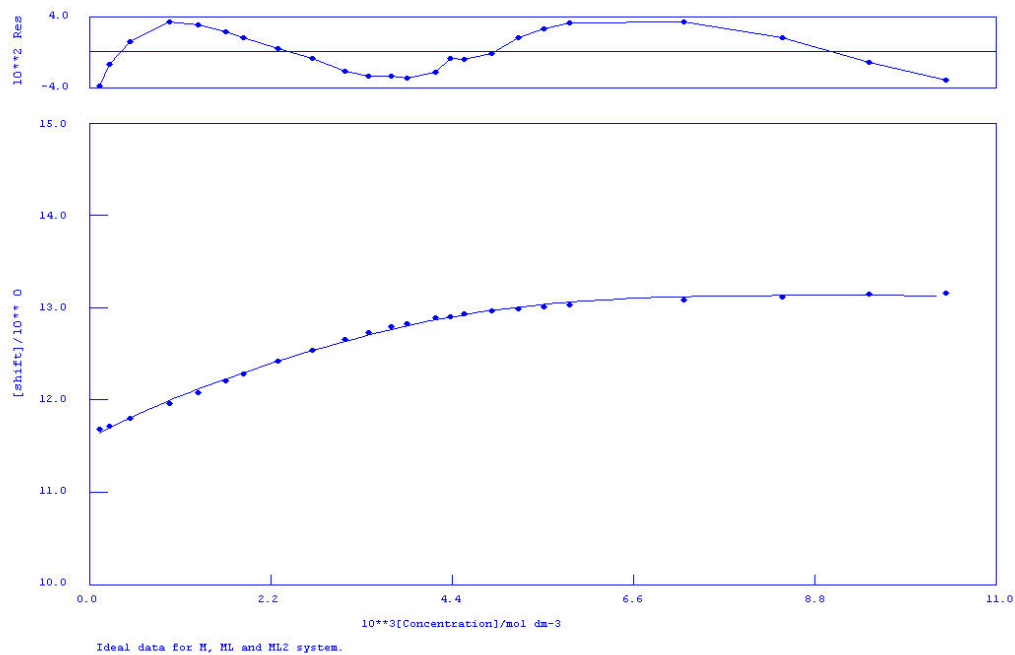

Fit 14 WinNMR fit.

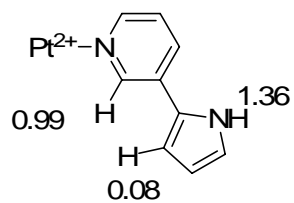

Figure 11 Shift at 3 eq.

- Tetrabutylammonium benzoate.
  - CH Pyridine

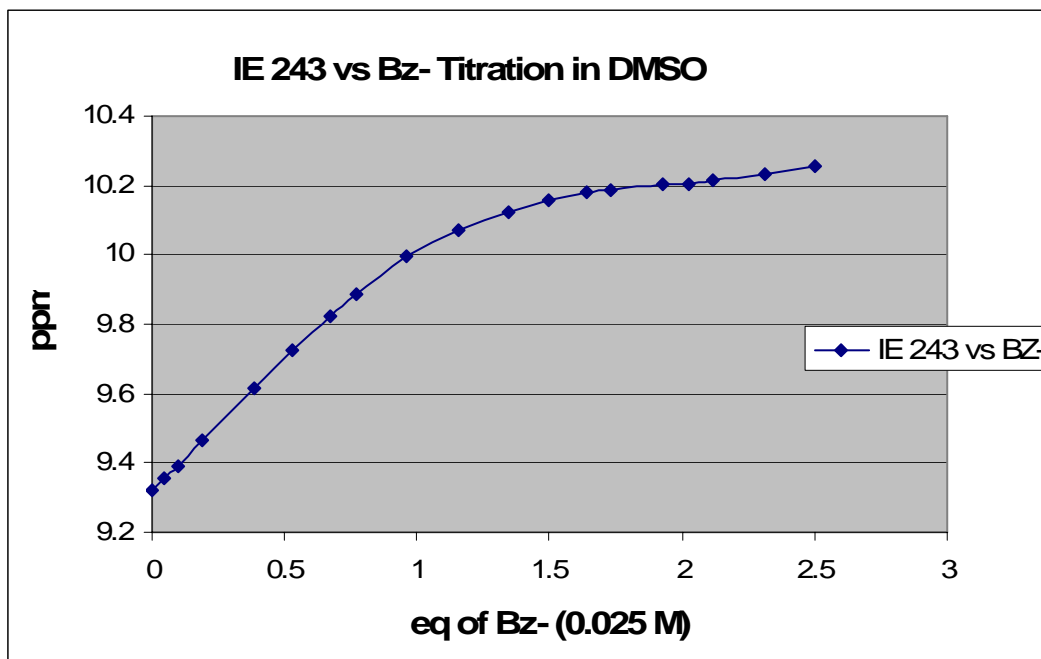

Graph 17 NMR titration shift graph.

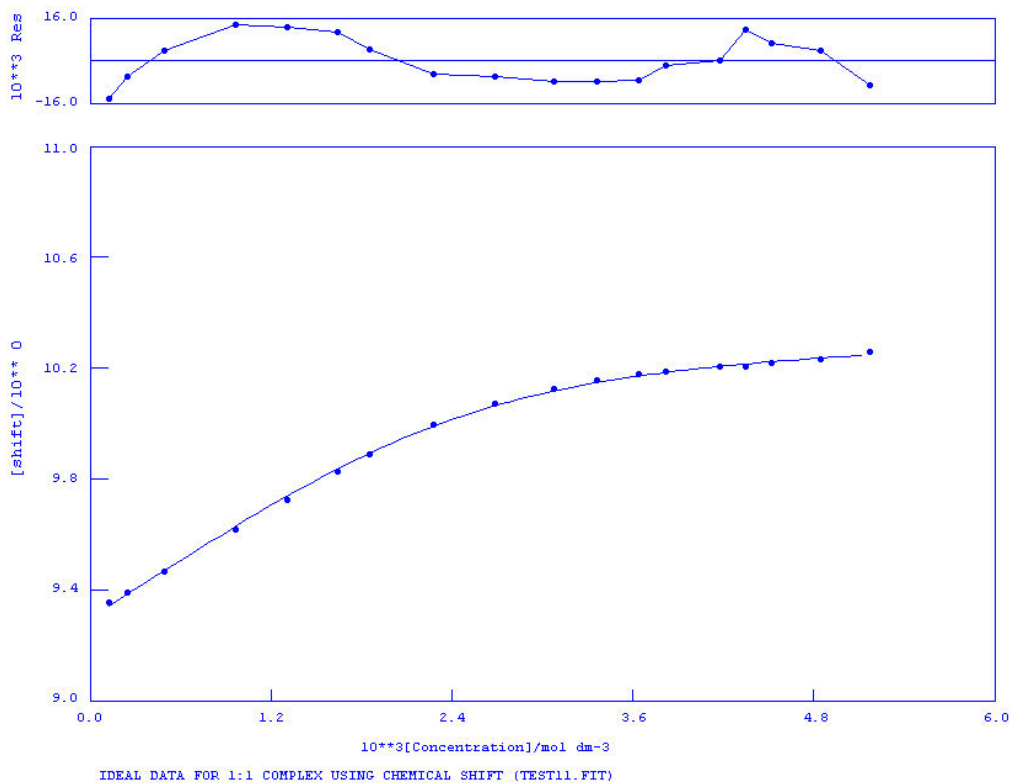

Fit 15 WinNMR fit.

➤ CH pyrrole

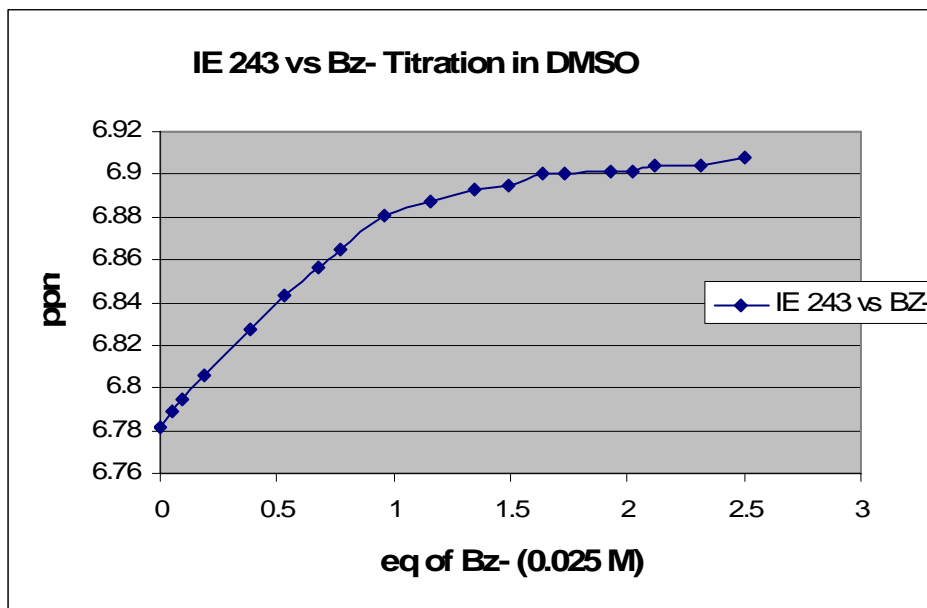

Graph 18 NMR titration shift graph.

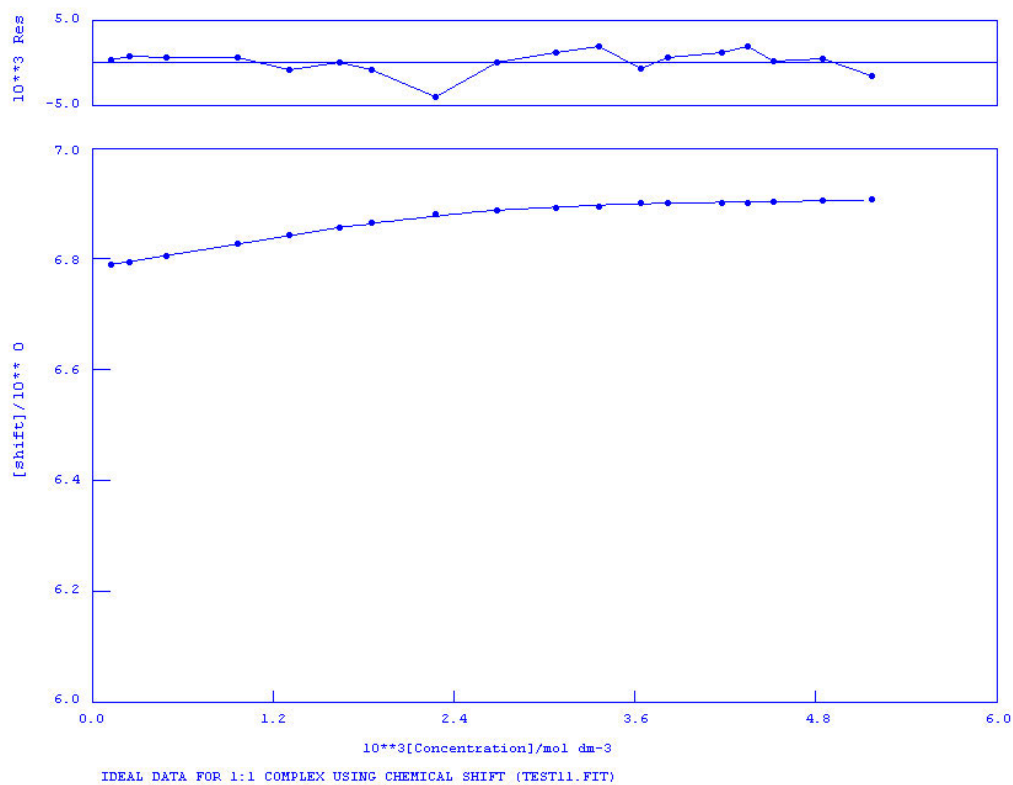

Fit 16 WinNMR fit.

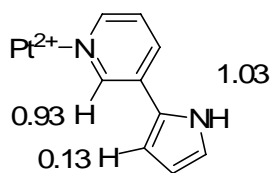

Figure 12 Shift at 2.5 eq.

- Tetrabutylammonium hydrogensulfate.
  - CH Pyridine

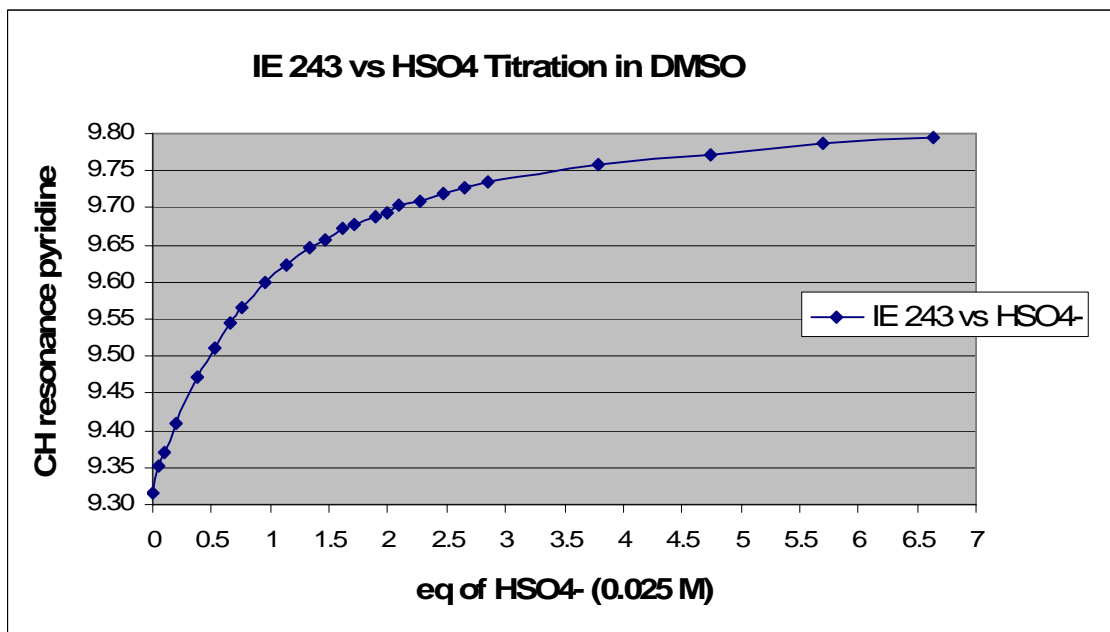

Graph 19 NMR titration shift graph.

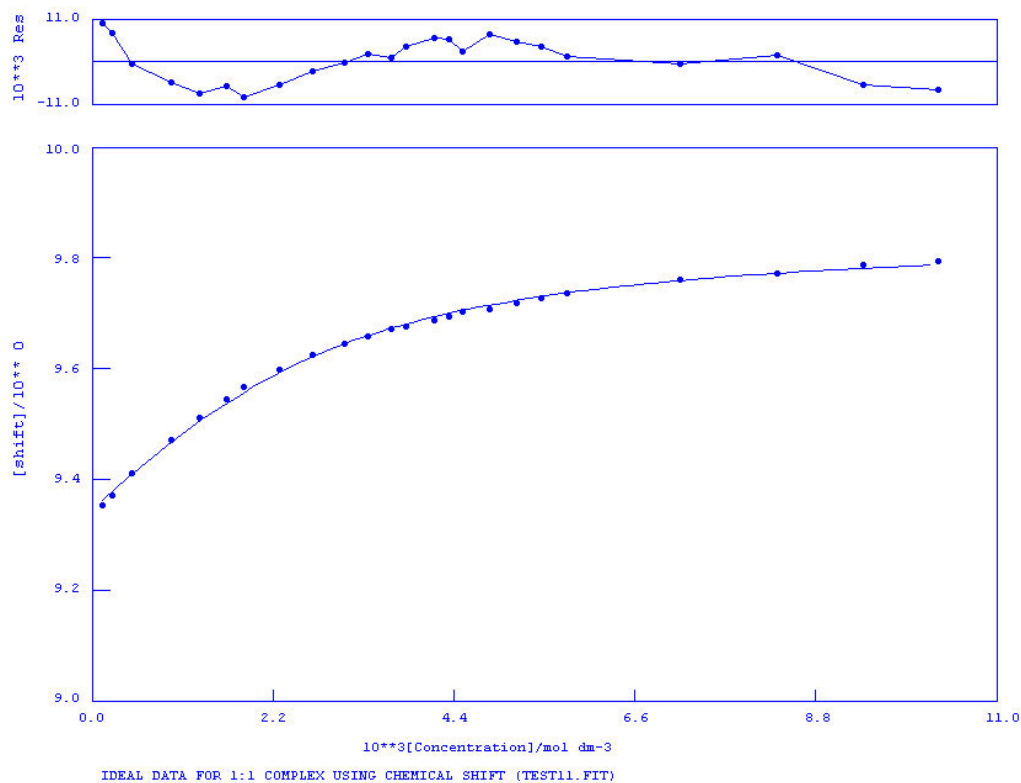

Fit 17 WinNMR fit.

➤ CH Pyrrole

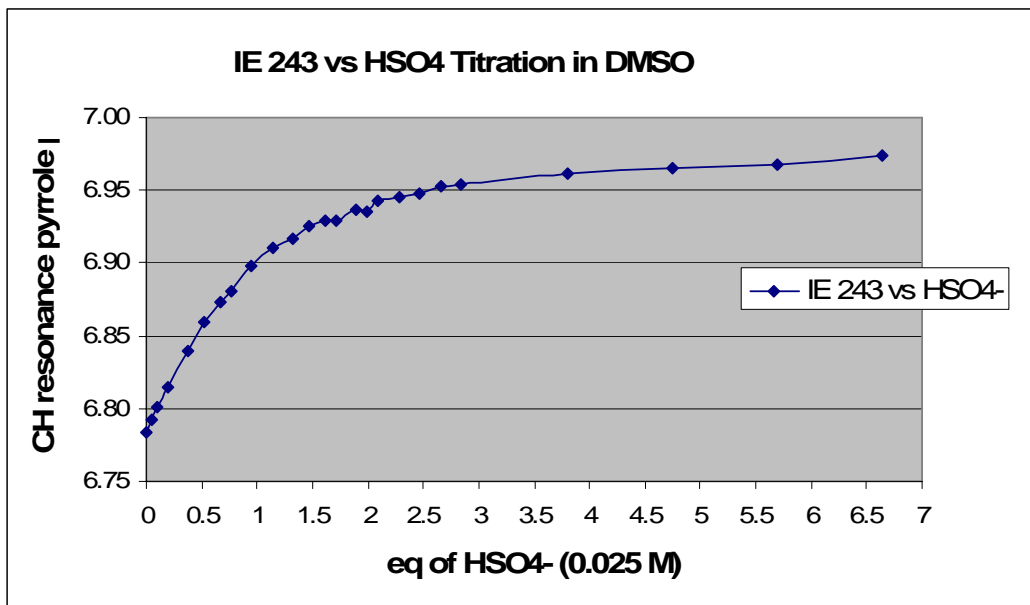

Graph 20 NMR titration shift graph.

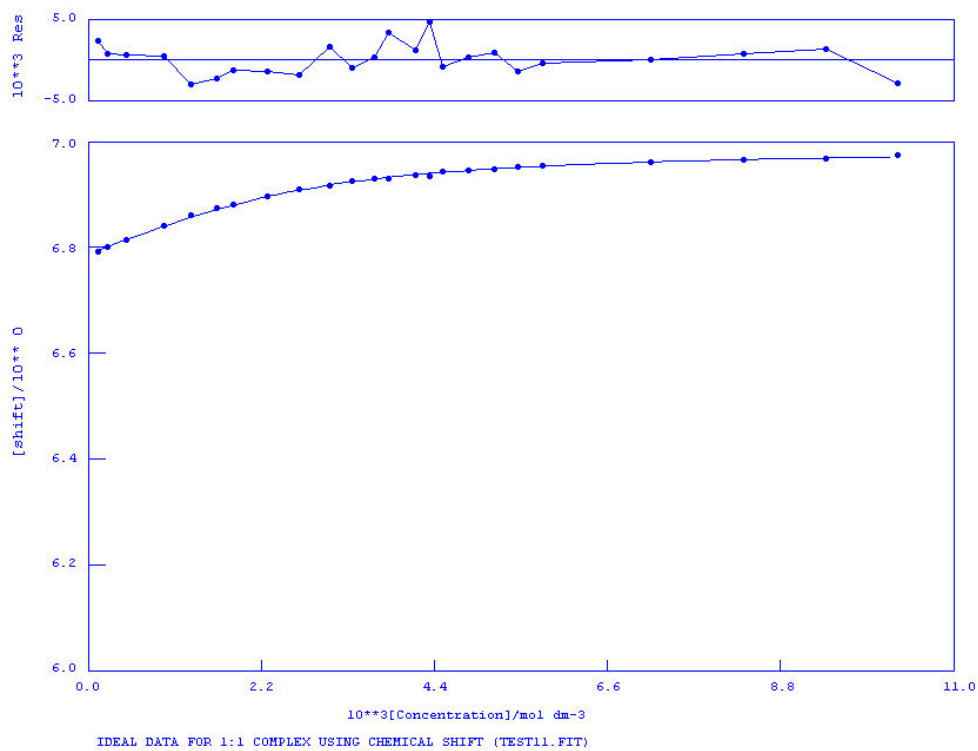

Fit 18 WinNMR fit.

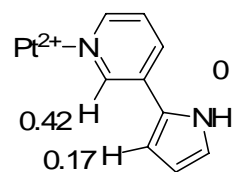

Figure 13 Shift at 3 eq.

- Tetrabutylammonium methanesulfonate.
  - CH Pyridine

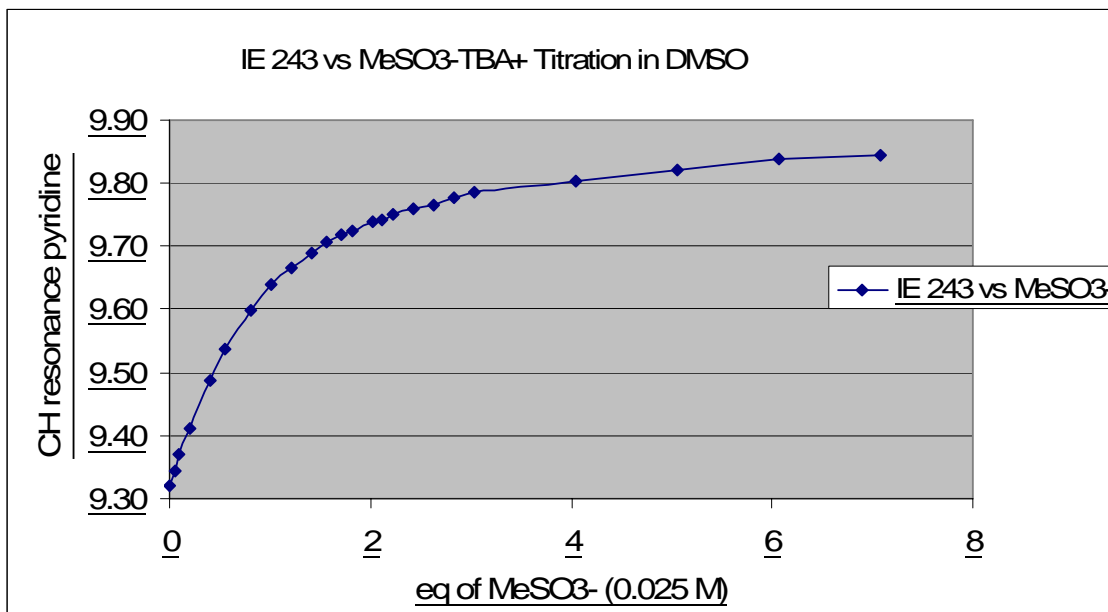

Graph 21 NMR titration shift graph.

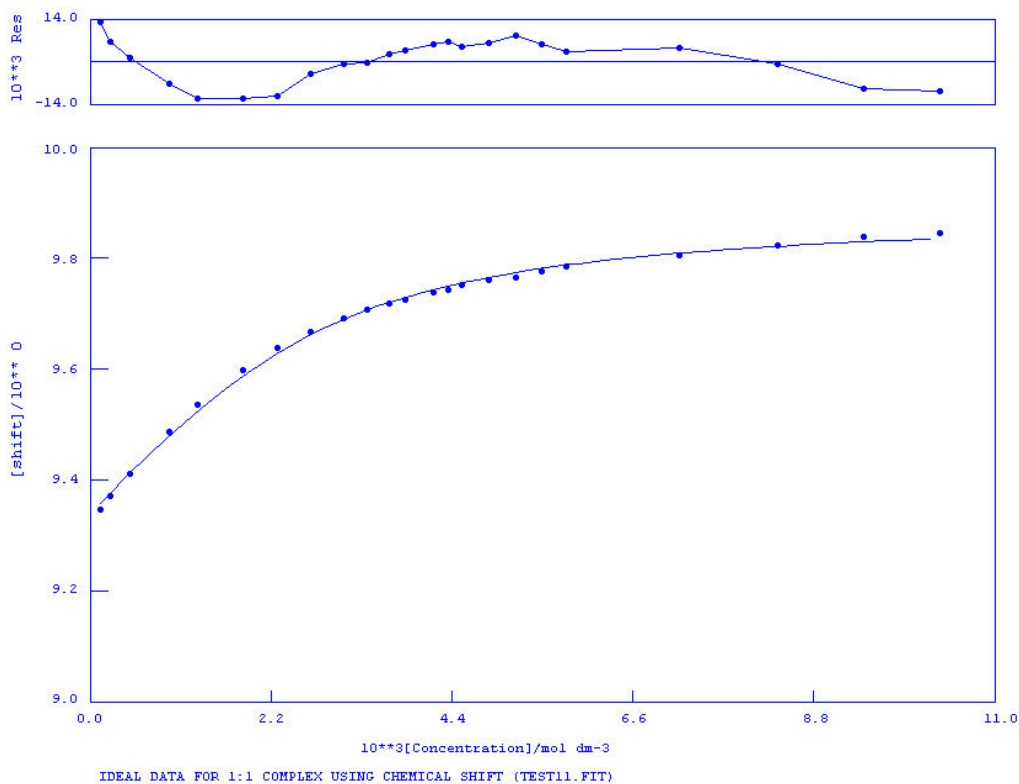

Fit 19 WinNMR fit.

➤ CH Pyrrole

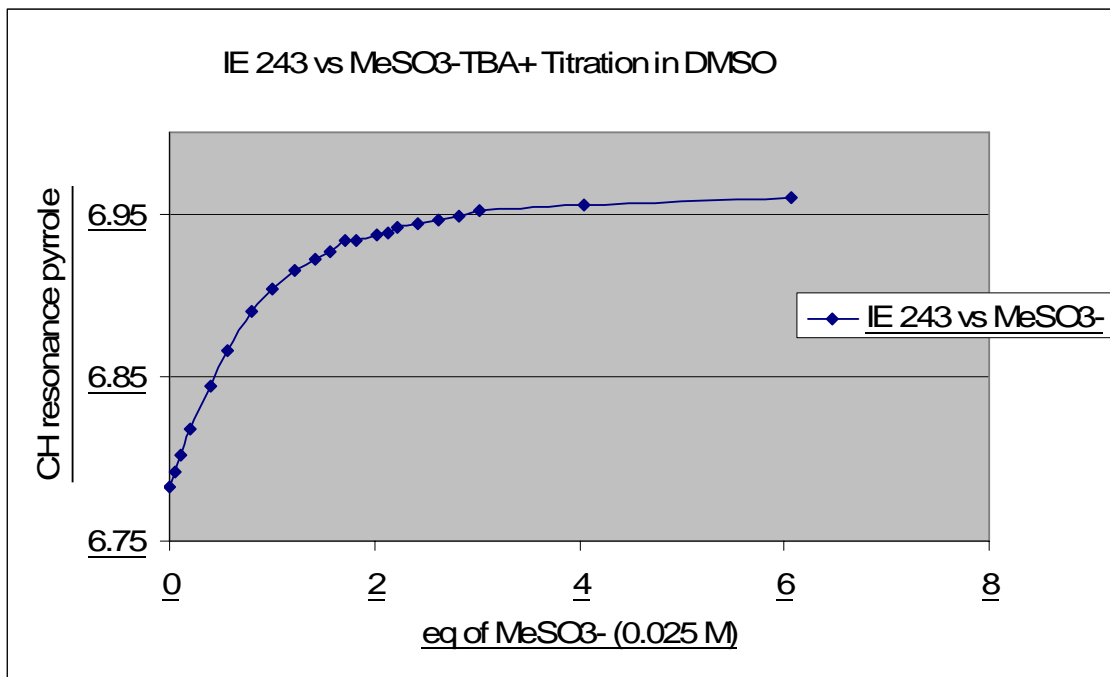

Graph 22 NMR titration shift graph.

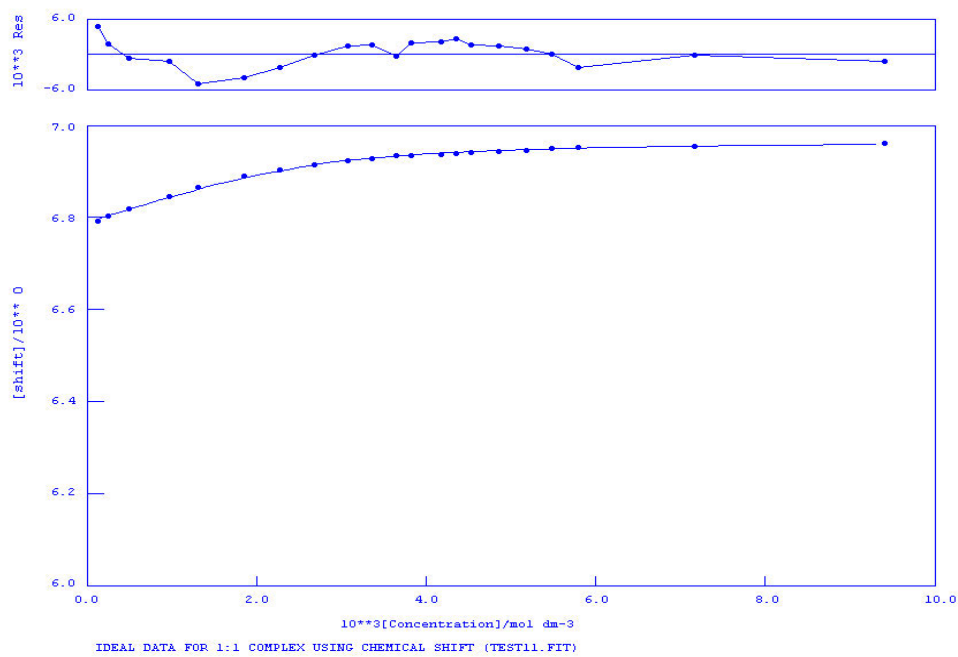

Fit 20 WinNMR fit.

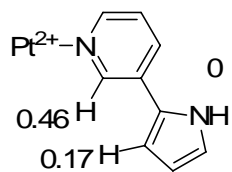

Figure 14 Shift at 3 eq.



- Tetrabutylammonium nitrate.

➤ CH Pyridine

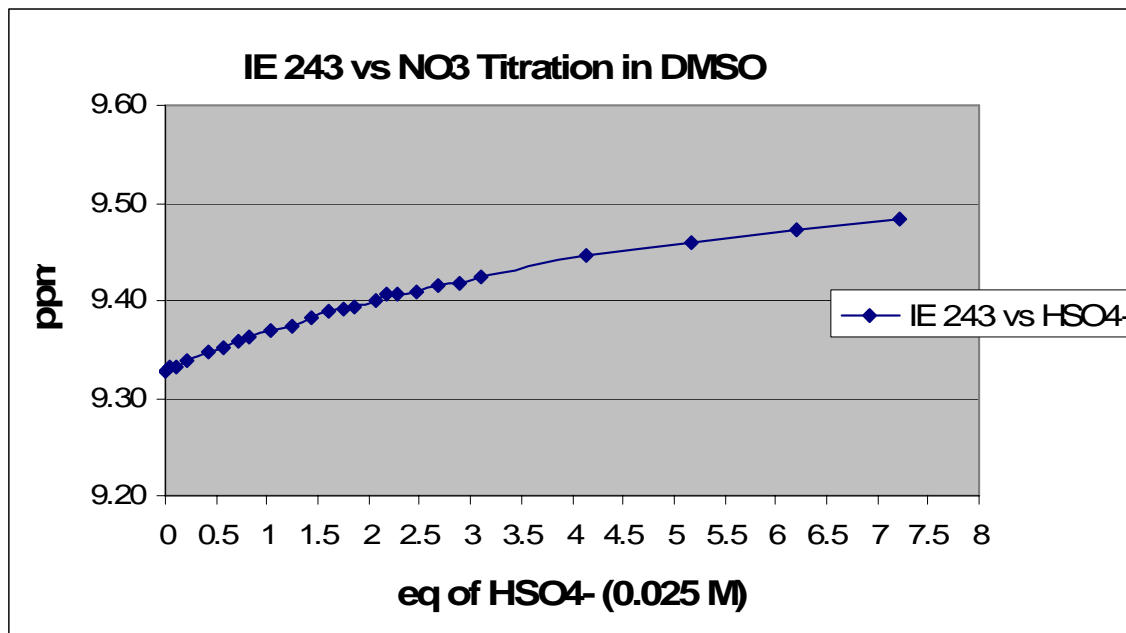

Graph 23 NMR titration shift graph.

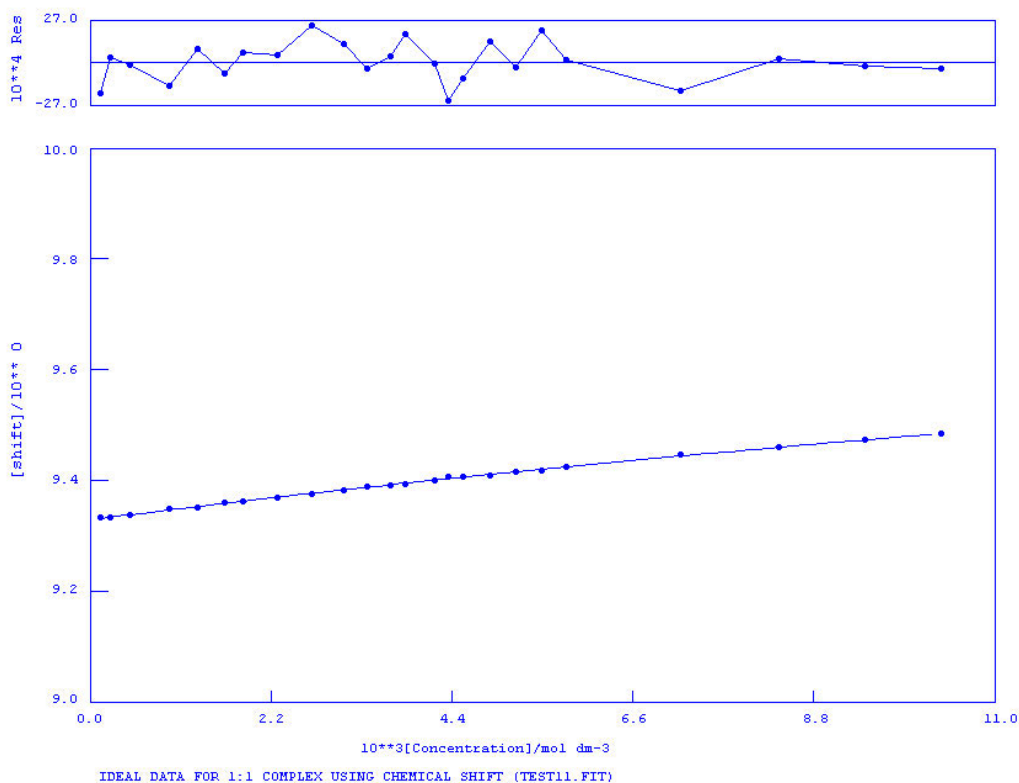

Fit 21 WinNMR fit.

➤ CH Pyrrole

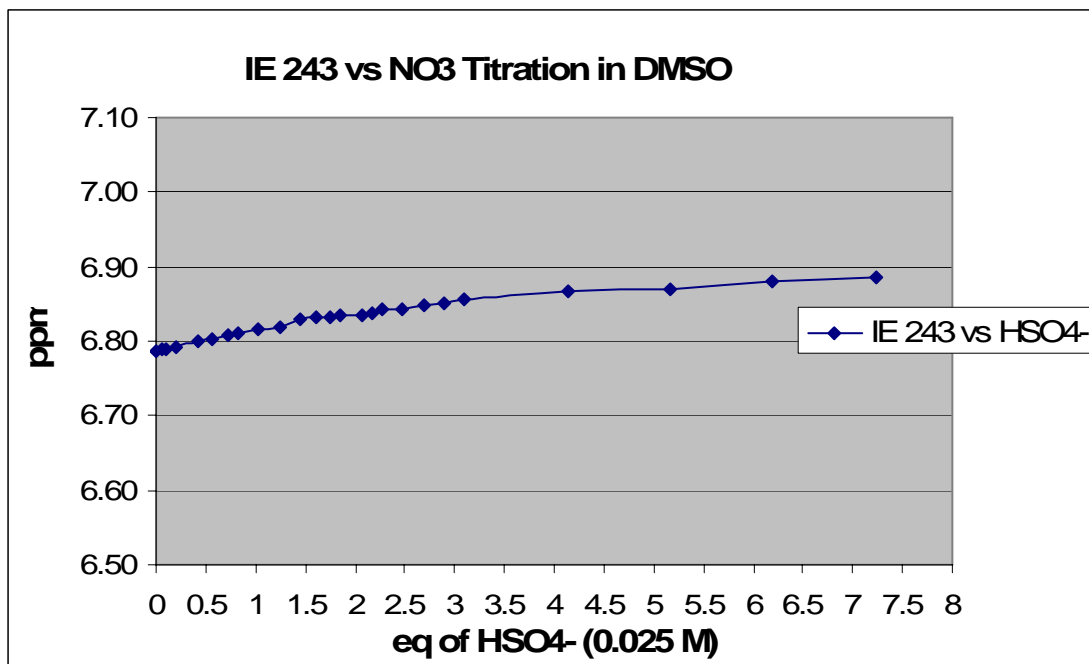

Graph 24 NMR titration shift graph.

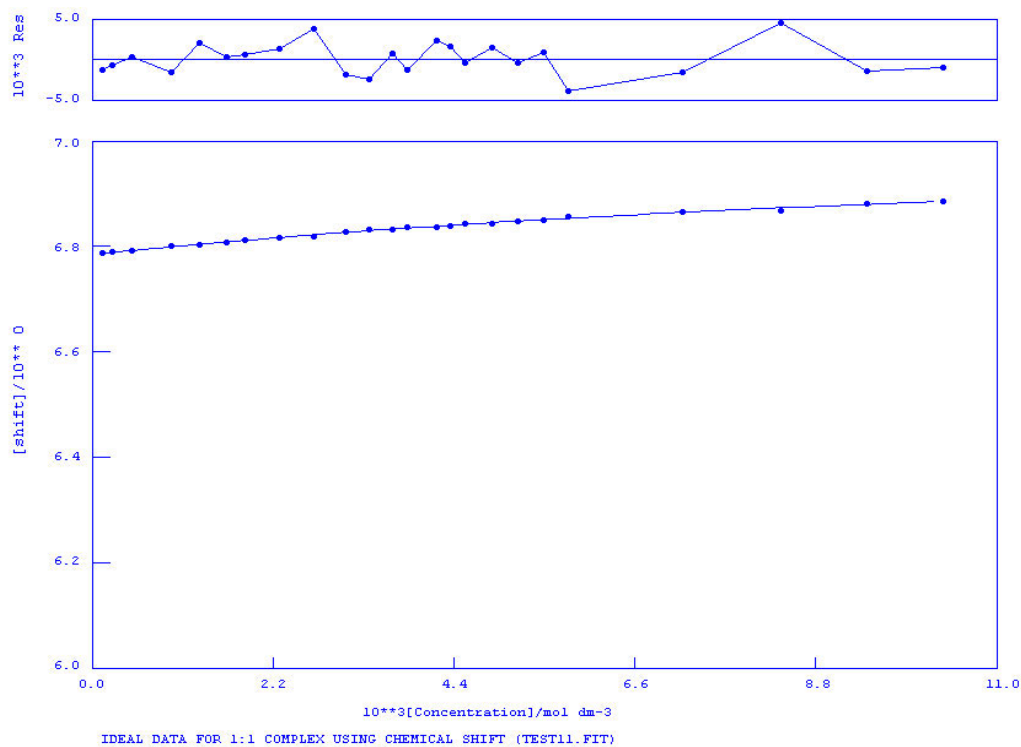

Fit 22 WinNMR fit.

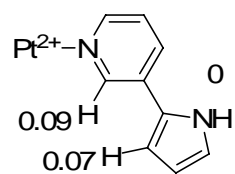

Figure 15 Shift at 3 eq.

- Tetrabutylammonium triflate.

➤ CH Pyridine

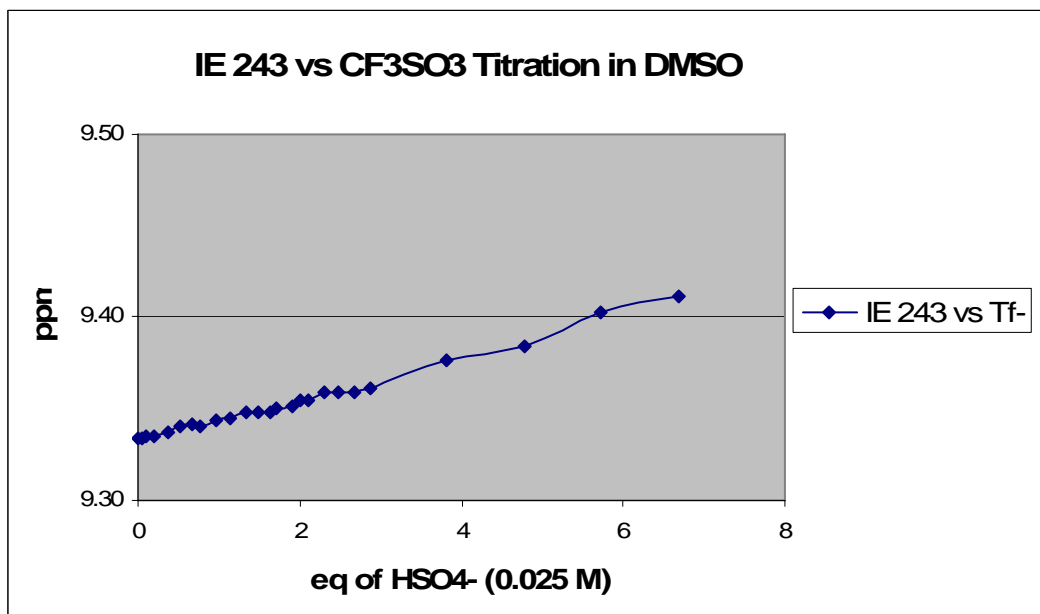

Graph 25 NMR titration shift graph.

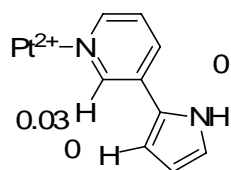

Figure 16 Shift at 3 eq.

Titration tetrakis(p-(1H-pyrrole)pyridine)platinum(II) tetrafluoroborate **3**.

- Tetrabutylammonium iodide.

➤ CH $\alpha$  Pyridine

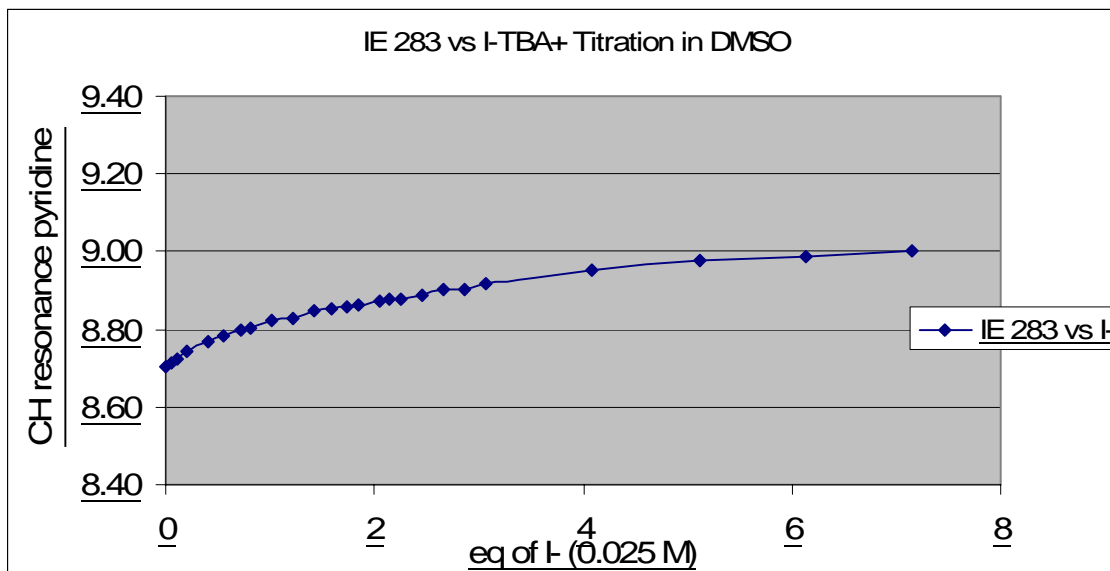

Graph 26 NMR titration shift graph.

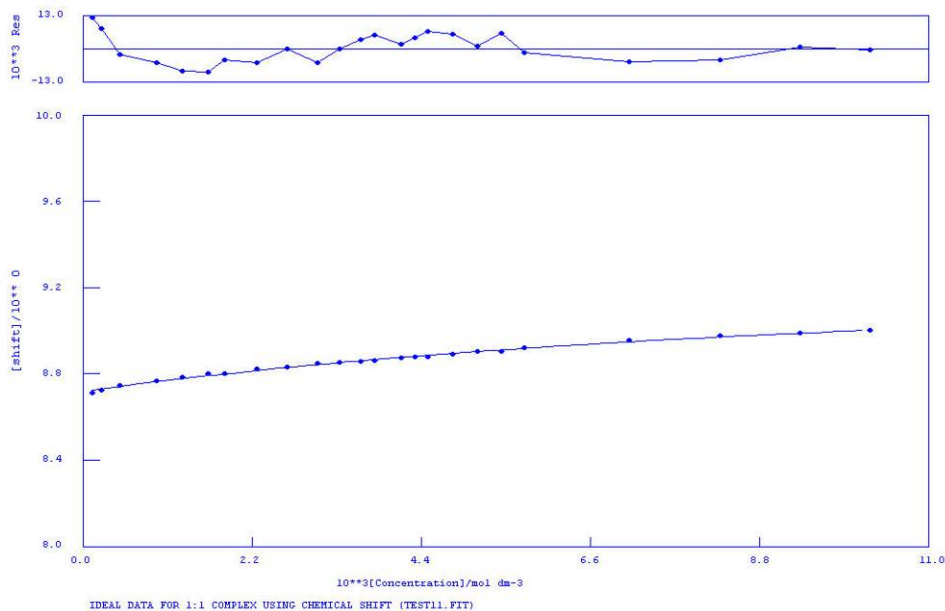

Fit 23 WinNMR fit.

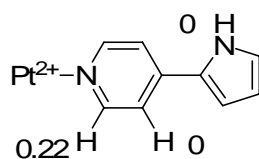

Figure 17 Shift at 3 eq.

- Tetrabutylammonium bromide.

➤ CH $\alpha$  Pyridine

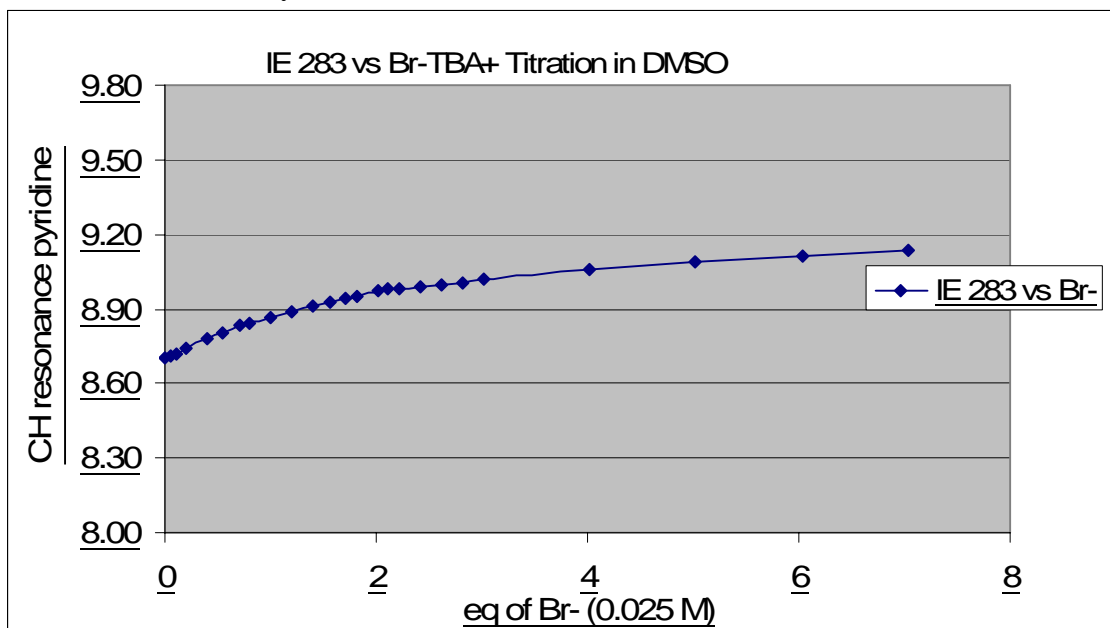

Graph 27 NMR titration shift graph.

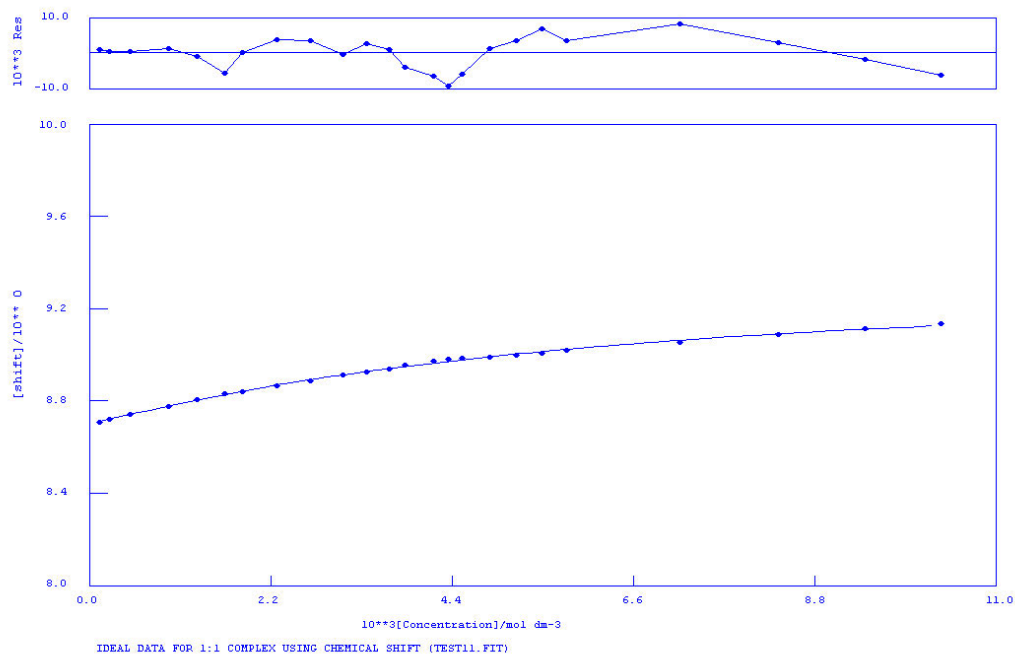

Fit 24 WinNMR fit.

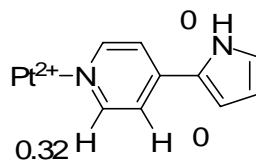

Figure 18 Shift at 3 eq.

- Tetrabutylammonium chloride.

➤ CH $\alpha$  Pyridine

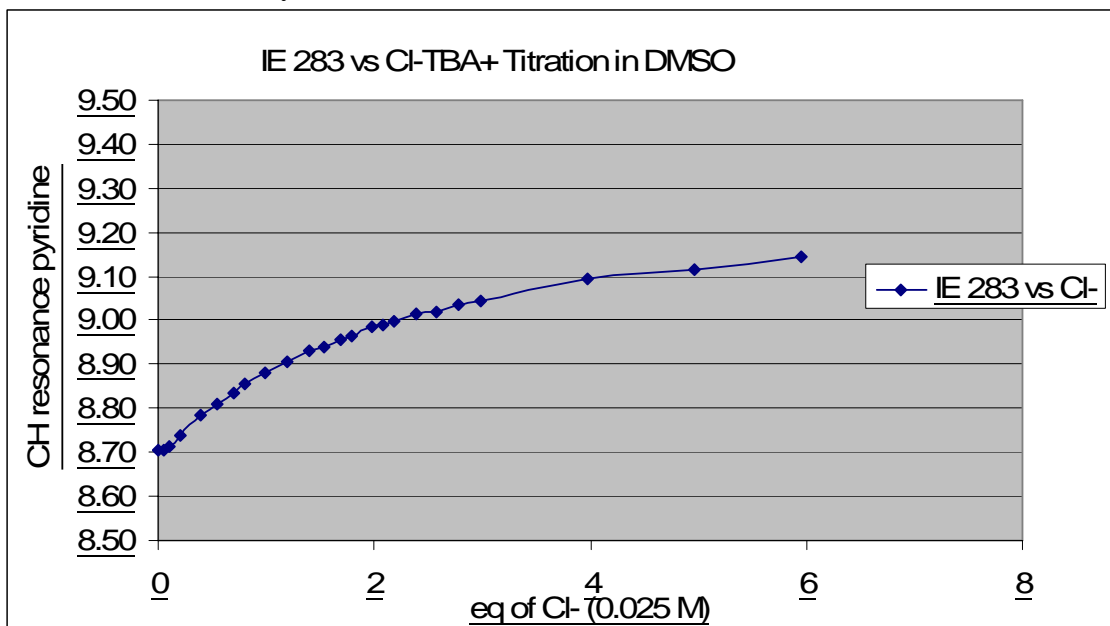

Graph 28 NMR titration shift graph.

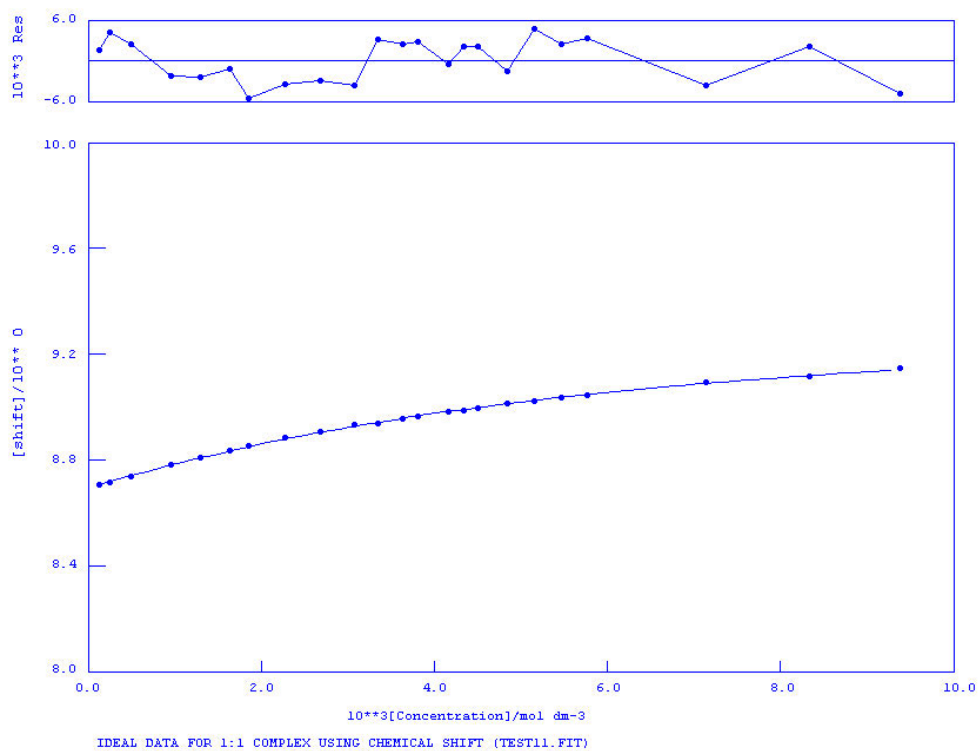

Fit 25 WinNMR fit.

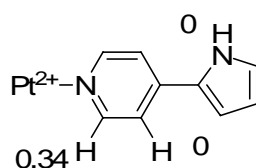

Figure 19 Shift at 3 eq.

- Tetrabutylammonium hydrogensulfate.
  - CH $\alpha$  Pyridine

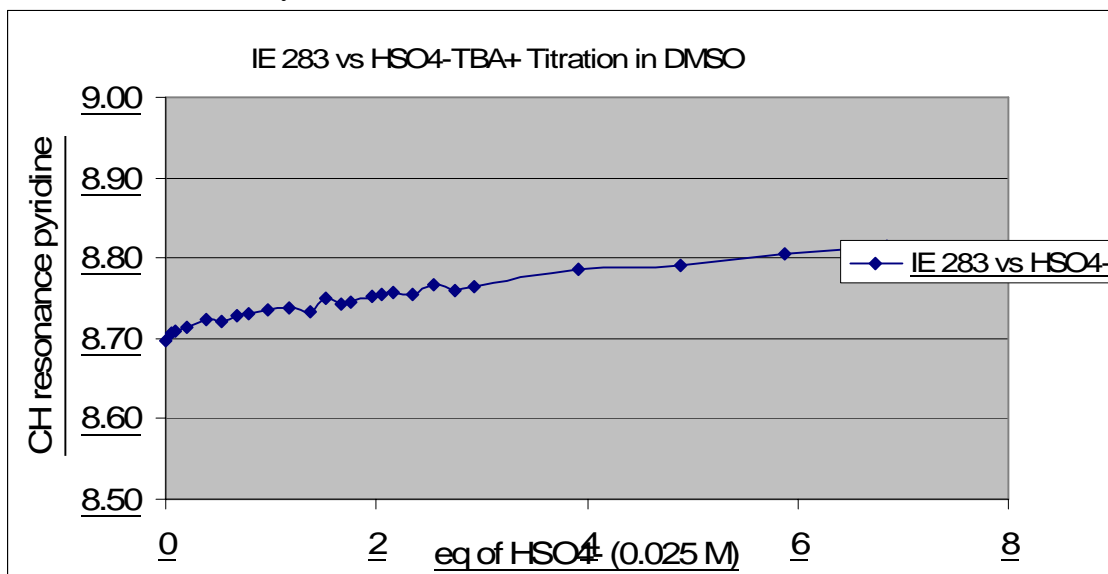

Graph 29 NMR titration shift graph.

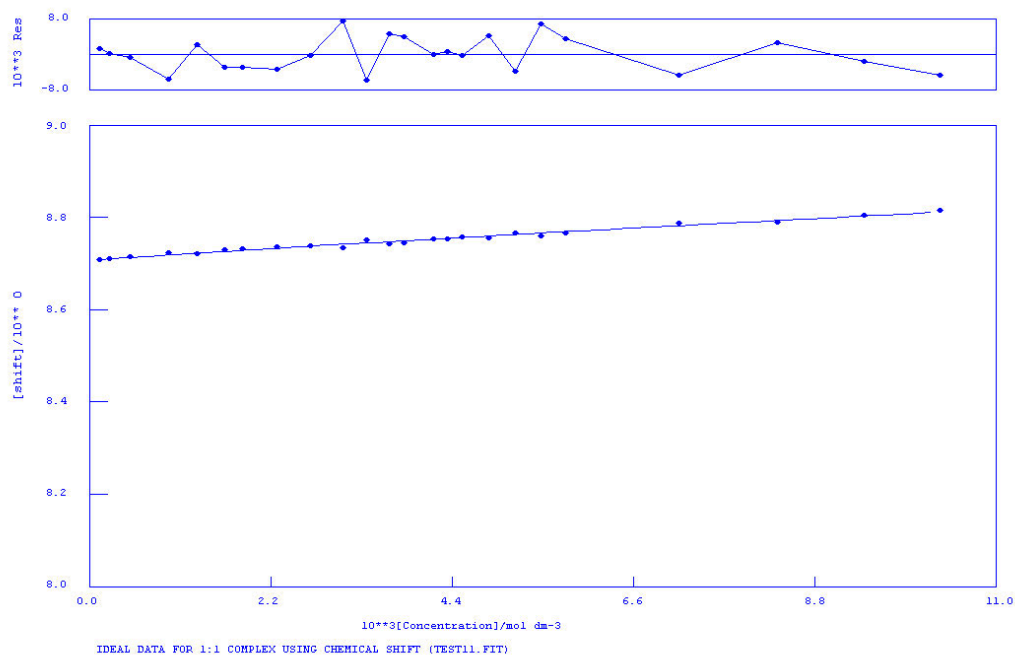

Fit 26 WinNMR fit.

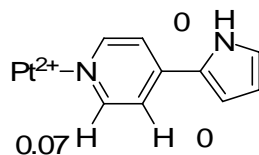

Figure 20 Shift at 3 eq.

- Tetrabutylammonium nitrate.

➤ CH $\alpha$  Pyridine

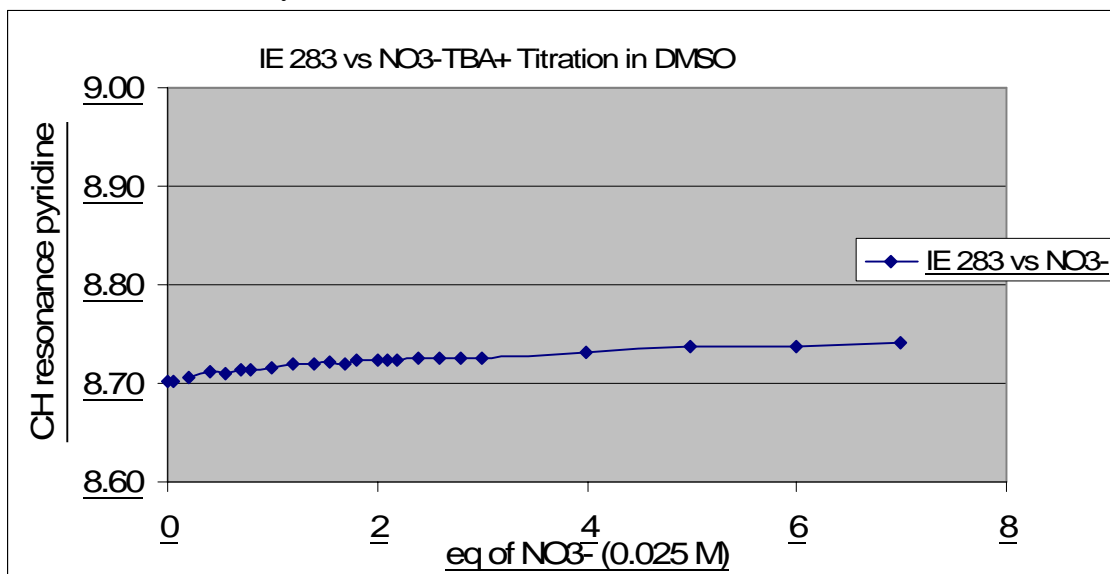

Graph 30 NMR titration shift graph.

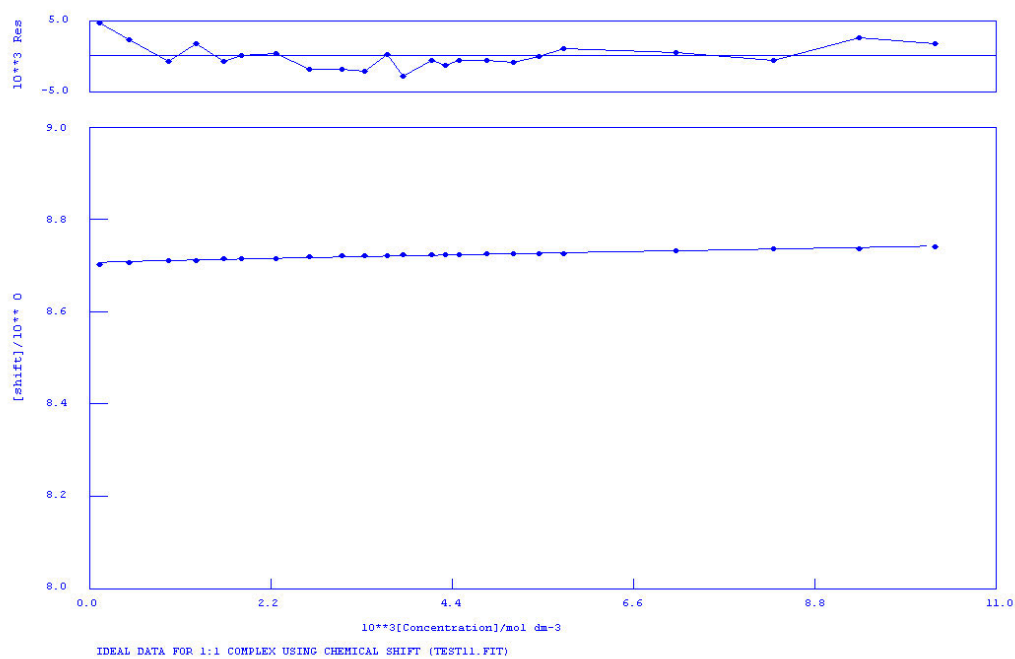

Fit 27 WinNMR fit.

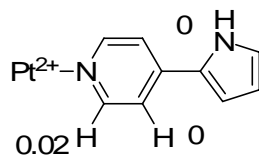

Figure 21 Shift at 3 eq.



- Tetrabutylammonium methanesulfonate.

➤ CH $\alpha$  Pyridine

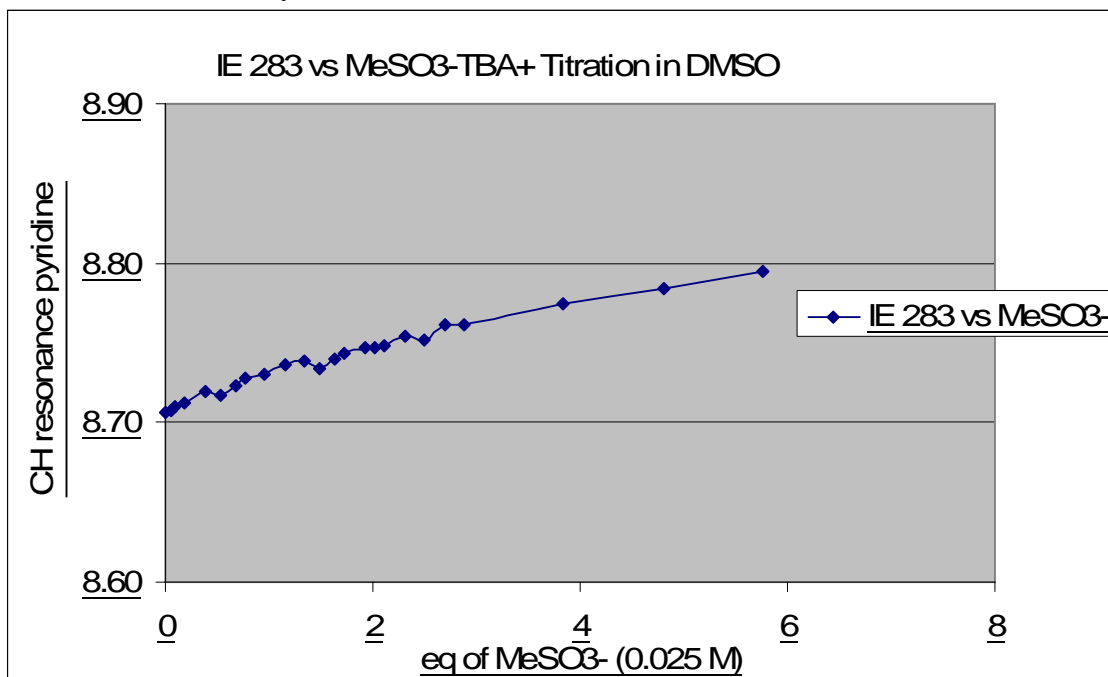

Graph 31 NMR titration shift graph.

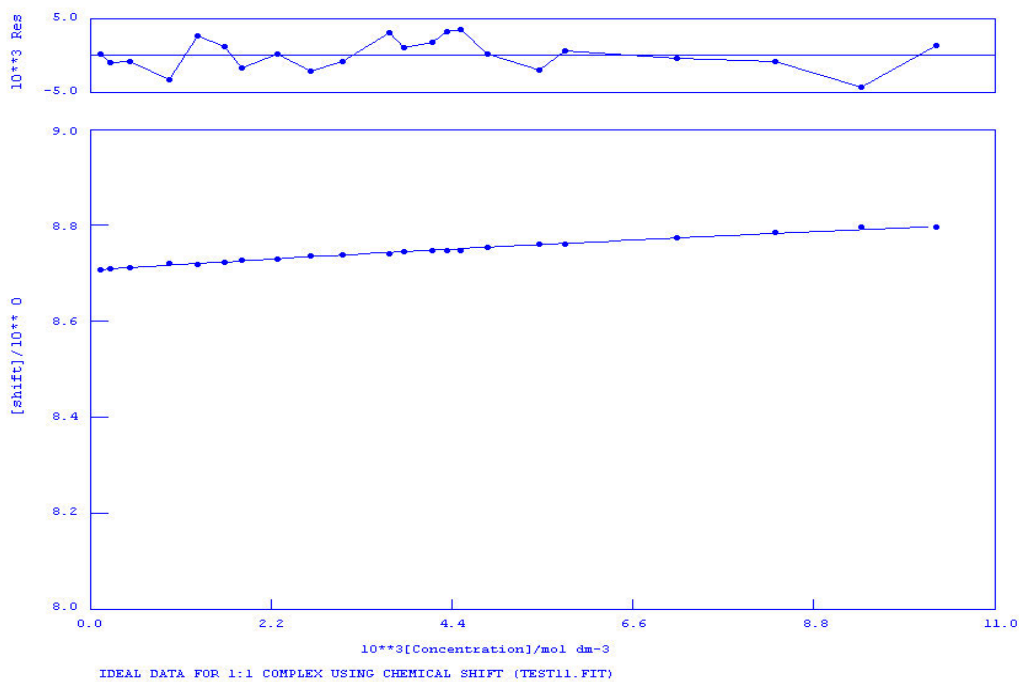

Fit 28 WinNMR fit.

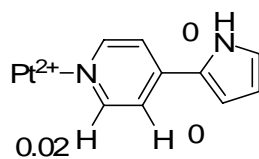

Figure 22 Shift at 3 eq.

- Tetrabutylammonium acetate.

- CH $\alpha$  Pyridine

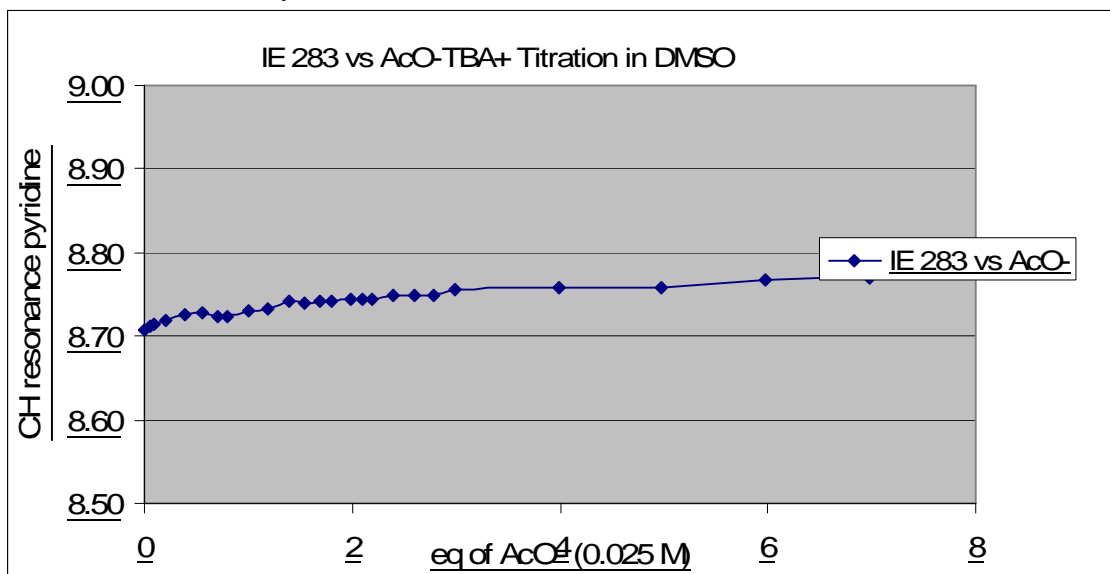

Graph 32 NMR titration shift graph.

- CH $\beta$  Pyridine

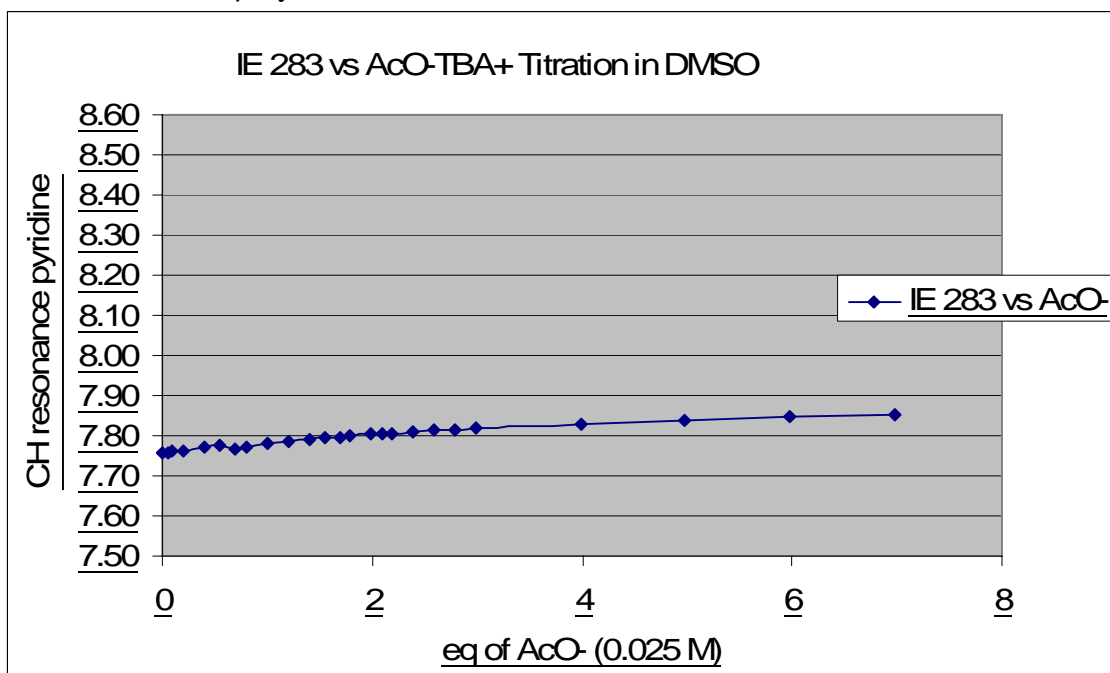

Graph 33 NMR titration shift graph.

➤ NH Pyrrole

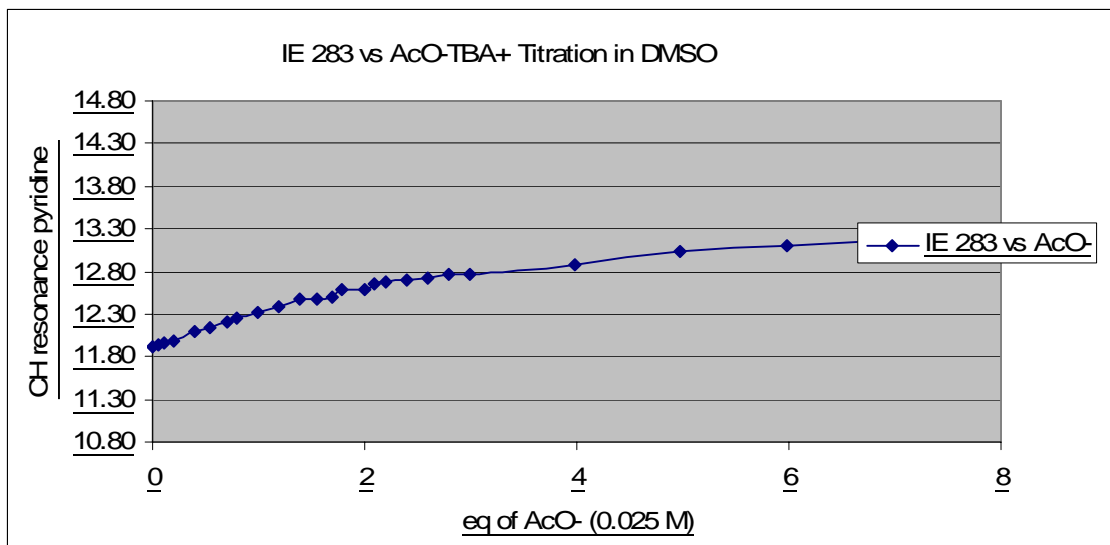

Graph 34 NMR titration shift graph.

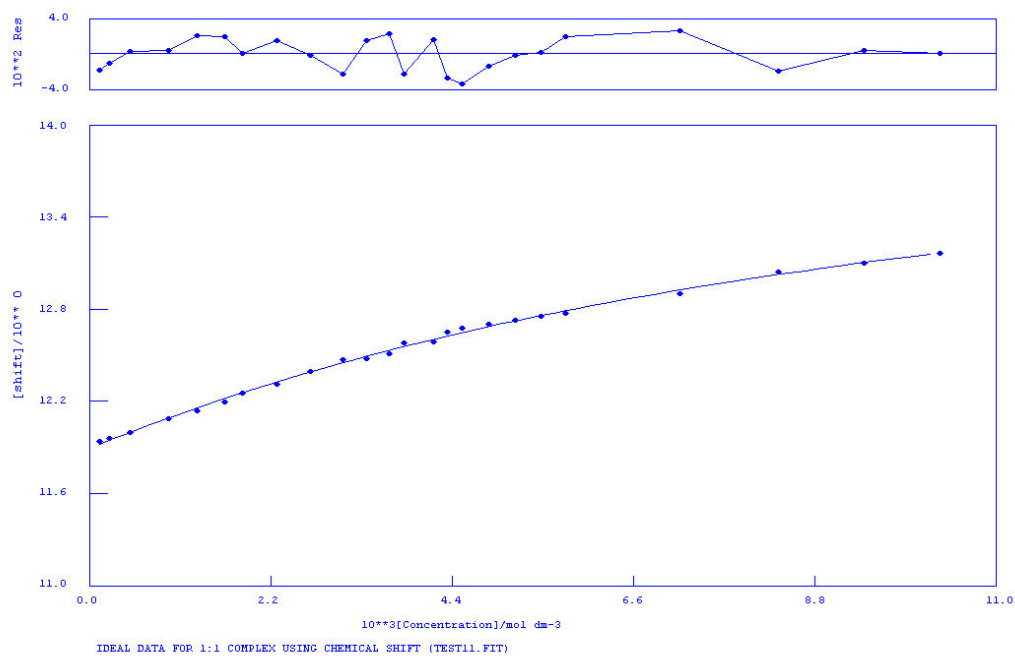

Fit 29 WinNMR fit.

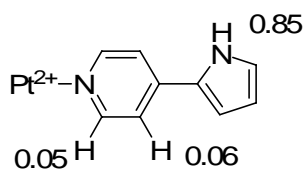

Figure 23 Shift at 3 eq.

- Tetrabutylammonium benzoate.

➤ CH $\alpha$  Pyridine

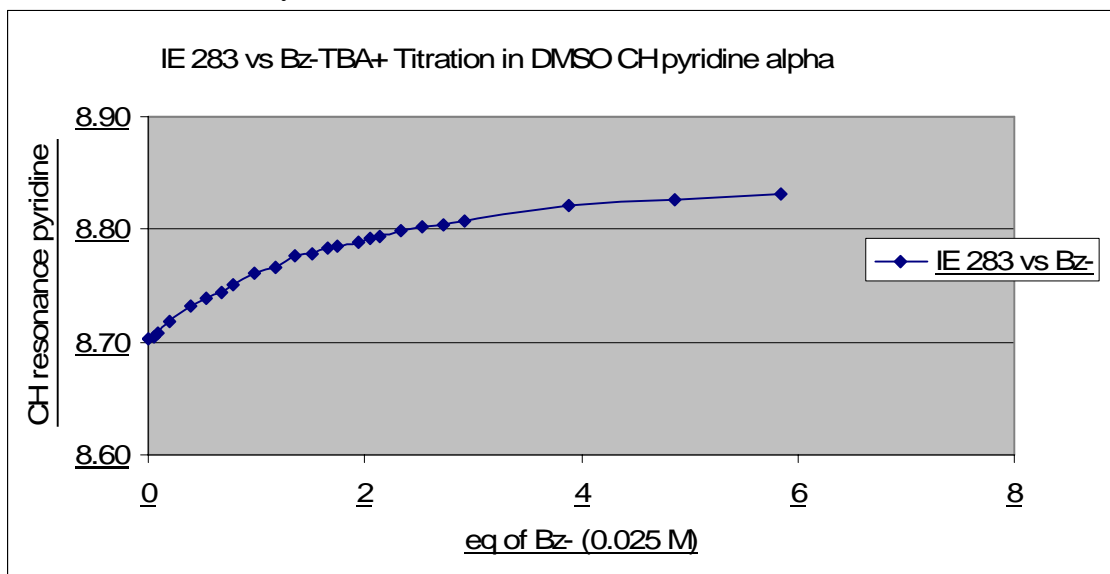

Graph 35 NMR titration shift graph.

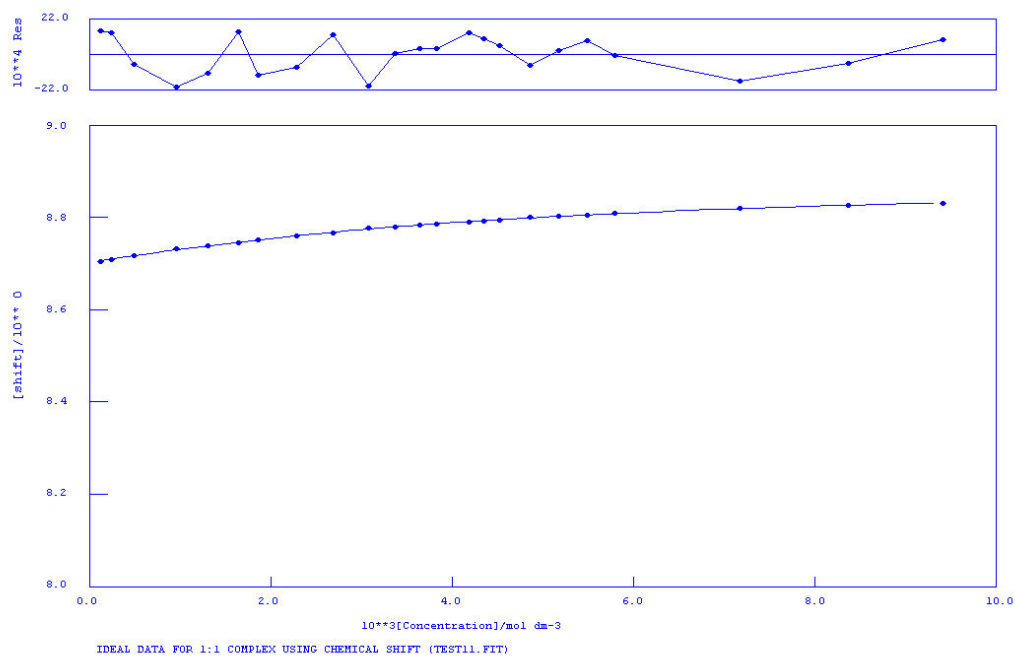

Fit 30 WinNMR fit.

➤ CH $\beta$  Pyridine

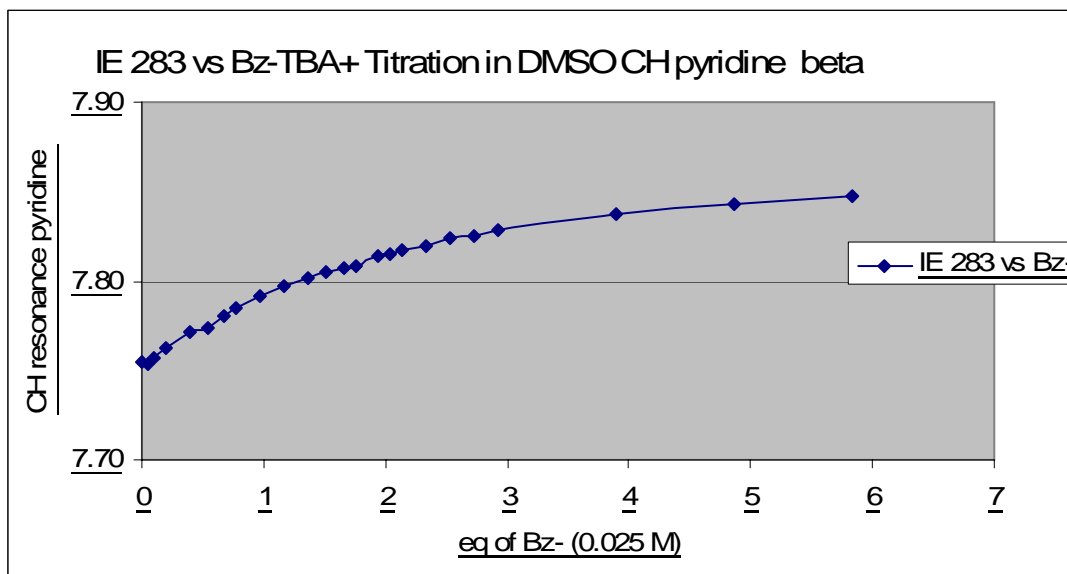

Graph 36 NMR titration shift graph.

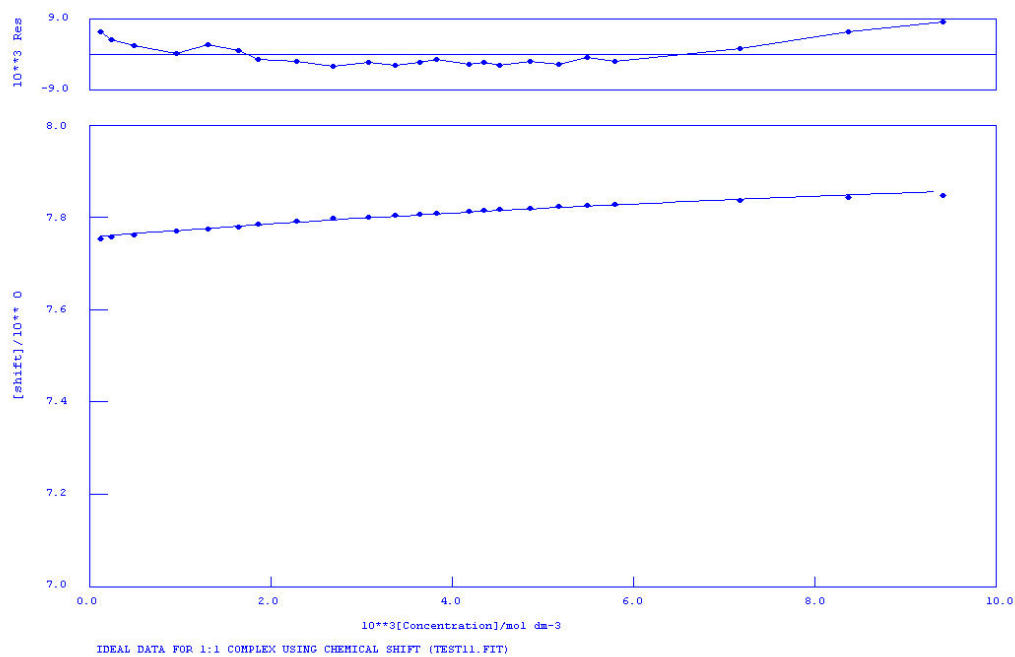

Fit 31 WinNMR fit.

➤ NH pyrrole

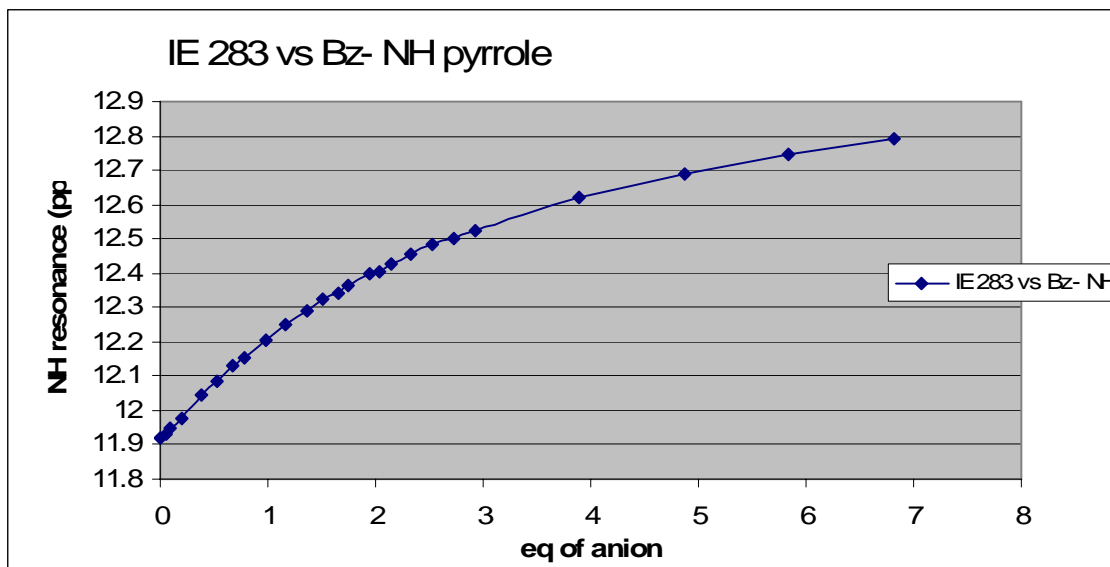

Graph 37 NMR titration shift graph.

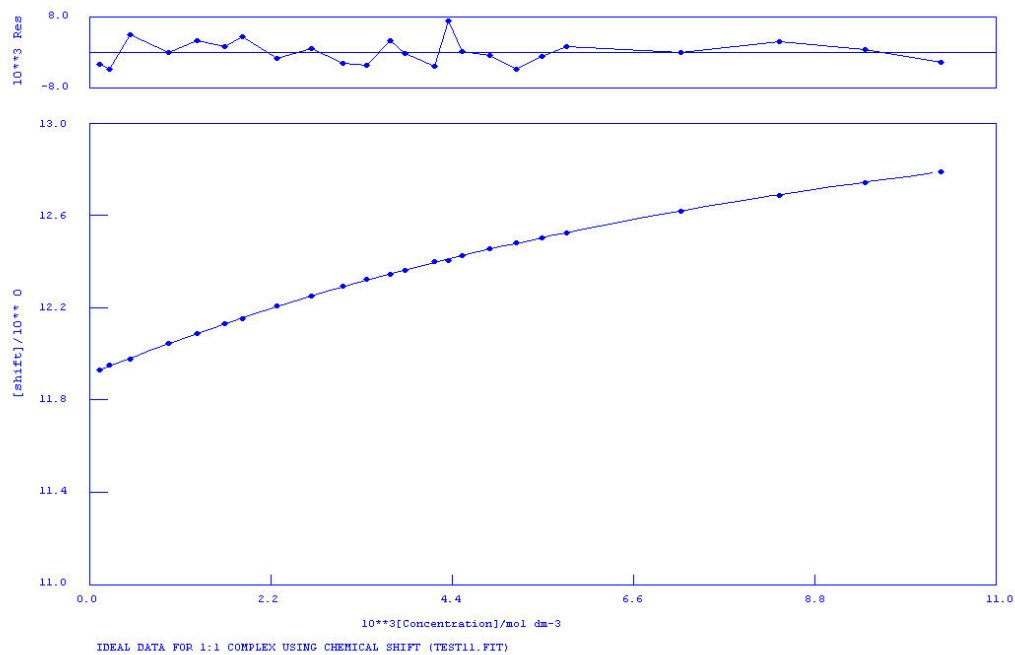

Fit 32 WinNMR fit.

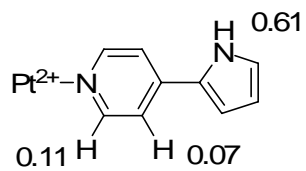

Figure 24 Shift at 3 eq.

Titration tetrakis(m-(1H-pyrrole)pyridine)platinum(II) tetrafluoroborate **2** in other solvents.

### *MeNO<sub>2</sub>-d<sub>3</sub>*.

- **Tetrabutylammonium methanesulfonate.**

➤ NH Pyrrole

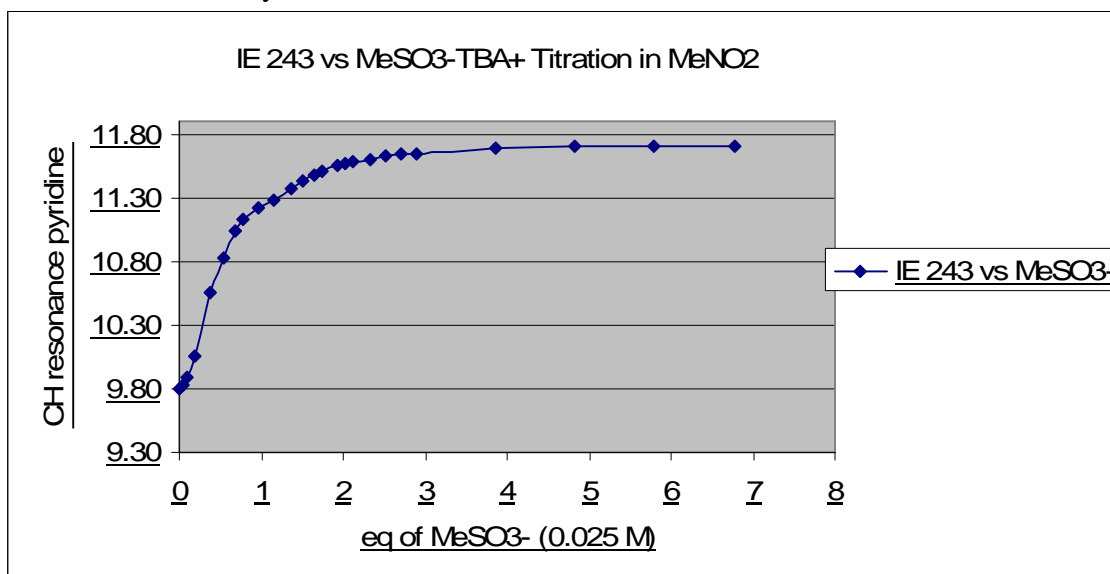

Graph 38 NMR titration shift graph.

➤ CH Pyrrole

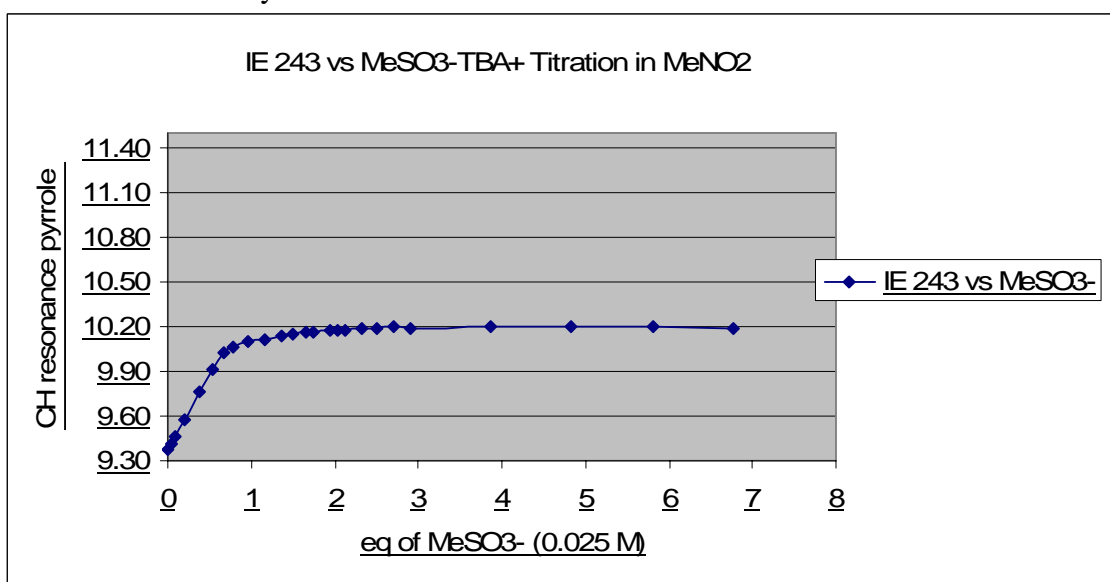

Graph 39 NMR titration shift graph.

## MeCN-d<sub>3</sub>.

- **Tetrabutylammonium methanesulfonate.**

- NH Pyrrole

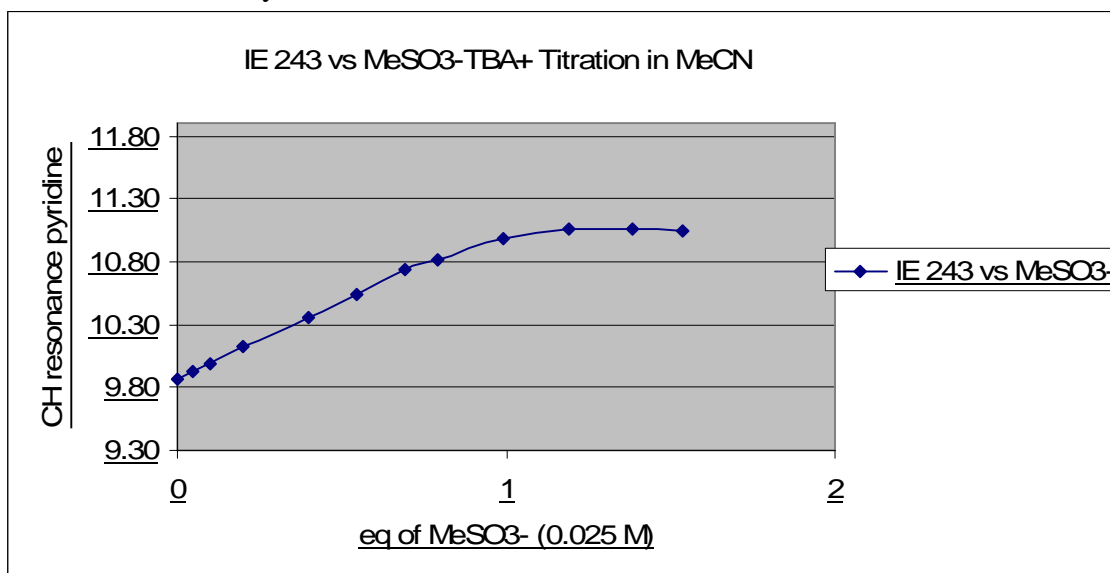

Graph 40 NMR titration shift graph.

- CH Pyridine

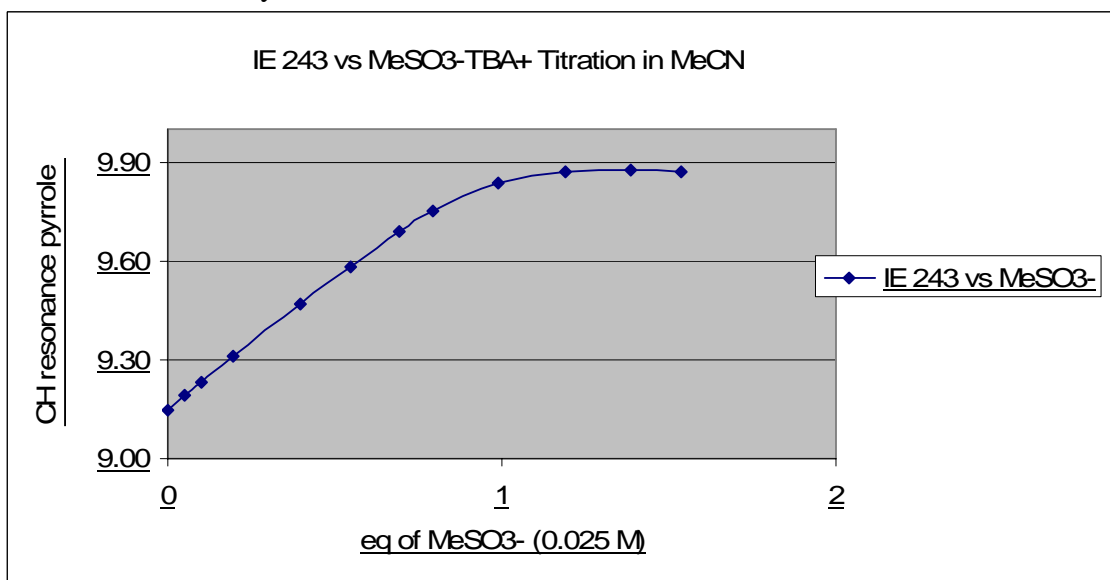

Graph 41 NMR titration shift graph.



## Ligands synthesis

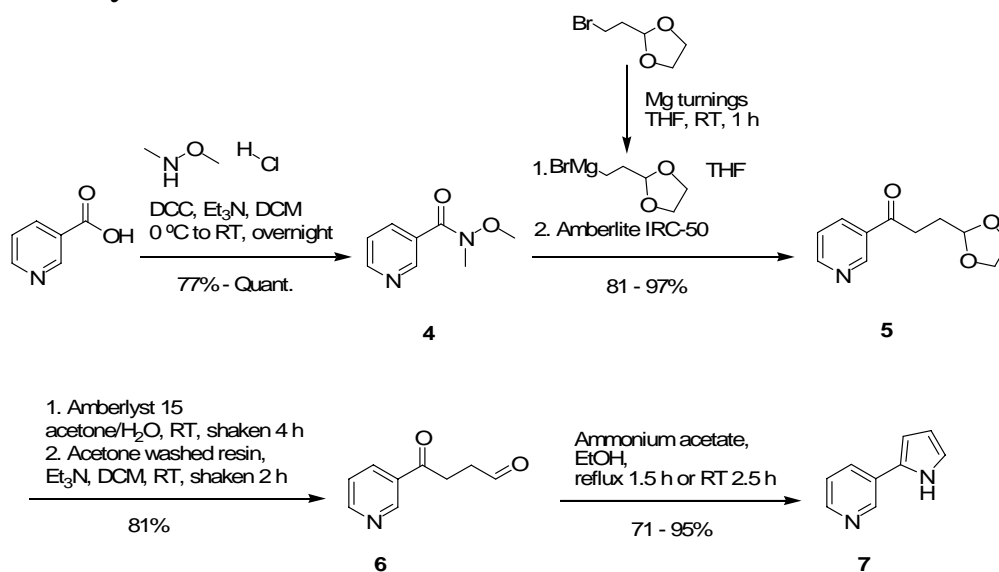

**Scheme 1** Compounds **4**, **5** and **6** prepared from the same bibliographic source<sup>a1</sup>. Final compound **7** prepared using the Paal Knorr reaction<sup>b2,3</sup>.

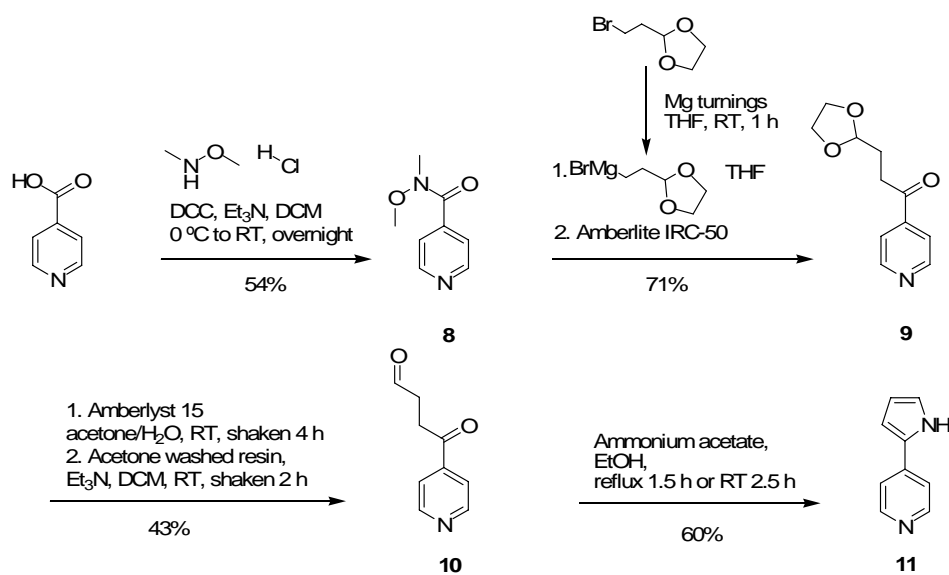

**Scheme 2** Compounds **8**, **9** and **10** prepared from the same bibliographic source<sup>1</sup>. Final compound **11** prepared using the Paal Knorr reaction<sup>2,3</sup>.

<sup>a</sup> 1. Baxendale, I. R.; Brusotti, G.; Matsuoka, M.; Ley, S. V., Synthesis of nornicotine, nicotine and other functionalised derivatives using solid-supported reagents and scavengers. *Journal of the Chemical Society-Perkin Transactions 1* **2002**, (2), 143-154.

<sup>b</sup> 2. Kruse, C. G.; Bouw, J. P.; Vanhes, R.; Vandekuilen, A.; Denhartog, J. A. J., New Methods for the Synthesis of 2-Arylpyrroles. *Heterocycles* **1987**, 26, (12), 3141-3151.

3. Noland, W. E.; Cole, K. P.; Britton, D., Five (1H-pyrrol-2-yl)pyridines. *Acta Crystallographica Section C-Crystal Structure Communications* **2003**, 59, O263-O267.

***N*-methoxy-*N*-methylnicotinamide 4.** This compound was prepared following the literature method<sup>1</sup>. Yield, 8.5 g, or 54%. <sup>1</sup>H NMR 300 MHz in CDCl<sub>3</sub> (ppm): 8.83 (dd, *J* 2.3, *J* 0.8, 1H), 8.56 (dd, *J* 4.9, *J* 1.9, 1H), 7.90 (dd, *J* 7.9, *J* 2.3, 1H), 7.24 (ddd, *J* 7.9, *J* 4.9, *J* 0.8, 1H), 1.30 (s, 3H), 1.30 (s, 3H). <sup>13</sup>C NMR 75.4 MHz in CDCl<sub>3</sub> (ppm): 166.6 (CO), 150.6 (CH), 148.5 (CH), 135.3 (CH), 129.1 (C), 122.6 (CH), 60.5 (CH<sub>3</sub>), 32.4 (CH<sub>3</sub>).

**3-(1,3-dioxolan-2-yl)-1-(pyridin-3-yl)propan-1-one 5.** This compound was prepared following the literature method<sup>1</sup>. Yield 2.7 g of yellow oil, or 74%. <sup>1</sup>H NMR 300 MHz in CDCl<sub>3</sub> (ppm): 9.12 (dd, *J* 1.5, *J* 0.8, 1H), 8.71 (dd, *J* 4.9, *J* 1.9, 1H), 8.18 (ddd, *J* 7.9, *J* 1.9, *J* 1.5, 1H), 7.36 (ddd, *J* 7.9, *J* 4.9, *J* 0.8, 1H), 4.95 (t, *J* 4.1, 1H), 3.90 (m, 2H), 3.80 (m, 2H), 3.07 (t, *J* 7.1, 2H), 2.15 (td, *J* 7.1, *J* 4.1, 2H). <sup>13</sup>C NMR 75.4 MHz in CDCl<sub>3</sub> (ppm): 198.2 (CO), 153.4 (CH), 149.6 (CH), 135.4 (CH), 132.2 (C), 123.6 (CH), 103.1 (CH), 65.0 (2 × CH<sub>2</sub>), 32.7 (CH<sub>2</sub>), 27.7 (CH<sub>2</sub>).

**4-oxo-4-(pyridin-3-yl)butanal 6.** This compound was prepared following the literature method<sup>1</sup>. Yield 0.6 g of yellow oil, or 73%. <sup>1</sup>H NMR 300 MHz in CDCl<sub>3</sub> (ppm): 9.89 (s, 1H), 9.19 (d, *J* 0.8, 1H), 8.78 (dd, *J* 0.8, *J* 3.6, 1H), 8.24 (dd, *J* 5.5, *J* 1.3, 1H), 7.42 (dd, *J* 3.6, *J* 5.5, 1H), 3.31 (t, *J* 4.5, 2H), 2.96 (t, *J* 4.7, 2H). <sup>13</sup>C NMR 75.4 MHz in CDCl<sub>3</sub> (ppm): 200.1 (CO), 196.8 (CO), 153.8 (CH), 149.7 (CH), 135.5 (CH), 131.9 (C), 123.8 (CH), 37.5 (CH<sub>2</sub>), 31.3 (CH<sub>2</sub>).

**3-(1*H*-pyrrol-2-yl)pyridine 7.** This compound was prepared following the literature method<sup>2,3</sup>. Yield 1.2 g of white solid, or 84%. <sup>1</sup>H NMR 300 MHz in DMSO-*d*<sub>6</sub> (ppm): 11.43 (s, 1H), 8.87 (d, *J* 2.3, 1H), 8.33 (dd, *J* 1.5, *J* 4.9, 1H), 7.96 (ddd, *J* 7.9, *J* 1.5, *J* 2.25, 1H), 7.35 (dd, *J* 7.9, *J* 4.9, 1H), 6.92 (s, 1H), 6.63 (s, 1H), 6.15 (dd, *J* 3.4, *J* 6.0, 1H). <sup>13</sup>C NMR 75.4 MHz in DMSO-*d*<sub>6</sub> (ppm): 146.5 (CH), 144.9 (CH), 131.6 (CH), 129.3 (C), 128.6 (C), 124.0 (CH), 120.5 (CH), 110.6 (CH), 107.6 (CH).

***N*-methoxy-*N*-methylisonicotinamide 8.** This compound was prepared following the literature method<sup>1</sup>. Yield 8.53 g of yellow oil, or 55%. <sup>1</sup>H NMR 300 MHz in CDCl<sub>3</sub> (ppm): 8.64 (dd, *J* 4.5, *J* 1.5, 2H), 7.45 (dd, *J* 4.5, *J* 1.5, 2H), 3.48 (s, 3H), 3.31 (s, 3H). <sup>13</sup>C NMR 75.4 MHz in CDCl<sub>3</sub> (ppm): 167.5 (CO), 1149.9 (CH), 141.7 (C), 121.9 (CH), 61.3 (2 × CH<sub>3</sub>).

**3-(1,3-dioxolan-2-yl)-1-(pyridin-4-yl)propan-1-one 9.** This compound was prepared following the literature method<sup>1</sup>. Yield 4.1 g of yellow oil, or 54%. <sup>1</sup>H NMR 300 MHz in CDCl<sub>3</sub> (ppm): 8.76 (dd, *J* 3.1, *J* 1.5, 2H), 7.70 (dd, *J* 3.1, *J* 1.5, 2H), 4.96 (t, *J* 3.4, 1H), 3.91 (m, 2H), 3.82 (m, 2H), 3.07 (t, *J* 5.3, 2H), 2.12 (m, 2H). <sup>13</sup>C NMR 75.4 MHz in CDCl<sub>3</sub> (ppm): 198.9 (CO), 150.9 (CH), 142.9 (C), 121.1 (CH), 103.1 (CH), 65.1 (CH<sub>2</sub>), 32.7 (CH<sub>2</sub>), 27.7 (CH<sub>2</sub>).

**4-oxo-4-(pyridin-4-yl)butanal 10.** This compound was prepared following the literature method<sup>1</sup>. Yield 1.32 g of yellow oil, or 42%. <sup>1</sup>H NMR 300 MHz in CDCl<sub>3</sub> (ppm): 9.84 (s, 1H), 8.78 (d, *J* 4.5, 2H), 7.72 (dd, *J* 3.4, *J* 1.1, 2H), 3.26 (t, *J* 4.5, 2H), 2.93 (t, *J* 4.9, 2H). <sup>13</sup>C NMR 75.4 MHz in CDCl<sub>3</sub> (ppm): 206.8 (CO), 199.9 (CO), 150.9 (CH), 142.4 (C), 121.1 (CH), 37.4 (CH<sub>2</sub>), 31.3 (CH<sub>2</sub>).

**4-(1*H*-pyrrol-2-yl)pyridine 11.** This compound was prepared following the literature method<sup>2,3</sup>. Yield 0.67 g of white solid, or 56%. <sup>1</sup>H NMR 300 MHz in DMSO-*d*<sub>6</sub> (ppm): 11.59 (s, 1H), 8.45 (d, *J* 4.5, 2H), 7.56 (d, *J* 4.5, 2H), 6.98 (s, 1H), 6.79 (s, 1H), 6.19 (s, 1H). <sup>13</sup>C NMR 75.4 MHz in DMSO-*d*<sub>6</sub> (ppm): 149.9 (CH), 139.3 (C), 128.3 (C), 121.6 (CH), 117.3 (CH), 109.7 (CH), 108.7 (CH).

## Stack plots

### *Methanesulfonate in DMSO-d<sub>6</sub>.*

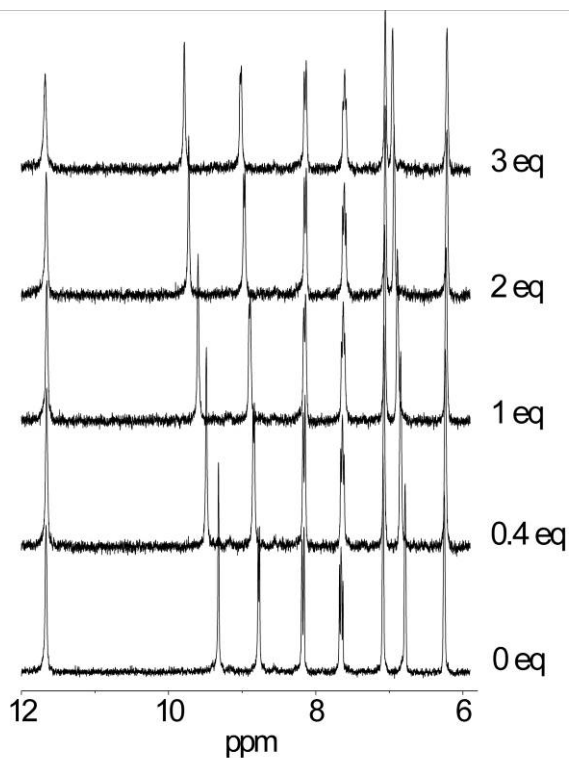

**Figure 25** Stack plot tetrakis *m*-(1*H*-pyrrol-2-yl)pyridine)platinum(II) tetrafluoroborate **2** with tetrabutylammonium methanesulfonate in DMSO-*d*<sub>6</sub>.

### *Iodide in DMSO-d<sub>6</sub>.*

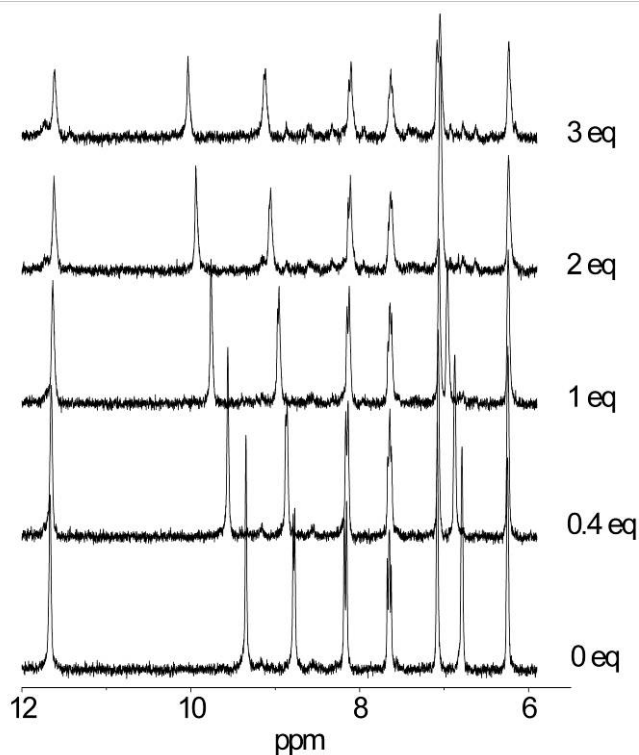

**Figure 26** Stack plot tetrakis *m*-(1*H*-pyrrol-2-yl)pyridine)platinum(II) tetrafluoroborate **2** with tetrabutylammonium iodide in DMSO-*d*<sub>6</sub>.

### Bromide in DMSO- $d_6$ .

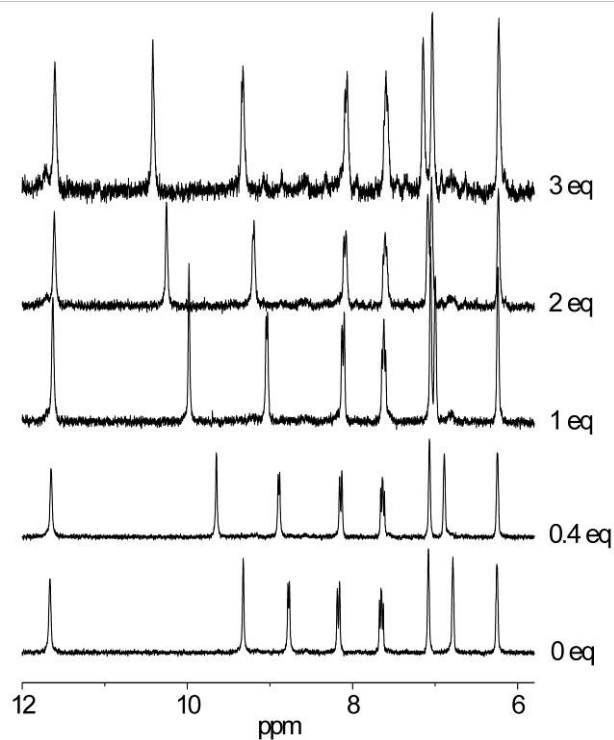

**Figure 27** Stack plot tetrakis *m*-(1*H*-pyrrol-2-yl)pyridine)platinum(II) tetrafluoroborate **2** with tetrabutylammonium bromide in  $\text{DMSO-}d_6$ .

### Chloride in DMSO- $d_6$ .

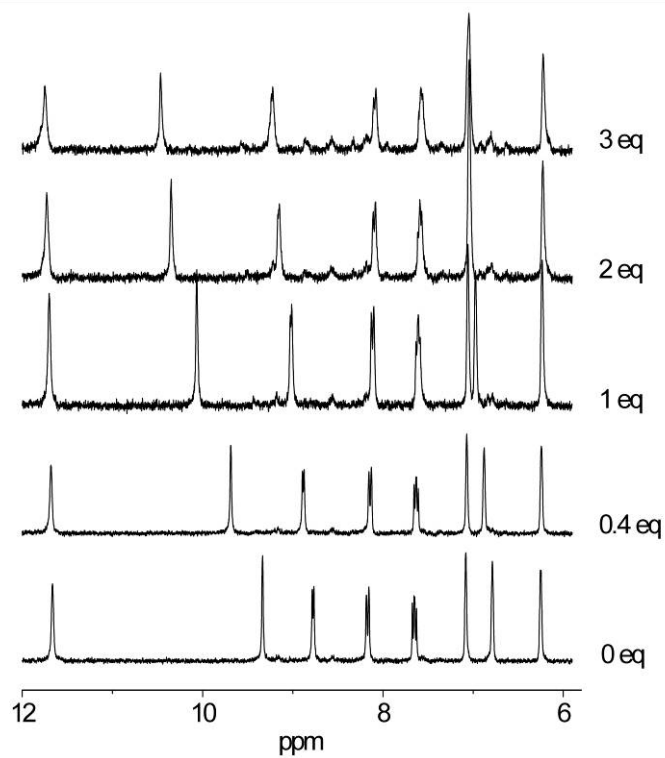

**Figure 28** Stack plot tetrakis *m*-(1*H*-pyrrol-2-yl)pyridine)platinum(II) tetrafluoroborate **2** with tetrabutylammonium chloride in  $\text{DMSO-}d_6$ .

### Acetate in DMSO- $d_6$ .

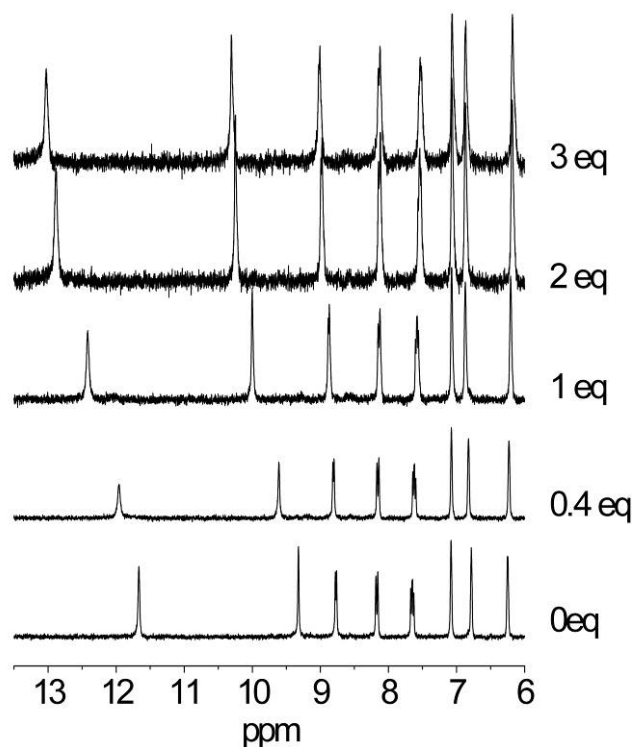

**Figure 29** Stack plot tetrakis *m*-(1*H*-pyrrol-2-yl)pyridine)platinum(II) tetrafluoroborate **2** with tetrabutylammonium acetate in DMSO- $d_6$ .

### Methanesulfonate in MeNO $_2$ - $d_3$ .

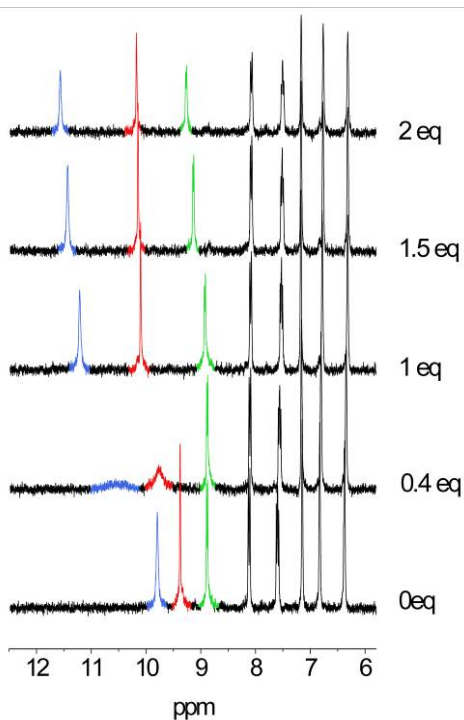

**Figure 30** Stack plot tetrakis *m*-(1*H*-pyrrol-2-yl)pyridine)platinum(II) tetrafluoroborate **2** with tetrabutylammonium methanesulfonate in MeNO $_2$ - $d_3$ . Precipitation occurred after 2 equivalents.

### ***Methanesulfonate in MeCN-d<sub>3</sub>.***

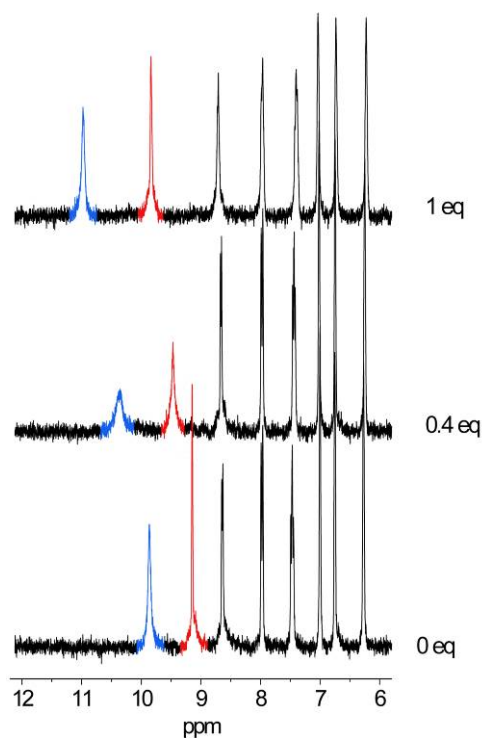

**Figure 31** Stack plot tetrakis *m*-(1*H*-pyrrol-2-yl)pyridine)platinum(II) tetrafluoroborate **2** with tetrabutylammonium methanesulfonate in MeCN-*d*<sub>3</sub>. Precipitation occurred after 1 equivalent.

### ***Chloride in MeNO<sub>2</sub>-d<sub>3</sub>.***

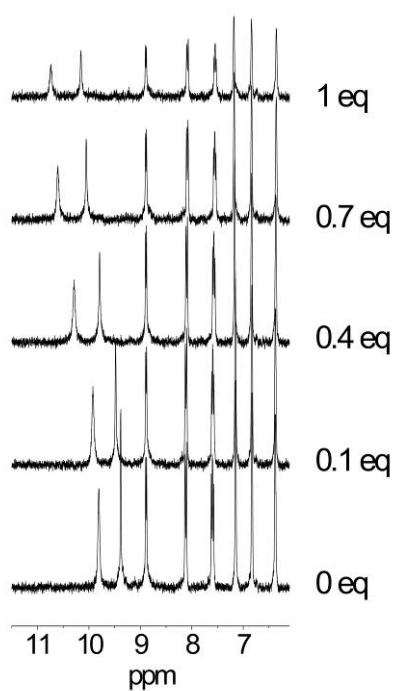

**Figure 32** Stack plot tetrakis *m*-(1*H*-pyrrol-2-yl)pyridine)platinum(II) tetrafluoroborate **2** with tetrabutylammonium chloride in MeNO<sub>2</sub>-*d*<sub>3</sub>. Precipitation occurred after 1 equivalent.

### Bromide in $\text{MeNO}_2\text{-}d_3$ .

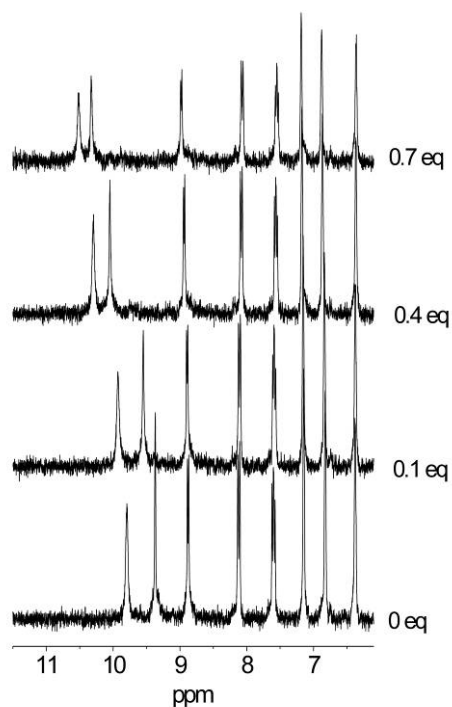

**Figure 33** Stack plot tetrakis *m*-(1*H*-pyrrol-2-yl)pyridine)platinum(II) tetrafluoroborate **2** with tetrabutylammonium bromide in  $\text{MeNO}_2\text{-}d_3$ . Precipitation occurred after 1 equivalent.

### Iodide in $\text{MeNO}_2\text{-}d_3$ .

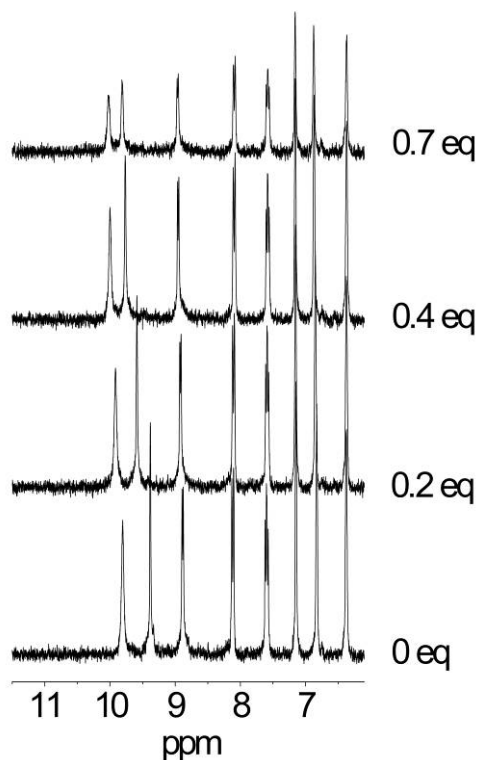

**Figure 34** Stack plot tetrakis *m*-(1*H*-pyrrol-2-yl)pyridine)platinum(II) tetrafluoroborate **2** with tetrabutylammonium iodide in  $\text{MeNO}_2\text{-}d_3$ . Precipitation occurred after 1 equivalent.

### Hydrogensulfate in MeNO<sub>2</sub>-d<sub>3</sub>.

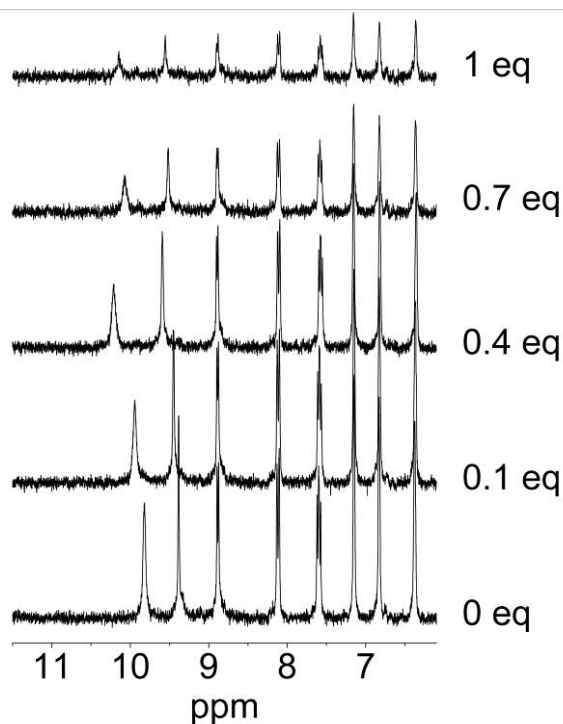

**Figure 35** Stack plot tetrakis *m*-(1*H*-pyrrol-2-yl)pyridine)platinum(II) tetrafluoroborate **2** with tetrabutylammonium hydrogensulfate in MeNO<sub>2</sub>-d<sub>3</sub>. Precipitation occurred after 1 equivalent.

### Nitrate in MeNO<sub>2</sub>-d<sub>3</sub>.

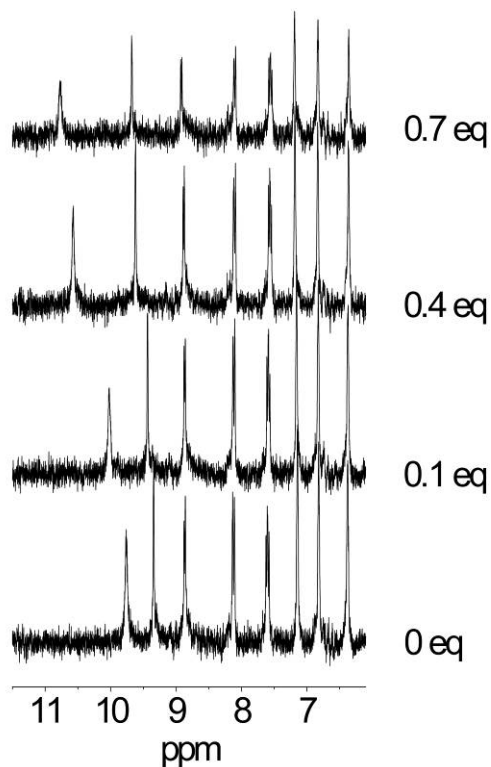

**Figure 36** Stack plot tetrakis *m*-(1*H*-pyrrol-2-yl)pyridine)platinum(II) tetrafluoroborate with tetrabutylammonium nitrate in MeNO<sub>2</sub>-d<sub>3</sub>. Precipitation occurred after 1 equivalent.



## Shifts overview

**Table 1** Abstract of  $^1\text{H}$  NMR shifts for compounds 1-3.

|                   | 1                                                                                               | 2                                                                                                                  | 3                                                                                                             |
|-------------------|-------------------------------------------------------------------------------------------------|--------------------------------------------------------------------------------------------------------------------|---------------------------------------------------------------------------------------------------------------|
| $\text{Cl}^-$     | 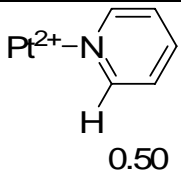 <p>0.50</p>   |  <p>1.15<br/>0.27<br/>0.09</p>  |  <p>0.34<br/>0<br/>0</p>   |
| $\text{Br}^-$     |  <p>0.34</p>   |  <p>0.99<br/>0.33<br/>-0.06</p> |  <p>0.32<br/>0<br/>0</p>   |
| $\text{I}^-$      |  <p>0.16</p>   |  <p>0.69<br/>0.29<br/>-0.06</p> |  <p>0.22<br/>0<br/>0</p>   |
| $\text{HSO}_4^-$  |  <p>0.08</p>  |  <p>0.42<br/>0.17<br/>0</p>    |  <p>0.07<br/>0<br/>0</p>  |
| $\text{MeSO}_3^-$ |  <p>0.08</p> |  <p>0.46<br/>0.17<br/>0</p>   |  <p>0.02<br/>0<br/>0</p> |

|                                              |                                                                                   |                                                                                     |                                                                                     |
|----------------------------------------------|-----------------------------------------------------------------------------------|-------------------------------------------------------------------------------------|-------------------------------------------------------------------------------------|
| Bz <sup>-</sup>                              | 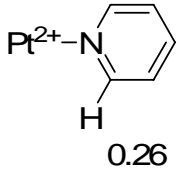 |  |  |
| AcO <sup>-</sup>                             |  |  |  |
| NO <sub>3</sub> <sup>-</sup>                 | -                                                                                 |  |  |
| CF <sub>3</sub> SO <sub>3</sub> <sup>-</sup> | -                                                                                 |  | -                                                                                   |

# CH correlation experiments.

## HMBQC of compound 2.

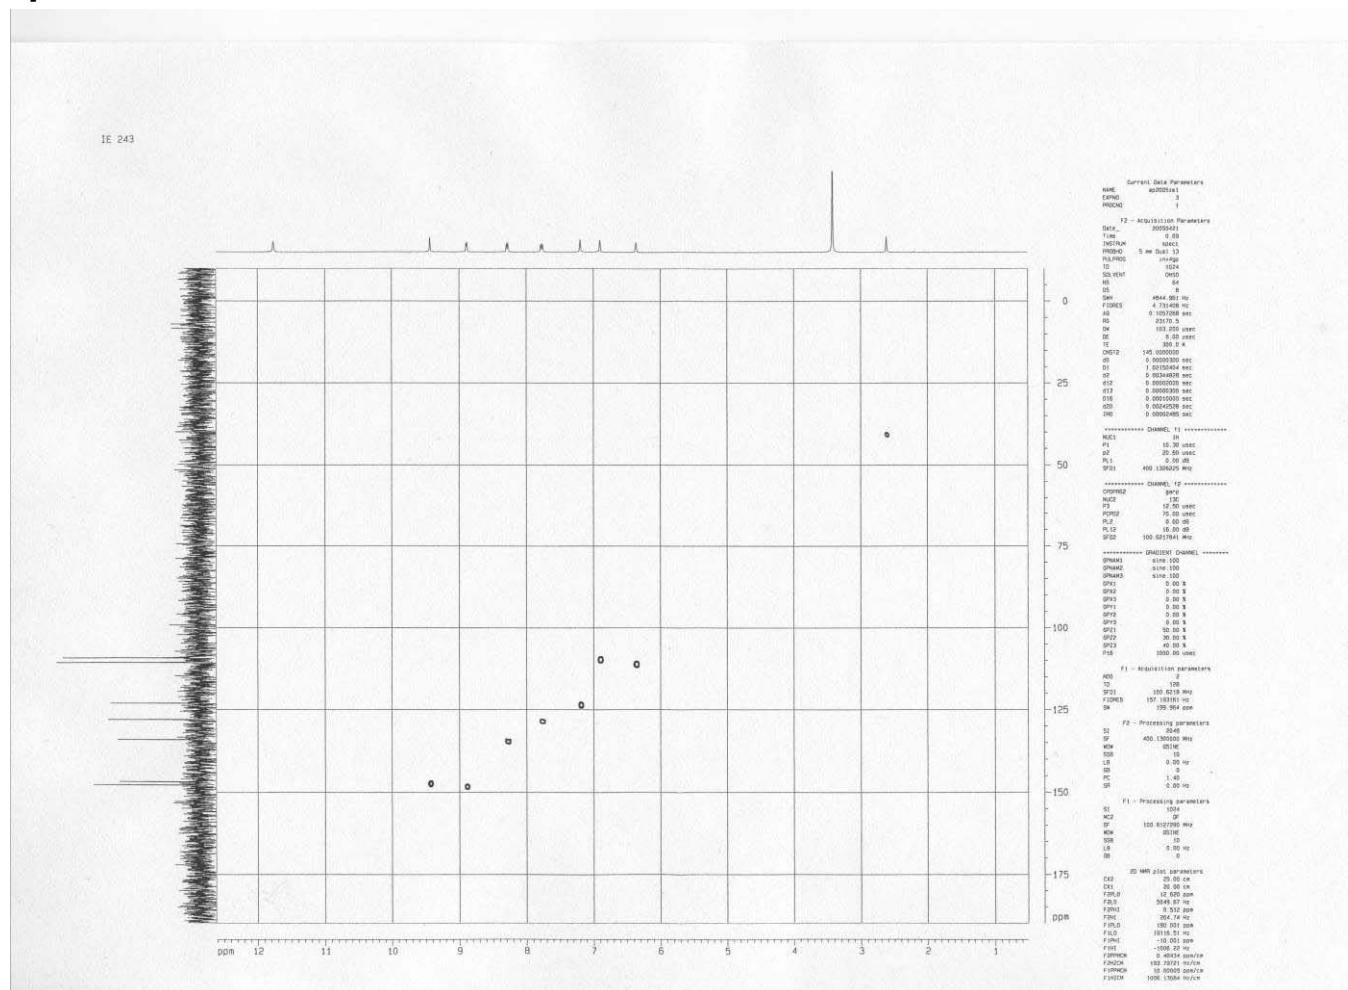

Figure 37 Compound 2 CH correlation.



# Spectroscopic data.

## Compound 1

### $^1\text{H}$ NMR

tetrakispyridineplatinum(II) tetrafluoroborate 1

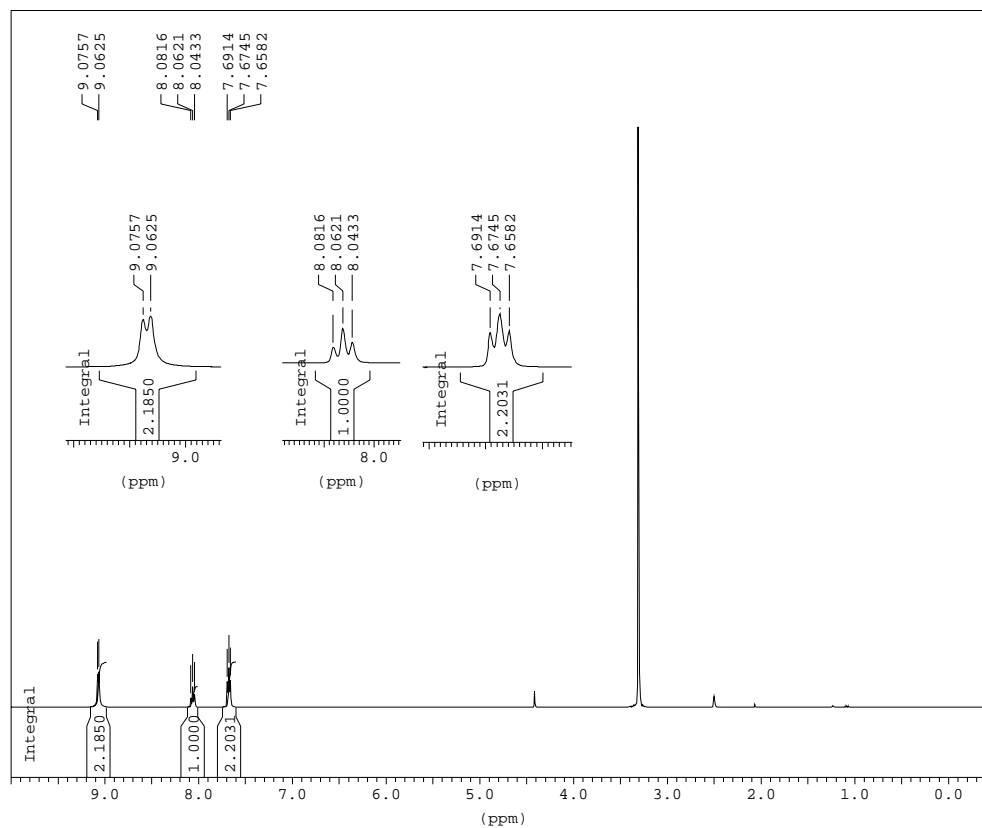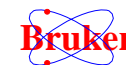

\*\*\* Current Data Parameters \*\*\*

NAME : ap2105ie1  
EXPNO : 2  
PROCNO : 1  
NUC1 : 1H  
SF : 400.1300000 MHz

Figure 39  $^1\text{H}$  NMR spectra of compound 1.

# $^{13}\text{C}$ NMR

tetrakispyridineplatinum(II) tetrafluoroborate 1.

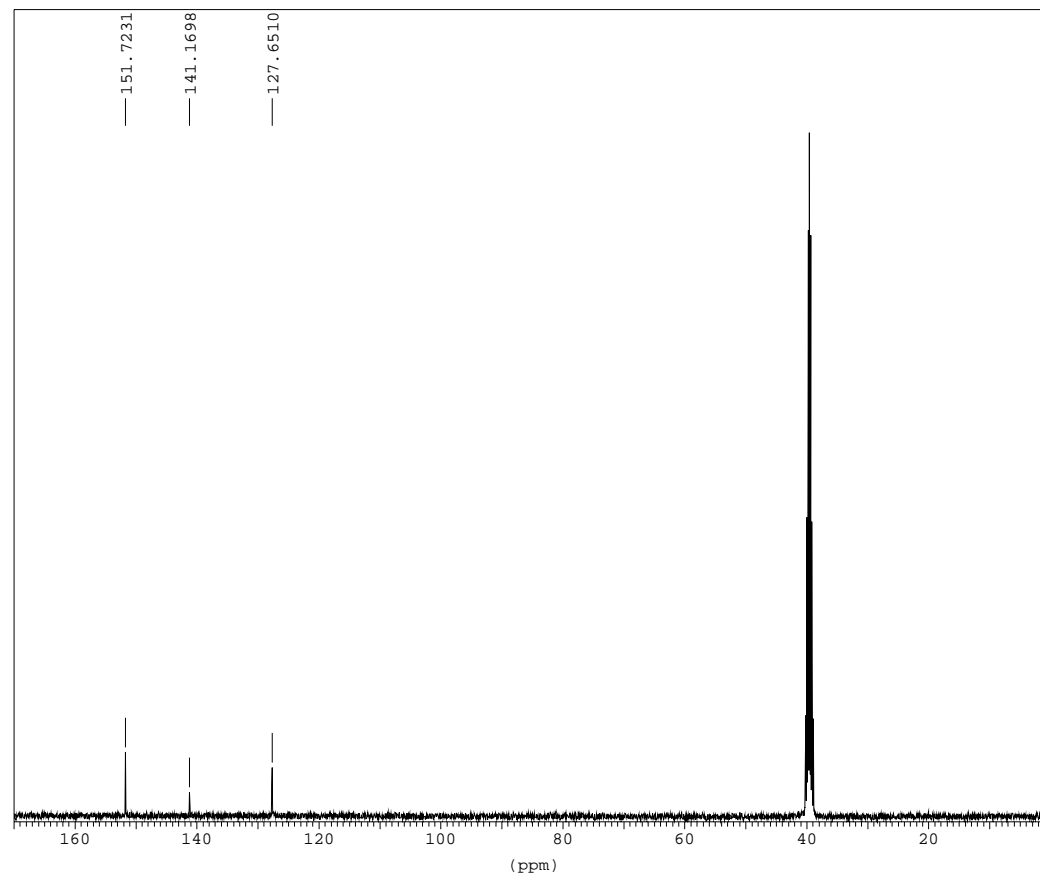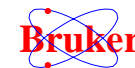

\*\*\* Current Data Parameters \*\*\*

NAME : ap2105ie1  
EXPNO : 3  
PROCNO : 1  
NUC1 :  $^{13}\text{C}$   
SF : 100.6129904

Figure 40  $^{13}\text{C}$  NMR spectra of compound 1.

# HR Mass spectrum

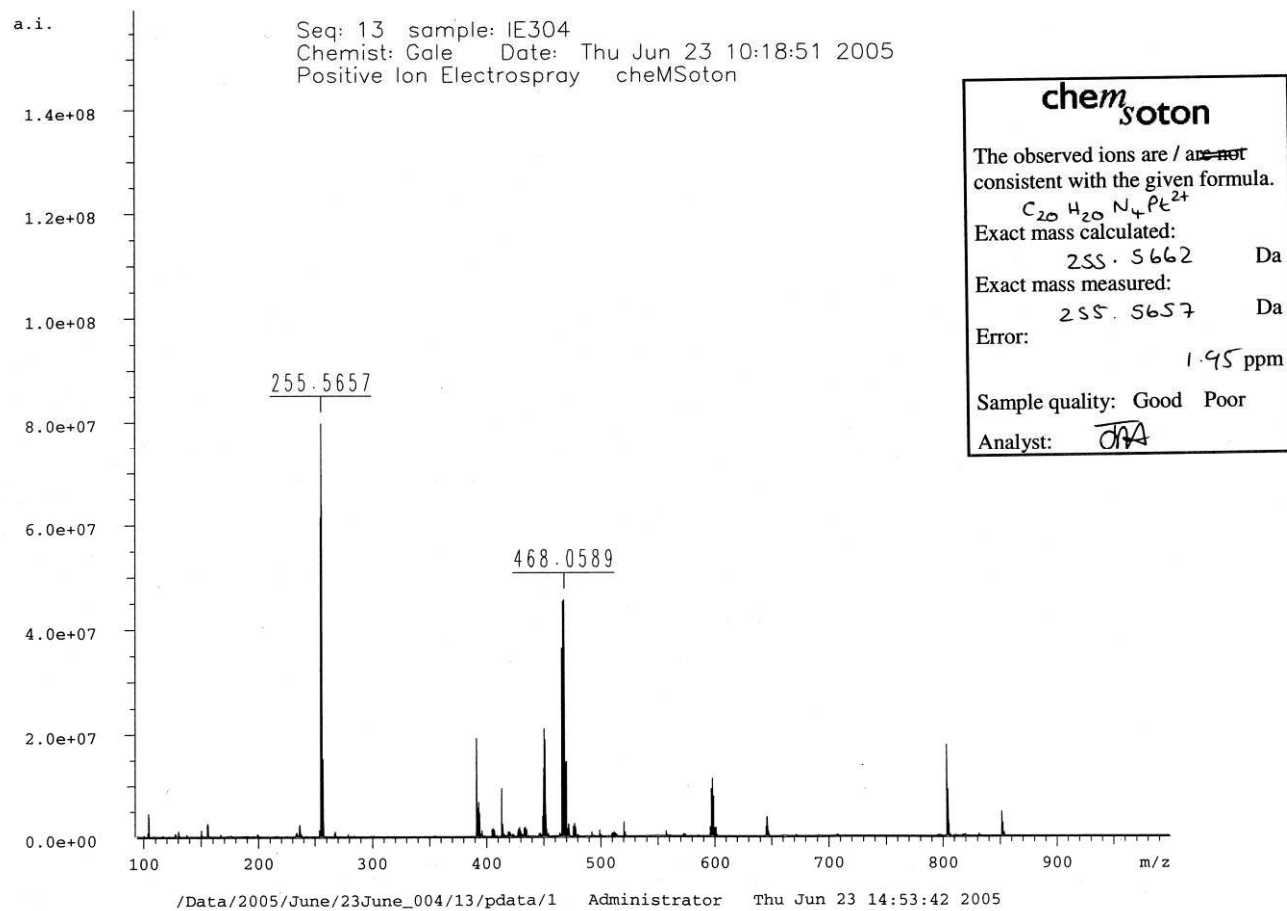

Figure 41 HRES<sup>+</sup> of compound 1.

# Compound 2

## <sup>1</sup>H NMR

tetrakis(m-(1H-pyrrole)pyridine)platinum(II) tetrafluoroborate 2.

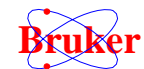

\*\*\* Current Data Parameters \*\*\*

NAME : apl805iel  
EXPNO : 1  
PROCNO : 1  
  
NUC1 : 1H  
SF : 400.1324710 MHz

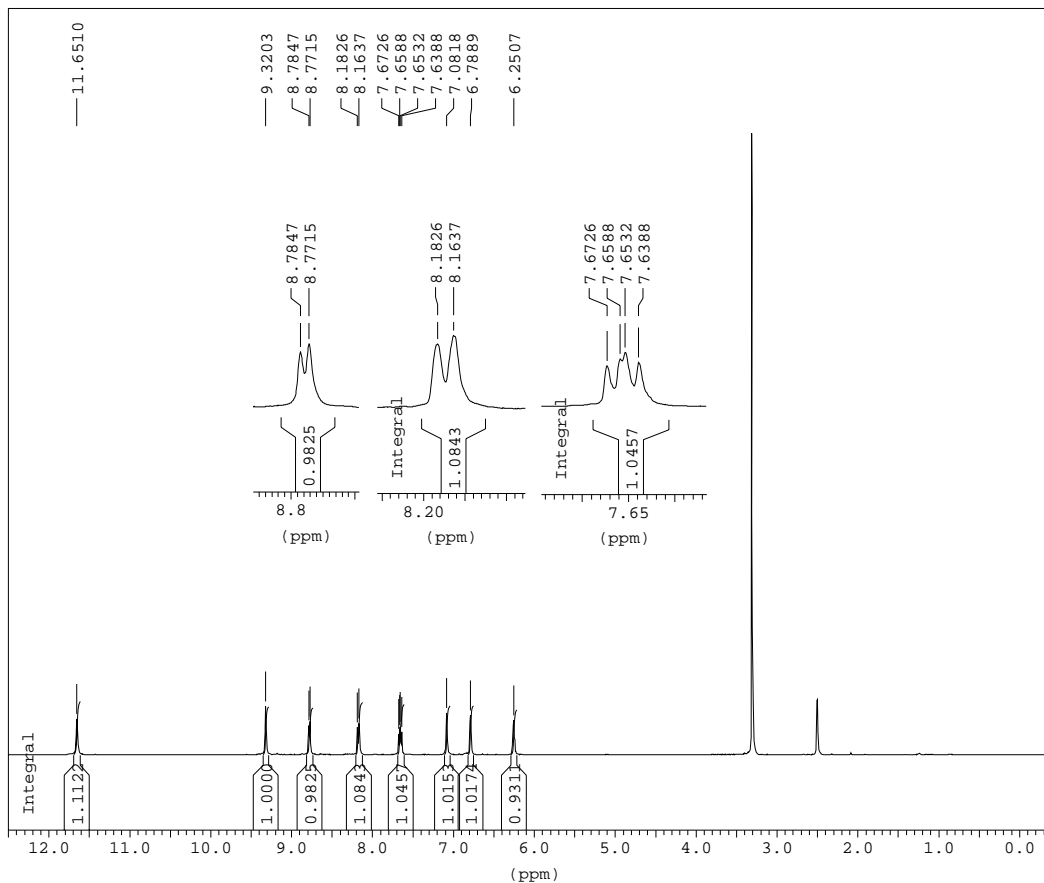

Figure 42 <sup>1</sup>H NMR spectra of compound 1.



# <sup>13</sup>C NMR

tetrakis(m-(1H-pyrrole)pyridine)platinum(II) tetrafluoroborate 2.

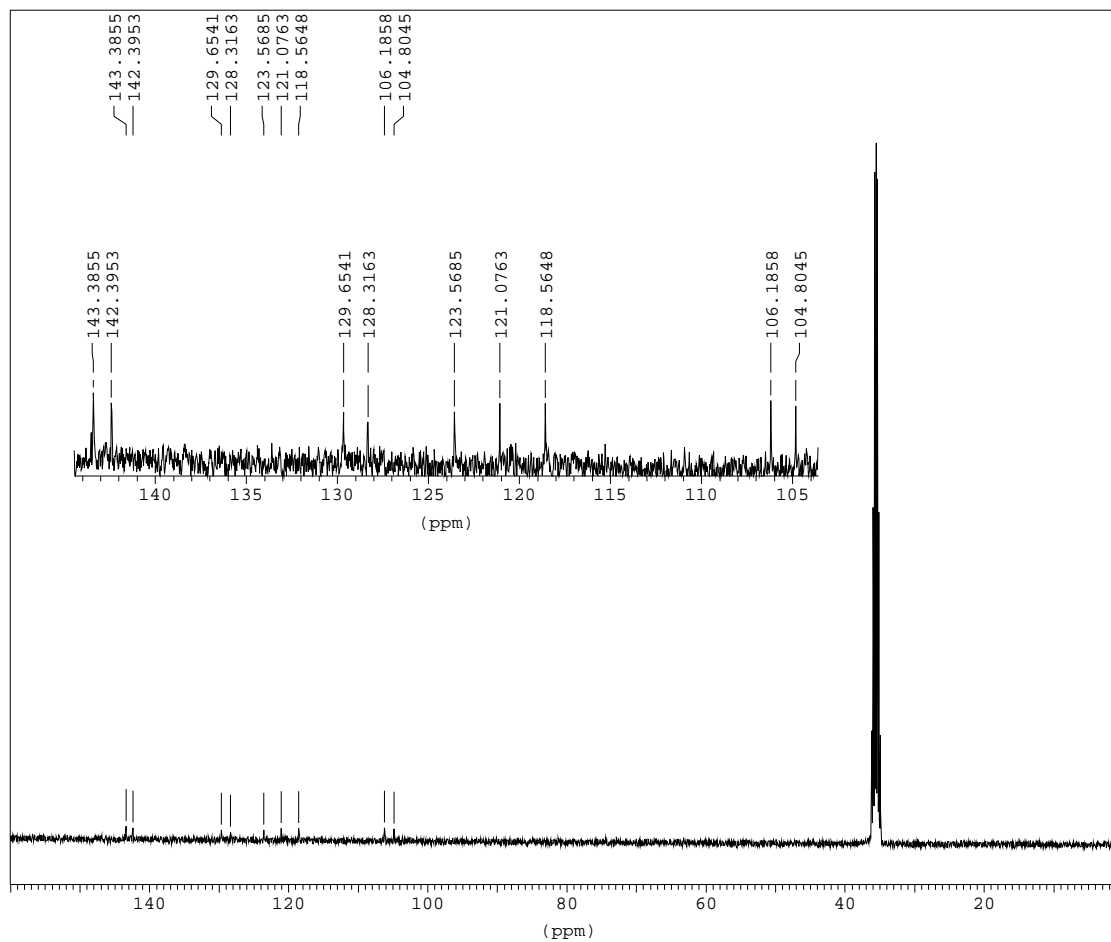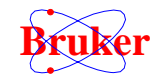

\*\*\* Current Data Parameters \*\*\*

NAME : ap1805ie1  
EXPNO : 2  
PROCNO : 1  
NUC1 : 13C  
SF : 100.6129021 MHz

Figure 43 <sup>13</sup>C NMR spectra of compound 2.

# HR Mass spectrum

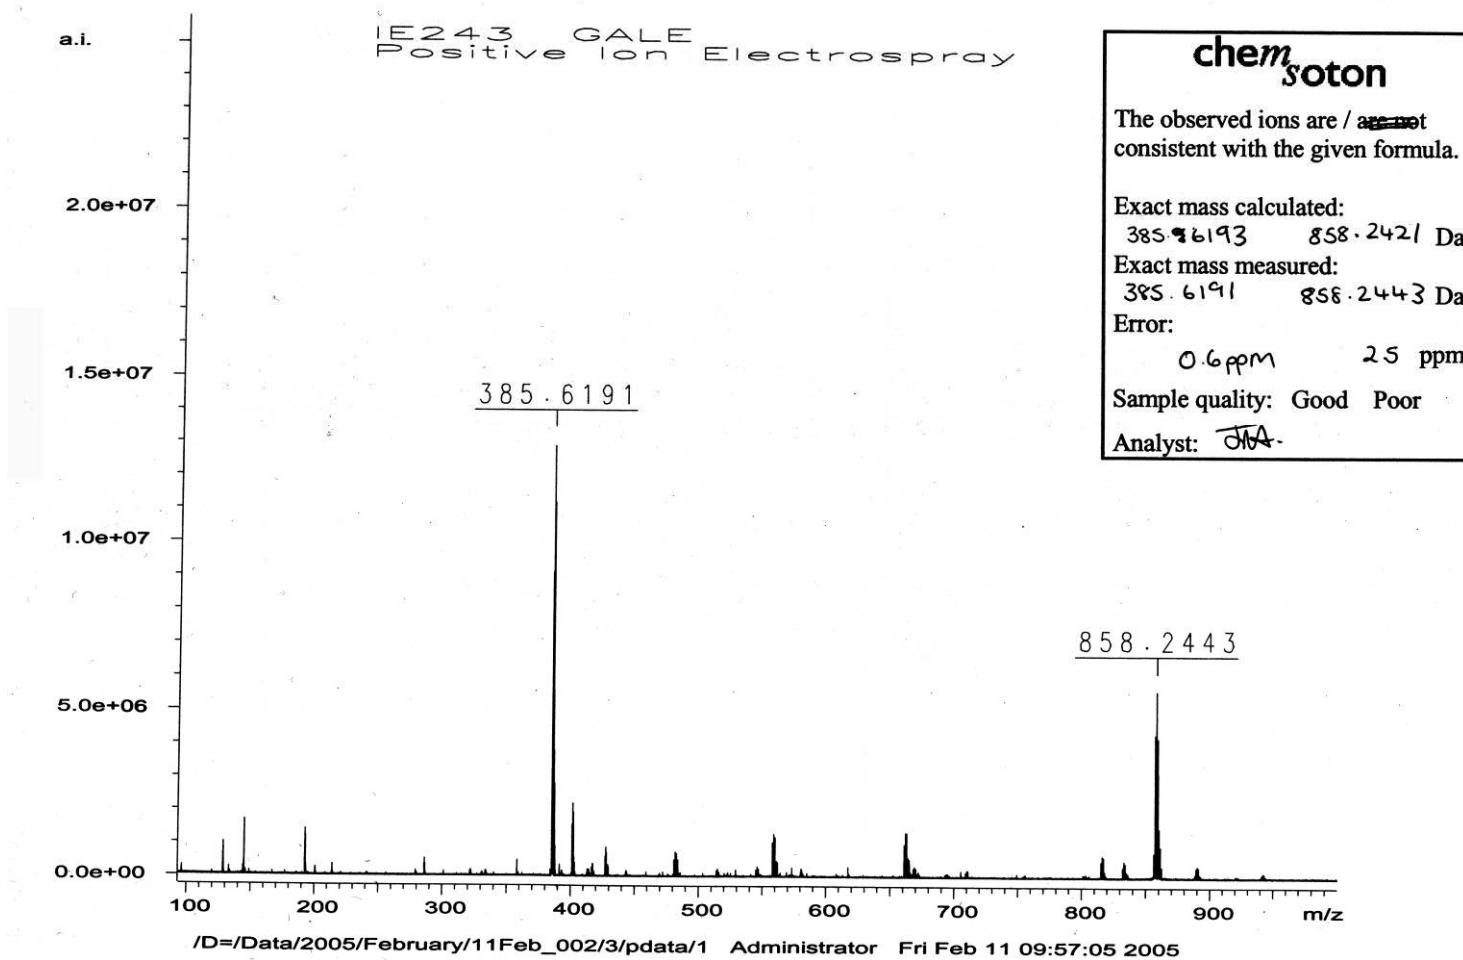

Figure 44 HRES<sup>+</sup> of compound 2.

# Compound 3

## <sup>1</sup>H NMR

tetrakis(p-(1H-pyrrole)pyridine)platinum(II) tetrafluoroborate 3.

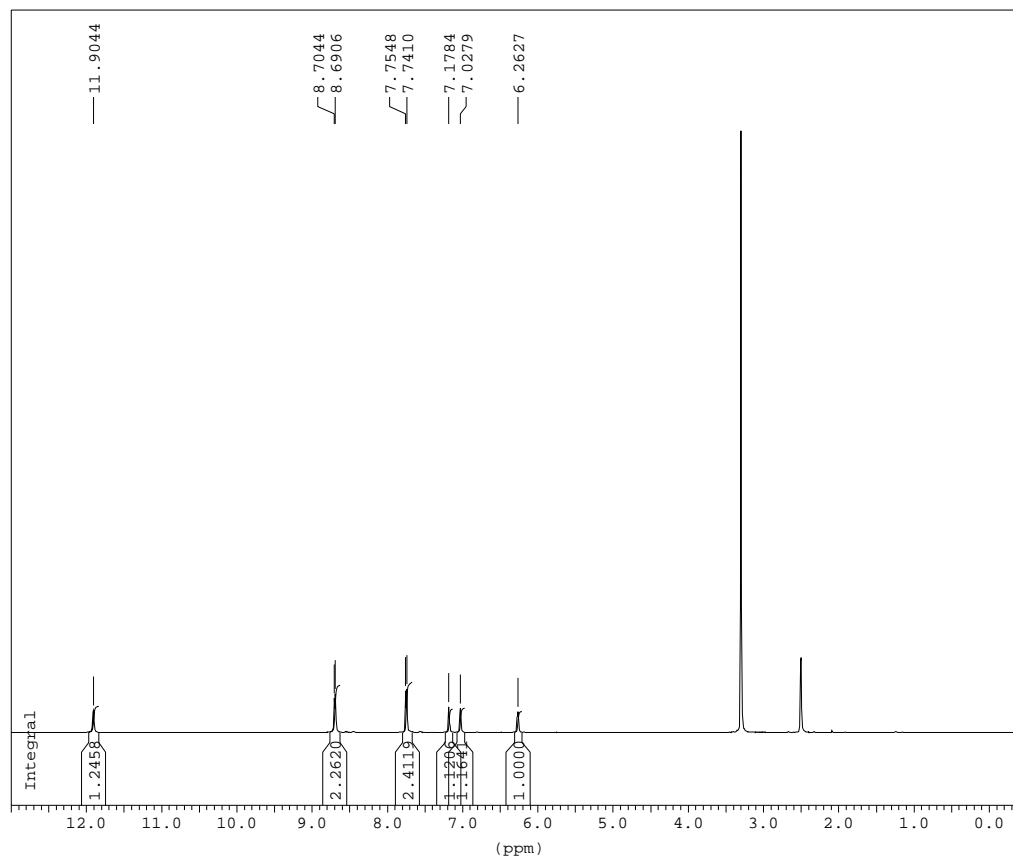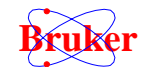

\*\*\* Current Data Parameters \*\*\*

NAME : apl305iel  
EXPNO : 8  
PROCNO : 1  
NUC1 : 1H  
SF : 400.1300833 MHz

Figure 45 <sup>1</sup>H NMR spectra of compound 3.

# <sup>13</sup>C NMR

tetrakis(p-(1H-pyrrole)pyridine)platinum(II) tetrafluoroborate 3.

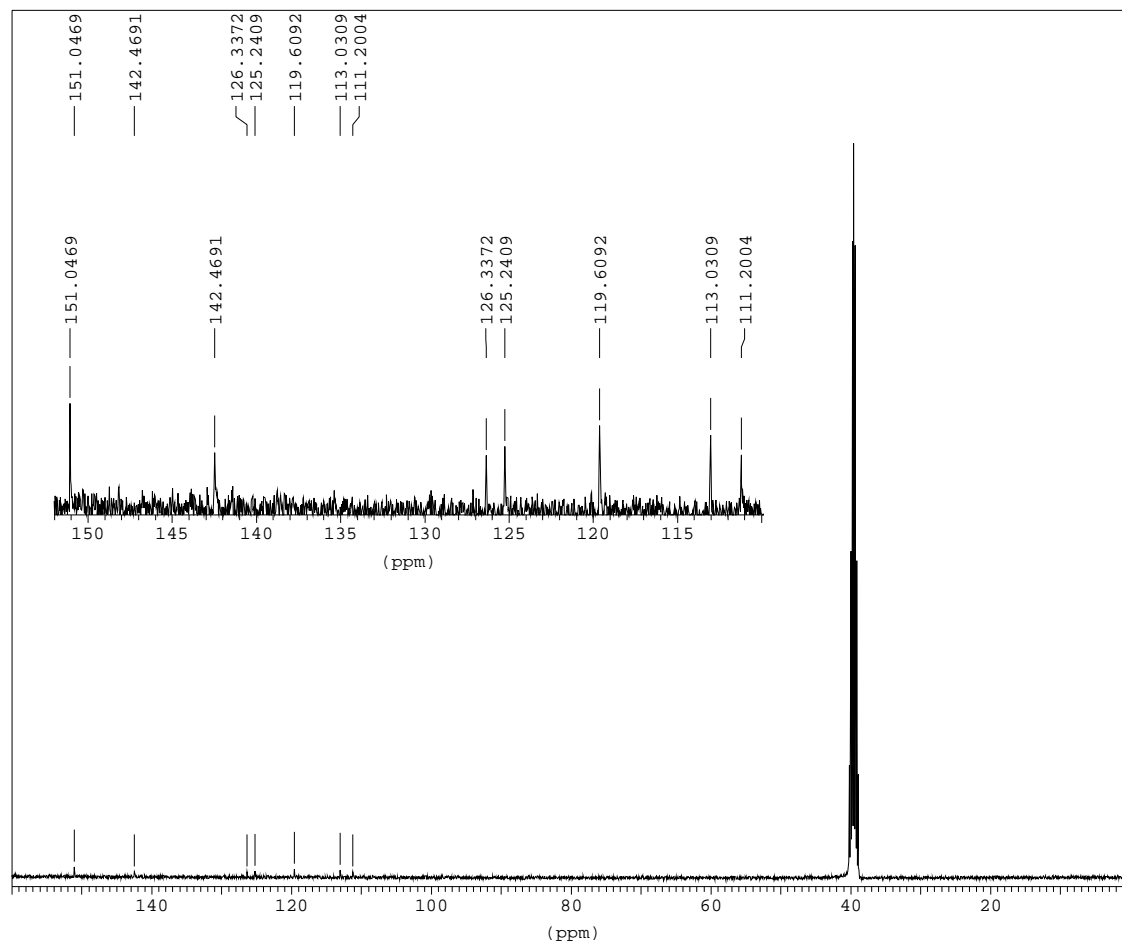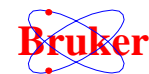

\*\*\* Current Data Parameters \*\*\*

NAME : apl305ie1  
EXPNO : 9  
PROCNO : 1  
NUC1 : 13C  
SF : 400.1316005 MHz

Figure 46 <sup>13</sup>C NMR spectra of compound 3.

# HR Mass spectrum

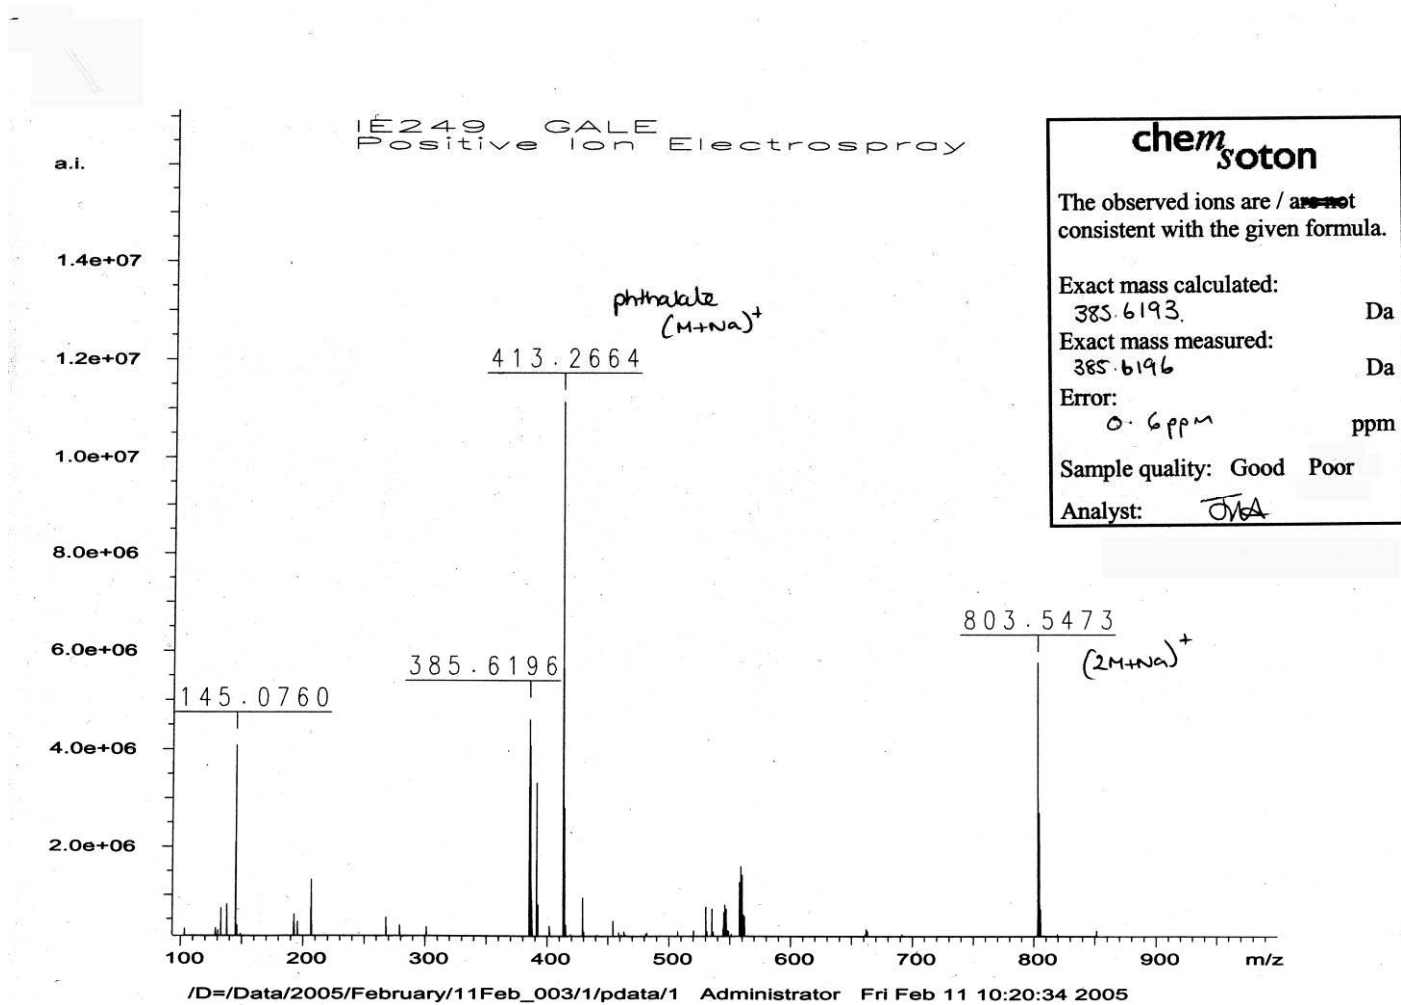

Figure 47 HRES<sup>+</sup> of compound 3.
